# Supplementary material for: A Southeast Asian origin for present-day non-African human Y chromosomes
Source: PubMed Central journal article supplement (PMC7864842; doi:10.1007/s00439-020-02204-9), 2020-07-14

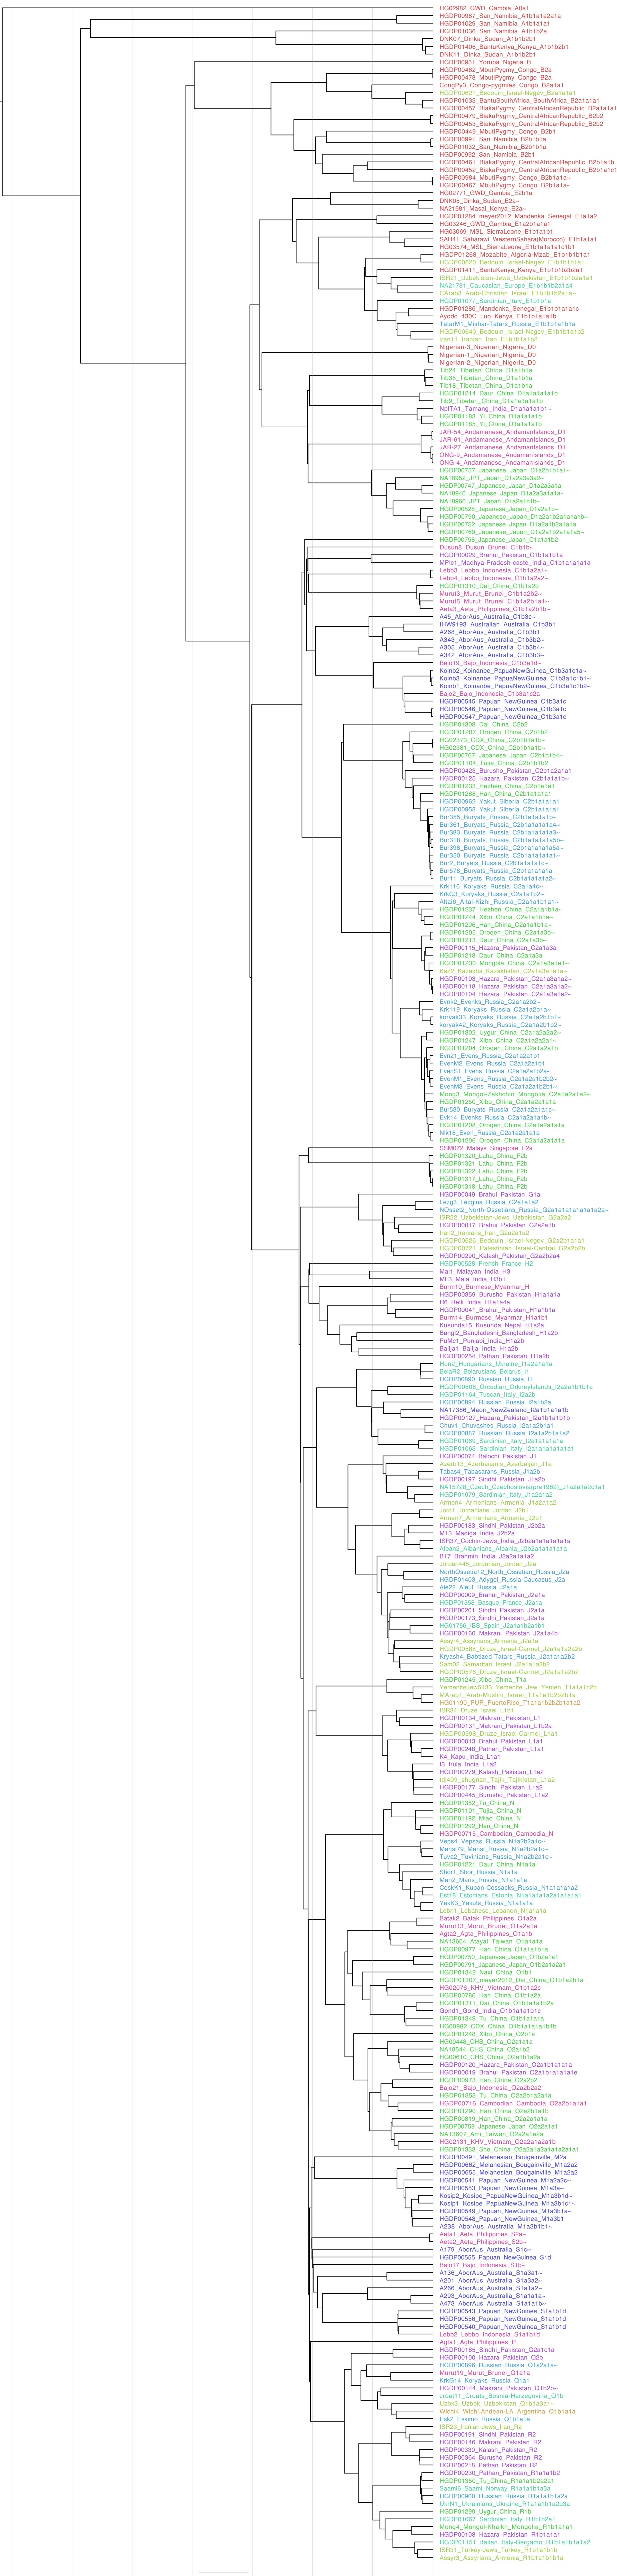

Supplement: 439_2020_2204_MOESM4_ESM.pdf [file 439_2020_2204_MOESM4_ESM.pdf]
