# Supplementary material for: A Southeast Asian origin for present-day non-African human Y chromosomes
Source: Hum Genet. 2020 Jul 14;140(2):299–307. doi: 10.1007/s00439-020-02204-9 (PMC7864842; doi:10.1007/s00439-020-02204-9)
Supplement: Supplementary file 2 — Supplementary material 2 (XLSX 141 kb) [file 439_2020_2204_MOESM2_ESM.xlsx]

## Sheet: Suppl1
Supplementary table 1. Ancient male samples living more than 30,000 years ago used in this study
Sample ID	Skeletal code	Average of 95.4% date range in calBP (defined as 1950 CE)	Location	Country	Lat	Long	Sex	mtDNA	chrY	Publication
Ust_Ishim	UstIshim	45020	Ust'-Ishim, Siberia	Russia	57.7	71.1	M	R*	K(xLT)	Fu et al 2014
Oase1	Oase1	39610	Oase Cave	Romania	45.12	21.9	M	N	N1c1a	Fu et al 2015
GoyetQ116-1	GoyetQ116-1	34795	Goyet	Belgium	50.26	4.28	M	M	C1a2	Fu et al 2016
Paglicci133	Paglicci133	32895	Paglicci	Italy	41.65	15.61	M	U8c	C	Fu et al 2016
Cioclovina1	Cioclovina1	32435	Cioclovina	Romania	45.35	23.84	M	U	..	Fu et al 2016
Kostenki12	Kostenki12	32415	Kostenki	Russia	51.23	39.3	M	U2	C	Fu et al 2016
I1577	KremsWA3	30950	Krems-Wachtberg	Austria	48.41	15.59	M	U5	I	Fu et al 2016
Vestonice13	Vestonice13	30870	Dolni Vestonice	Czech Republic	48.53	16.39	M	U8c	C	Fu et al 2016
Vestonice15	Vestonice15	30870	Dolni Vestonice	Czech Republic	48.53	16.39	M	U5	..	Fu et al 2016
Vestonice14	Vestonice14	30870	Dolni Vestonice	Czech Republic	48.53	16.39	M	U	..	Fu et al 2016
Pavlov1	Pavlov1	30260	Dolni Vestonice	Czech Republic	48.53	16.39	M	U5	I	Fu et al 2016
Vestonice16	Vestonice16	30010	Dolni Vestonice	Czech Republic	48.53	16.39	M	U5	C1a2	Fu et al 2016
Vestonice43	Vestonice43	30010	Dolni Vestonice	Czech Republic	48.53	16.39	M	U	FT	Fu et al 2016
Kostenki14	Kostenki14	37470	Kostenki	Russia	51.23	39.3	M	..	C1b	Seguin-Orlando et al 2014
Sunghir2	Sunghir2	34234	Sunghir	Russia	56.1761	40.5025	M	U2	C1a2	Sikora et al 2017
Sunghir3	Sunghir3	34093	Sunghir	Russia	56.1761	40.5025	M	U2	C1a2	Sikora et al 2017
Sunghir4	Sunghir4	33992	Sunghir	Russia	56.1761	40.5025	M	U2	C1a2	Sikora et al 2017
Sunghir1	Sunghir1	32823	Sunghir	Russia	56.1761	40.5025	M	U8c	C1a2	Sikora et al 2017
Tianyuan	Tianyuan	39475	Tianyuan	China	39.39	115.52	M	..	K2b	Yang et al 2017
Yana1	Yana1	31321-32047a	Yana RHS, Siberia	Russia	70.72	135.42	M	U2'3'4'7'8'9	P1	Sikora et al 2019
Yana2	Yana2	31321-32047a	Yana RHS, Siberia	Russia	52.9	103.5	M	U2'3'4'7'8'9	P1	Sikora et al 2019
a - 95.4% probability (2 sigma)

## Sheet: Suppl2
Supplementary Table 2. Sample information for 1208 individuals
vcf_ID	Sample_ID	Geographic origin	Population	Country of origin	hg_ISOGG_v03.10.19	terminal marker	Used in BEAST analysis (n=332)	Dataset	Comments
EGAN00001072787	A179	Oceania	AborAus	Australia	S1c~	Z41927	y	Bergstrom et al. 2016
EGAN00001072788	A45	Oceania	AborAus	Australia	C1b3c~	Z40424	y	Bergstrom et al. 2016
EGAN00001072789	A201	Oceania	AborAus	Australia	S1a3a2~	Z41922	y	Bergstrom et al. 2016
EGAN00001088616	A342	Oceania	AborAus	Australia	C1b3b3~	Z40254	y	Bergstrom et al. 2016
EGAN00001089015	A238	Oceania	AborAus	Australia	M1a3b1b1~	Z42323	y	Bergstrom et al. 2016
EGAN00001089016	A266	Oceania	AborAus	Australia	S1a1a2~	Z42470	y	Bergstrom et al. 2016
EGAN00001089017	A305	Oceania	AborAus	Australia	C1b3b4~	Z40415	y	Bergstrom et al. 2016
EGAN00001192719	A268	Oceania	AborAus	Australia	C1b3b1	M210	y	Bergstrom et al. 2016
EGAN00001192720	A293	Oceania	AborAus	Australia	S1a1a1a~	Z41754	y	Bergstrom et al. 2016
EGAN00001192721	A343	Oceania	AborAus	Australia	C1b3b2~	Z40249	y	Bergstrom et al. 2016
EGAN00001196788	A136	Oceania	AborAus	Australia	S1a3a1~	Z41916	y	Bergstrom et al. 2016
EGAN00001196789	A440	Oceania	AborAus	Australia	M1a3b1b2~	Z42329		Bergstrom et al. 2016
EGAN00001196790	A473	Oceania	AborAus	Australia	S1a1a1b~	Z41758	y	Bergstrom et al. 2016
ERS1063300	HGDP00129	SouthAsia	Hazara	Pakistan	Q2a1a2	YP745		HGDP (Bergstrom et al. 2020)
ERS1063301	HGDP00122	SouthAsia	Hazara	Pakistan	R1b1a1a1	M478		HGDP (Bergstrom et al. 2020)
ERS1063302	HGDP00628	Cent/WestAsia	Bedouin	Israel-Negev	E1b1b1b2a1a~	M34		HGDP (Bergstrom et al. 2020)
ERS1063305	HGDP00121	SouthAsia	Hazara	Pakistan	R1b1a1a1	M478		HGDP (Bergstrom et al. 2020)
ERS1063413	HGDP00631	Cent/WestAsia	Bedouin	Israel-Negev	J1a2a1a2	P58		HGDP (Bergstrom et al. 2020)
ERS1063416	HGDP00729	Cent/WestAsia	Palestinian	Israel-Central	E1b1b1a1b2a4c1~	L674		HGDP (Bergstrom et al. 2020)
ERS1063417	HGDP00752	EastAsia	Japanese	Japan	D1a2a1b2a1a1a	FGC6373	y	HGDP (Bergstrom et al. 2020)
ERS1063418	HGDP00753	EastAsia	Japanese	Japan	O2a2b1a2a1a	F46		HGDP (Bergstrom et al. 2020)
ERS1063420	HGDP01258	Africa	Mozabite	Algeria-Mzab	E1b1b1b1a1	M183		HGDP (Bergstrom et al. 2020)
ERS1063421	HGDP01262	Africa	Mozabite	Algeria-Mzab	E1b1b1b1a1	M183		HGDP (Bergstrom et al. 2020)
ERS1063422	HGDP01263	Africa	Mozabite	Algeria-Mzab	E1b1b1b1a1	M183		HGDP (Bergstrom et al. 2020)
ERS1063426	HGDP01301	EastAsia	Uygur	China	R1b1a1b1b	CTS1078		HGDP (Bergstrom et al. 2020)
ERS1063427	HGDP01302	EastAsia	Uygur	China	C2a1a2a2a2~	F6193	y	HGDP (Bergstrom et al. 2020)
ERS474042	HGDP00452	Africa	BiakaPygmy	CentralAfricanRepublic	B2b1a1c1	M211	y	HGDP (Bergstrom et al. 2020)
ERS474043	HGDP00453	Africa	BiakaPygmy	CentralAfricanRepublic	B2b2	P112	y	HGDP (Bergstrom et al. 2020)
ERS474047	HGDP00458	Africa	BiakaPygmy	CentralAfricanRepublic	E1b1a1a1a1c1a1a	P252		HGDP (Bergstrom et al. 2020)
ERS474048	HGDP00459	Africa	BiakaPygmy	CentralAfricanRepublic	E1b1a1a1a1c1a1a3a1a1	M4451		HGDP (Bergstrom et al. 2020)
ERS474049	HGDP00460	Africa	BiakaPygmy	CentralAfricanRepublic	E1b1a1a1a1c1a1a	P252		HGDP (Bergstrom et al. 2020)
ERS474051	HGDP00464	Africa	BiakaPygmy	CentralAfricanRepublic	E1b1a1a1a1c1a1a	P252		HGDP (Bergstrom et al. 2020)
ERS474053	HGDP00466	Africa	BiakaPygmy	CentralAfricanRepublic	E1b1a1a1a1c1a1a	P252		HGDP (Bergstrom et al. 2020)
ERS474054	HGDP00469	Africa	BiakaPygmy	CentralAfricanRepublic	E1b1a1a1a2a1a3b1a	U290		HGDP (Bergstrom et al. 2020)
ERS474055	HGDP00470	Africa	BiakaPygmy	CentralAfricanRepublic	E1b1a1a1a1c1a1a	P252		HGDP (Bergstrom et al. 2020)
ERS474056	HGDP00472	Africa	BiakaPygmy	CentralAfricanRepublic	E1b1a1a1a1c1a1a	P252		HGDP (Bergstrom et al. 2020)
ERS474057	HGDP00473	Africa	BiakaPygmy	CentralAfricanRepublic	E1b1a1a1a2a1	P277		HGDP (Bergstrom et al. 2020)
ERS474058	HGDP00475	Africa	BiakaPygmy	CentralAfricanRepublic	B2b1a1c1	M211		HGDP (Bergstrom et al. 2020)
ERS474059	HGDP00479	Africa	BiakaPygmy	CentralAfricanRepublic	B2b2	P112	y	HGDP (Bergstrom et al. 2020)
ERS474060	HGDP00985	Africa	BiakaPygmy	CentralAfricanRepublic	E1b1a1a1a2a1a3b1a	U290		HGDP (Bergstrom et al. 2020)
ERS474061	HGDP00986	Africa	BiakaPygmy	CentralAfricanRepublic	E1b1a1a1a2a1	M4254		HGDP (Bergstrom et al. 2020)
ERS474062	HGDP01086	Africa	BiakaPygmy	CentralAfricanRepublic	E1b1a1a1a1c1a1a	P252		HGDP (Bergstrom et al. 2020)
ERS474063	HGDP01090	Africa	BiakaPygmy	CentralAfricanRepublic	B2b1a1c1	M211		HGDP (Bergstrom et al. 2020)
ERS474064	HGDP01094	Africa	BiakaPygmy	CentralAfricanRepublic	E1b1a1a1a2a1	M4254		HGDP (Bergstrom et al. 2020)
ERS474066	HGDP00450	Africa	MbutiPygmy	Congo	E1b1a1a1a1c1a1a	P252		HGDP (Bergstrom et al. 2020)
ERS474068	HGDP00462	Africa	MbutiPygmy	Congo	B2a	M150	y	HGDP (Bergstrom et al. 2020)
ERS474069	HGDP00463	Africa	MbutiPygmy	Congo	E2b1a1	M200		HGDP (Bergstrom et al. 2020)
ERS474070	HGDP00467	Africa	MbutiPygmy	Congo	B2b1a1a~	M115	y	HGDP (Bergstrom et al. 2020)
ERS474074	HGDP00478	Africa	MbutiPygmy	Congo	B2a	M150	y	HGDP (Bergstrom et al. 2020)
ERS474076	HGDP00984	Africa	MbutiPygmy	Congo	B2b1a1a~	M115	y	HGDP (Bergstrom et al. 2020)
ERS474077	HGDP01081	Africa	MbutiPygmy	Congo	E1b1a1a1a1c1a1a	P252		HGDP (Bergstrom et al. 2020)
ERS474080	HGDP00992	Africa	San	Namibia	B2b1	M192	y	HGDP (Bergstrom et al. 2020)
ERS474081	HGDP01029	Africa	San	Namibia	A1b1a1a1	P28	y	HGDP (Bergstrom et al. 2020)
ERS474084	HGDP00993	Africa	BantuSouthAfrica	SouthAfrica	E1b1a1a1a2a1	P277		HGDP (Bergstrom et al. 2020)
ERS474085	HGDP00994	Africa	BantuSouthAfrica	Lesotho	E1b1b1b2b1~	P72		HGDP (Bergstrom et al. 2020)
ERS474088	HGDP01031	Africa	BantuSouthAfrica	Angola	E2b1a1~	CTS155		HGDP (Bergstrom et al. 2020)
ERS474089	HGDP01033	Africa	BantuSouthAfrica	SouthAfrica	B2a1a1a1	M109	y	HGDP (Bergstrom et al. 2020)
ERS474092	HGDP01405	Africa	BantuKenya	Kenya	E2a~	M41		HGDP (Bergstrom et al. 2020)
ERS474093	HGDP01406	Africa	BantuKenya	Kenya	A1b1b2b1	M118	y	HGDP (Bergstrom et al. 2020)
ERS474094	HGDP01408	Africa	BantuKenya	Kenya	E1b1a1a1a1c1a1a	P252		HGDP (Bergstrom et al. 2020)
ERS474095	HGDP01411	Africa	BantuKenya	Kenya	E1b1b1b2b2a1	M293	y	HGDP (Bergstrom et al. 2020)
ERS474096	HGDP01412	Africa	BantuKenya	Kenya	E1b1a1a1a1c1a1a	P252		HGDP (Bergstrom et al. 2020)
ERS474098	HGDP01415	Africa	BantuKenya	Kenya	E1b1a1a1a2a1a3b1a2	CTS99		HGDP (Bergstrom et al. 2020)
ERS474099	HGDP01416	Africa	BantuKenya	Kenya	E1b1a1a1a1c1a1a	P252		HGDP (Bergstrom et al. 2020)
ERS474101	HGDP01418	Africa	BantuKenya	Kenya	E1b1a1a1a1c1a1a	P252		HGDP (Bergstrom et al. 2020)
ERS474102	HGDP01419	Africa	BantuKenya	Kenya	E1b1a1a1a2a1a3b1a2	CTS99		HGDP (Bergstrom et al. 2020)
ERS474109	HGDP00929	Africa	Yoruba	Nigeria	E1b1a1a1a1c1a1a3c1b	CTS1313		HGDP (Bergstrom et al. 2020)
ERS474110	HGDP00930	Africa	Yoruba	Nigeria	E1b1a1a1a2a1a3b1a	U290		HGDP (Bergstrom et al. 2020)
ERS474111	HGDP00931	Africa	Yoruba	Nigeria	B	M181	y	HGDP (Bergstrom et al. 2020)
ERS474117	HGDP00937	Africa	Yoruba	Nigeria	E1b1a1a1a2a1a3b1a	U290		HGDP (Bergstrom et al. 2020)
ERS474120	HGDP00940	Africa	Yoruba	Nigeria	E1b1a1a1a1c1a1a	P252		HGDP (Bergstrom et al. 2020)
ERS474121	HGDP00941	Africa	Yoruba	Nigeria	E1b1a1a1a1c1b	M263.2		HGDP (Bergstrom et al. 2020)
ERS474122	HGDP00942	Africa	Yoruba	Nigeria	E1b1a1a1a1c1a1a	P252		HGDP (Bergstrom et al. 2020)
ERS474123	HGDP00943	Africa	Yoruba	Nigeria	E1b1a1a1a1c1a1a	P252		HGDP (Bergstrom et al. 2020)
ERS474124	HGDP00944	Africa	Yoruba	Nigeria	E1b1a1a1a1c1a1a	P252		HGDP (Bergstrom et al. 2020)
ERS474125	HGDP00904	Africa	Mandenka	Senegal	E1b1a1a1a1c2a	Z15978		HGDP (Bergstrom et al. 2020)
ERS474126	HGDP00905	Africa	Mandenka	Senegal	E1b1a1a1a1c2c3a2	Z6017		HGDP (Bergstrom et al. 2020)
ERS474128	HGDP00907	Africa	Mandenka	Senegal	E1b1a1a1a1c	L485		HGDP (Bergstrom et al. 2020)
ERS474129	HGDP00908	Africa	Mandenka	Senegal	E1b1a1a1a1c2c3a2	Z6017		HGDP (Bergstrom et al. 2020)
ERS474132	HGDP00911	Africa	Mandenka	Senegal	E1b1a1a1	M180		HGDP (Bergstrom et al. 2020)
ERS474140	HGDP01200	Africa	Mandenka	Senegal	E1a2a1b1	CTS736		HGDP (Bergstrom et al. 2020)
ERS474142	HGDP01202	Africa	Mandenka	Senegal	E1b1a1a1	M180		HGDP (Bergstrom et al. 2020)
ERS474143	HGDP01283	Africa	Mandenka	Senegal	E1b1a1a1	M180		HGDP (Bergstrom et al. 2020)
ERS474145	HGDP01285	Africa	Mandenka	Senegal	E1b1a1a1a1c2c3a2	Z6017		HGDP (Bergstrom et al. 2020)
ERS474147	HGDP00774	EastAsia	Han	China	O1a1a2	F4084		HGDP (Bergstrom et al. 2020)
ERS474150	HGDP00777	EastAsia	Han	China	Q1a1a	M120		HGDP (Bergstrom et al. 2020)
ERS474152	HGDP00779	EastAsia	Han	China	O2a2b1a1a1	F8		HGDP (Bergstrom et al. 2020)
ERS474153	HGDP00780	EastAsia	Han	China	O1a1a1a	F140		HGDP (Bergstrom et al. 2020)
ERS474155	HGDP00782	EastAsia	Han	China	O1b1a1a1a1a1a1b	Z24088		HGDP (Bergstrom et al. 2020)
ERS474159	HGDP00786	EastAsia	Han	China	O1b1a2a	F993	y	HGDP (Bergstrom et al. 2020)
ERS474164	HGDP00815	EastAsia	Han	China	O2a2b1a1a1a1a1a1	F155		HGDP (Bergstrom et al. 2020)
ERS474167	HGDP00819	EastAsia	Han	China	O2a2a1a1a	M159	y	HGDP (Bergstrom et al. 2020)
ERS474169	HGDP00821	EastAsia	Han	China	O2a2b1a1a1b2	CTS5488		HGDP (Bergstrom et al. 2020)
ERS474170	HGDP00822	EastAsia	Han	China	O2a2b1a1a1b1a1	F317		HGDP (Bergstrom et al. 2020)
ERS474171	HGDP00971	EastAsia	Han	China	O2a1b1a2a1a2	F724		HGDP (Bergstrom et al. 2020)
ERS474173	HGDP00973	EastAsia	Han	China	O2a2b2	AM01749	y	HGDP (Bergstrom et al. 2020)
ERS474177	HGDP00977	EastAsia	Han	China	O1a1a1b1a	M101	y	HGDP (Bergstrom et al. 2020)
ERS474182	HGDP01288	EastAsia	Han	China	C2b1a1a1a1	F3850	y	HGDP (Bergstrom et al. 2020)
ERS474183	HGDP01289	EastAsia	Han	China	O1b1a1a1a1b2a	F4229		HGDP (Bergstrom et al. 2020)
ERS474184	HGDP01290	EastAsia	Han	China	O2a2b1a1b	CTS4960	y	HGDP (Bergstrom et al. 2020)
ERS474186	HGDP01292	EastAsia	Han	China	N	M231	y	HGDP (Bergstrom et al. 2020)
ERS474187	HGDP01293	EastAsia	Han	China	N1a2b2a1c~	L665		HGDP (Bergstrom et al. 2020)
ERS474188	HGDP01294	EastAsia	Han	China	O2a1b1a1a1a1a1a1b1	F793		HGDP (Bergstrom et al. 2020)
ERS474189	HGDP01295	EastAsia	Han	China	N	M231		HGDP (Bergstrom et al. 2020)
ERS474190	HGDP01296	EastAsia	Han	China	C2a1a1b1a~	FGC28884	y	HGDP (Bergstrom et al. 2020)
ERS474194	HGDP01310	EastAsia	Dai	China	C1b1a2b	AM00857	y	HGDP (Bergstrom et al. 2020)
ERS474195	HGDP01311	EastAsia	Dai	China	O1b1a1a1b2a	SK1646	y	HGDP (Bergstrom et al. 2020)
ERS474197	HGDP01313	EastAsia	Dai	China	O1b1a1a1b	M1283		HGDP (Bergstrom et al. 2020)
ERS474201	HGDP01317	EastAsia	Lahu	China	F2b	M427	y	HGDP (Bergstrom et al. 2020)
ERS474202	HGDP01318	EastAsia	Lahu	China	F2b	M427	y	HGDP (Bergstrom et al. 2020)
ERS474203	HGDP01319	EastAsia	Lahu	China	O2a1b1a1a1a1f1a	CTS5409		HGDP (Bergstrom et al. 2020)
ERS474205	HGDP01321	EastAsia	Lahu	China	F2b	M427	y	HGDP (Bergstrom et al. 2020)
ERS474206	HGDP01322	EastAsia	Lahu	China	F2b	M427	y	HGDP (Bergstrom et al. 2020)
ERS474208	HGDP01326	EastAsia	Lahu	China	O2a2b1a2a1a	F46		HGDP (Bergstrom et al. 2020)
ERS474209	HGDP01337	EastAsia	Naxi	China	Q1a1a	M120		HGDP (Bergstrom et al. 2020)
ERS474212	HGDP01340	EastAsia	Naxi	China	Q1a1a	M120		HGDP (Bergstrom et al. 2020)
ERS474213	HGDP01341	EastAsia	Naxi	China	Q1a1a	M120		HGDP (Bergstrom et al. 2020)
ERS474214	HGDP01342	EastAsia	Naxi	China	O1b1	F2320	y	HGDP (Bergstrom et al. 2020)
ERS474218	HGDP01327	EastAsia	She	China	O1a1a1a1a1a1	CTS2498		HGDP (Bergstrom et al. 2020)
ERS474219	HGDP01328	EastAsia	She	China	O2a2b1a2a1a	F46		HGDP (Bergstrom et al. 2020)
ERS474220	HGDP01329	EastAsia	She	China	O2a2a1a2a1a1a2a1a1	N5		HGDP (Bergstrom et al. 2020)
ERS474221	HGDP01330	EastAsia	She	China	O1a1a1a1a1a1	CTS2498		HGDP (Bergstrom et al. 2020)
ERS474222	HGDP01331	EastAsia	She	China	O2a1b1a1a1a1a1a1b1	F793		HGDP (Bergstrom et al. 2020)
ERS474223	HGDP01332	EastAsia	She	China	O2a2a1a2a1a1a2a1a1	N5		HGDP (Bergstrom et al. 2020)
ERS474229	HGDP01180	EastAsia	Yi	China	O1b1a1a1b1b	Z39485		HGDP (Bergstrom et al. 2020)
ERS474230	HGDP01181	EastAsia	Yi	China	O1b1a1a1a1a1a1a2a	Z39410		HGDP (Bergstrom et al. 2020)
ERS474231	HGDP01182	EastAsia	Yi	China	N	M231		HGDP (Bergstrom et al. 2020)
ERS474232	HGDP01183	EastAsia	Yi	China	D1a1a1a1b	Z31628	y	HGDP (Bergstrom et al. 2020)
ERS474233	HGDP01184	EastAsia	Yi	China	O1b1a1a1b1a	B426		HGDP (Bergstrom et al. 2020)
ERS474234	HGDP01185	EastAsia	Yi	China	D1a1a1a1b	Z31628	y	HGDP (Bergstrom et al. 2020)
ERS474235	HGDP01186	EastAsia	Yi	China	O2a2b1a1a1	F8		HGDP (Bergstrom et al. 2020)
ERS474236	HGDP01187	EastAsia	Yi	China	O2a1b1a1a1a1f1a	CTS5409		HGDP (Bergstrom et al. 2020)
ERS474238	HGDP01189	EastAsia	Miao	China	O1b1a1a1a	F1252		HGDP (Bergstrom et al. 2020)
ERS474239	HGDP01190	EastAsia	Miao	China	O1b1a1a1a	F1252		HGDP (Bergstrom et al. 2020)
ERS474241	HGDP01192	EastAsia	Miao	China	N	M231	y	HGDP (Bergstrom et al. 2020)
ERS474242	HGDP01193	EastAsia	Miao	China	O1b1a1a1a1a1a1a2	Z24091		HGDP (Bergstrom et al. 2020)
ERS474243	HGDP01194	EastAsia	Miao	China	O2a2a1a2a1a1a2a1a1	N5		HGDP (Bergstrom et al. 2020)
ERS474244	HGDP01195	EastAsia	Miao	China	O2a2a1a2a1a1a2a1a1	N5		HGDP (Bergstrom et al. 2020)
ERS474249	HGDP01096	EastAsia	Tujia	China	O2a2b1a1a1	F8		HGDP (Bergstrom et al. 2020)
ERS474252	HGDP01099	EastAsia	Tujia	China	O2a1a1a	Page124		HGDP (Bergstrom et al. 2020)
ERS474253	HGDP01100	EastAsia	Tujia	China	O1a1a1b1b1a1	SK1571		HGDP (Bergstrom et al. 2020)
ERS474254	HGDP01101	EastAsia	Tujia	China	N	M231	y	HGDP (Bergstrom et al. 2020)
ERS474255	HGDP01102	EastAsia	Tujia	China	O2a2b2a1b	F4124		HGDP (Bergstrom et al. 2020)
ERS474256	HGDP01103	EastAsia	Tujia	China	O2a2b1a2a1a	F46		HGDP (Bergstrom et al. 2020)
ERS474257	HGDP01104	EastAsia	Tujia	China	C2b1b1b2	F13762	y	HGDP (Bergstrom et al. 2020)
ERS474258	HGDP01347	EastAsia	Tu	China	O2a2b1a2a1a	F46		HGDP (Bergstrom et al. 2020)
ERS474259	HGDP01348	EastAsia	Tu	China	N	M231		HGDP (Bergstrom et al. 2020)
ERS474260	HGDP01349	EastAsia	Tu	China	O1b1a1a1a	F1252	y	HGDP (Bergstrom et al. 2020)
ERS474262	HGDP01351	EastAsia	Tu	China	O2a2b1a2a1a	F46		HGDP (Bergstrom et al. 2020)
ERS474263	HGDP01352	EastAsia	Tu	China	N	M231	y	HGDP (Bergstrom et al. 2020)
ERS474264	HGDP01353	EastAsia	Tu	China	O2a2b1a2a1a	F46	y	HGDP (Bergstrom et al. 2020)
ERS474268	HGDP01243	EastAsia	Xibo	China	J2a1a4b	L25		HGDP (Bergstrom et al. 2020)
ERS474269	HGDP01244	EastAsia	Xibo	China	C2a1a1b1a~	FGC28884	y	HGDP (Bergstrom et al. 2020)
ERS474270	HGDP01245	EastAsia	Xibo	China	T1a	M70	y	HGDP (Bergstrom et al. 2020)
ERS474272	HGDP01247	EastAsia	Xibo	China	C2a1a2a2a1~	Y15844	y	HGDP (Bergstrom et al. 2020)
ERS474273	HGDP01248	EastAsia	Xibo	China	O2b1a	F837	y	HGDP (Bergstrom et al. 2020)
ERS474274	HGDP01249	EastAsia	Xibo	China	N1a1a1a1a	L392		HGDP (Bergstrom et al. 2020)
ERS474277	HGDP01233	EastAsia	Hezhen	China	C2b1a1a1	F3883	y	HGDP (Bergstrom et al. 2020)
ERS474279	HGDP01236	EastAsia	Hezhen	China	O2a2b1a2a1a	F46		HGDP (Bergstrom et al. 2020)
ERS474280	HGDP01237	EastAsia	Hezhen	China	C2a1a1b1a~	FGC28884	y	HGDP (Bergstrom et al. 2020)
ERS474282	HGDP01239	EastAsia	Hezhen	China	O2a1b1a1a1a1b	F38		HGDP (Bergstrom et al. 2020)
ERS474284	HGDP01241	EastAsia	Hezhen	China	O2a2b1a1a1	F8		HGDP (Bergstrom et al. 2020)
ERS474287	HGDP01224	EastAsia	Mongola	China	N1a1a1a1a	L392		HGDP (Bergstrom et al. 2020)
ERS474288	HGDP01225	EastAsia	Mongola	China	O2a2b1a1a1	F8		HGDP (Bergstrom et al. 2020)
ERS474290	HGDP01227	EastAsia	Mongola	China	Q1b1a3	L334		HGDP (Bergstrom et al. 2020)
ERS474292	HGDP01229	EastAsia	Mongola	China	O2a2b1a1a1a1a1b1a	F2137		HGDP (Bergstrom et al. 2020)
ERS474293	HGDP01230	EastAsia	Mongola	China	C2a1a3a1e1~	F12703	y	HGDP (Bergstrom et al. 2020)
ERS474296	HGDP01213	EastAsia	Daur	China	C2a1a3b~	F11301	y	HGDP (Bergstrom et al. 2020)
ERS474297	HGDP01214	EastAsia	Daur	China	D1a1a1a1a1b	Y28095	y	HGDP (Bergstrom et al. 2020)
ERS474299	HGDP01216	EastAsia	Daur	China	O2a2b2a1a	F4110		HGDP (Bergstrom et al. 2020)
ERS474300	HGDP01217	EastAsia	Daur	China	O1b1a1a1a1b2a	F4229		HGDP (Bergstrom et al. 2020)
ERS474301	HGDP01218	EastAsia	Daur	China	C2a1a3a	F4002	y	HGDP (Bergstrom et al. 2020)
ERS474303	HGDP01220	EastAsia	Daur	China	O2a2b1a1a1	F8		HGDP (Bergstrom et al. 2020)
ERS474304	HGDP01221	EastAsia	Daur	China	N1a1a	M178	y	HGDP (Bergstrom et al. 2020)
ERS474307	HGDP01204	EastAsia	Oroqen	China	C2a1a2a1b	Z32872	y	HGDP (Bergstrom et al. 2020)
ERS474308	HGDP01205	EastAsia	Oroqen	China	C2a1a3b~	F11301	y	HGDP (Bergstrom et al. 2020)
ERS474309	HGDP01206	EastAsia	Oroqen	China	C2a1a2a1a1a	B89	y	HGDP (Bergstrom et al. 2020)
ERS474310	HGDP01207	EastAsia	Oroqen	China	C2b1b2	MF2097	y	HGDP (Bergstrom et al. 2020)
ERS474311	HGDP01208	EastAsia	Oroqen	China	C2a1a2a1a1a	B89	y	HGDP (Bergstrom et al. 2020)
ERS474315	HGDP00711	SouthEastAsia	Cambodian	Cambodia	O1b1a1a1b	M1283		HGDP (Bergstrom et al. 2020)
ERS474318	HGDP00714	SouthEastAsia	Cambodian	Cambodia	O1b1a1a1a1a1a1a1a1a	F3053		HGDP (Bergstrom et al. 2020)
ERS474319	HGDP00715	SouthEastAsia	Cambodian	Cambodia	N	M231	y	HGDP (Bergstrom et al. 2020)
ERS474320	HGDP00716	SouthEastAsia	Cambodian	Cambodia	O2a2b1a1a1	F8	y	HGDP (Bergstrom et al. 2020)
ERS474325	HGDP00747	EastAsia	Japanese	Japan	D1a2a3a1a	CTS11048	y	HGDP (Bergstrom et al. 2020)
ERS474326	HGDP00748	EastAsia	Japanese	Japan	O1b2a1a1	CTS713		HGDP (Bergstrom et al. 2020)
ERS474328	HGDP00750	EastAsia	Japanese	Japan	O1b2a1a1	CTS713	y	HGDP (Bergstrom et al. 2020)
ERS474329	HGDP00751	EastAsia	Japanese	Japan	O2a1b1a2a1a1a	F1273		HGDP (Bergstrom et al. 2020)
ERS474333	HGDP00755	EastAsia	Japanese	Japan	O1b2a1a1a	CTS7465		HGDP (Bergstrom et al. 2020)
ERS474335	HGDP00757	EastAsia	Japanese	Japan	D1a2b1b1a1~	Z38288	y	HGDP (Bergstrom et al. 2020)
ERS474336	HGDP00758	EastAsia	Japanese	Japan	C1a1a1b2	Z40544	y	HGDP (Bergstrom et al. 2020)
ERS474337	HGDP00759	EastAsia	Japanese	Japan	O2a2a1a1	CTS201	y	HGDP (Bergstrom et al. 2020)
ERS474340	HGDP00762	EastAsia	Japanese	Japan	O1b2a1a1	CTS713		HGDP (Bergstrom et al. 2020)
ERS474342	HGDP00764	EastAsia	Japanese	Japan	O2a1b1a1a1a	F11		HGDP (Bergstrom et al. 2020)
ERS474344	HGDP00766	EastAsia	Japanese	Japan	O1b2a1a2a1	CTS723		HGDP (Bergstrom et al. 2020)
ERS474345	HGDP00767	EastAsia	Japanese	Japan	C2b1b1b4~	M93	y	HGDP (Bergstrom et al. 2020)
ERS474347	HGDP00769	EastAsia	Japanese	Japan	D1a2a1b2a1a1a5~	FT11140	y	HGDP (Bergstrom et al. 2020)
ERS474351	HGDP00790	EastAsia	Japanese	Japan	D1a2a1b2a1a1a1b~	CTS6611	y	HGDP (Bergstrom et al. 2020)
ERS474352	HGDP00791	EastAsia	Japanese	Japan	O1b2a1a2a1	CTS723	y	HGDP (Bergstrom et al. 2020)
ERS474353	HGDP00828	EastAsia	Japanese	Japan	D1a2a1b~	Z3654	y	HGDP (Bergstrom et al. 2020)
ERS474354	HGDP00945	NorthAsia	Yakut	Siberia	N1a1a1a	L708		HGDP (Bergstrom et al. 2020)
ERS474355	HGDP00946	NorthAsia	Yakut	Siberia	N1a1a1a	L708		HGDP (Bergstrom et al. 2020)
ERS474356	HGDP00947	NorthAsia	Yakut	Siberia	N1a1a1a	L708		HGDP (Bergstrom et al. 2020)
ERS474357	HGDP00948	NorthAsia	Yakut	Siberia	N1a1a1a	L708		HGDP (Bergstrom et al. 2020)
ERS474358	HGDP00949	NorthAsia	Yakut	Siberia	N1a1a1a	L708		HGDP (Bergstrom et al. 2020)
ERS474359	HGDP00950	NorthAsia	Yakut	Siberia	N1a1a1a	L708		HGDP (Bergstrom et al. 2020)
ERS474361	HGDP00952	NorthAsia	Yakut	Siberia	N1a1a1a	L708		HGDP (Bergstrom et al. 2020)
ERS474362	HGDP00953	NorthAsia	Yakut	Siberia	N1a1a1a	L708		HGDP (Bergstrom et al. 2020)
ERS474363	HGDP00954	NorthAsia	Yakut	Siberia	N1a1a1a	L708		HGDP (Bergstrom et al. 2020)
ERS474367	HGDP00958	NorthAsia	Yakut	Siberia	C2b1a1a1a1	F3850	y	HGDP (Bergstrom et al. 2020)
ERS474369	HGDP00960	NorthAsia	Yakut	Siberia	N1a1a1a	L708		HGDP (Bergstrom et al. 2020)
ERS474370	HGDP00961	NorthAsia	Yakut	Siberia	N1a1a1a	L708		HGDP (Bergstrom et al. 2020)
ERS474371	HGDP00962	NorthAsia	Yakut	Siberia	C2b1a1a1a1	F3850	y	HGDP (Bergstrom et al. 2020)
ERS474373	HGDP00964	NorthAsia	Yakut	Siberia	N1a1a1a	L708		HGDP (Bergstrom et al. 2020)
ERS474374	HGDP00965	NorthAsia	Yakut	Siberia	N1a1a1a	L708		HGDP (Bergstrom et al. 2020)
ERS474377	HGDP00968	NorthAsia	Yakut	Siberia	N1a1a1a	L708		HGDP (Bergstrom et al. 2020)
ERS474378	HGDP00969	NorthAsia	Yakut	Siberia	N1a1a1a	L708		HGDP (Bergstrom et al. 2020)
ERS474380	HGDP01298	EastAsia	Uygur	China	L1a2	M357		HGDP (Bergstrom et al. 2020)
ERS474381	HGDP01299	EastAsia	Uygur	China	R1b	L278	y	HGDP (Bergstrom et al. 2020)
ERS474382	HGDP01300	EastAsia	Uygur	China	R1a1a1b2	Z93		HGDP (Bergstrom et al. 2020)
ERS474385	HGDP01303	EastAsia	Uygur	China	O2a2b1a2a1a	F46		HGDP (Bergstrom et al. 2020)
ERS474386	HGDP01304	EastAsia	Uygur	China	J2a2a	L581		HGDP (Bergstrom et al. 2020)
ERS474389	HGDP00099	SouthAsia	Hazara	Pakistan	J2a1a4a	M158.2		HGDP (Bergstrom et al. 2020)
ERS474390	HGDP00100	SouthAsia	Hazara	Pakistan	Q2b	Y1171	y	HGDP (Bergstrom et al. 2020)
ERS474391	HGDP00102	SouthAsia	Hazara	Pakistan	R1b1a1a1	M478		HGDP (Bergstrom et al. 2020)
ERS474392	HGDP00103	SouthAsia	Hazara	Pakistan	C2a1a3a1a2~	SK1076	y	HGDP (Bergstrom et al. 2020)
ERS474393	HGDP00104	SouthAsia	Hazara	Pakistan	C2a1a3a1a2~	SK1076	y	HGDP (Bergstrom et al. 2020)
ERS474394	HGDP00105	SouthAsia	Hazara	Pakistan	R1b1a1a1	M478		HGDP (Bergstrom et al. 2020)
ERS474395	HGDP00106	SouthAsia	Hazara	Pakistan	R1b1a1a1	M478		HGDP (Bergstrom et al. 2020)
ERS474396	HGDP00108	SouthAsia	Hazara	Pakistan	R1b1a1a1	M478	y	HGDP (Bergstrom et al. 2020)
ERS474397	HGDP00109	SouthAsia	Hazara	Pakistan	R1b1a1a1	M478		HGDP (Bergstrom et al. 2020)
ERS474398	HGDP00110	SouthAsia	Hazara	Pakistan	R1b1a1a1	M478		HGDP (Bergstrom et al. 2020)
ERS474400	HGDP00115	SouthAsia	Hazara	Pakistan	C2a1a3a	F4002	y	HGDP (Bergstrom et al. 2020)
ERS474402	HGDP00118	SouthAsia	Hazara	Pakistan	C2a1a3a1a2~	SK1076	y	HGDP (Bergstrom et al. 2020)
ERS474404	HGDP00120	SouthAsia	Hazara	Pakistan	O2a1b1a1a1a	F11	y	HGDP (Bergstrom et al. 2020)
ERS474409	HGDP00127	SouthAsia	Hazara	Pakistan	I2a1b1a1b1b	S18331	y	HGDP (Bergstrom et al. 2020)
ERS474413	HGDP00341	SouthAsia	Burusho	Pakistan	R1a1a1b2	Z93		HGDP (Bergstrom et al. 2020)
ERS474414	HGDP00346	SouthAsia	Burusho	Pakistan	R1a1a1b2	Z93		HGDP (Bergstrom et al. 2020)
ERS474415	HGDP00351	SouthAsia	Burusho	Pakistan	G2b1	M377		HGDP (Bergstrom et al. 2020)
ERS474417	HGDP00359	SouthAsia	Burusho	Pakistan	H1a1a1a	M36	y	HGDP (Bergstrom et al. 2020)
ERS474418	HGDP00364	SouthAsia	Burusho	Pakistan	R2	L266	y	HGDP (Bergstrom et al. 2020)
ERS474420	HGDP00372	SouthAsia	Burusho	Pakistan	R2	L266		HGDP (Bergstrom et al. 2020)
ERS474421	HGDP00376	SouthAsia	Burusho	Pakistan	R2	L266		HGDP (Bergstrom et al. 2020)
ERS474422	HGDP00382	SouthAsia	Burusho	Pakistan	L1a2	M357		HGDP (Bergstrom et al. 2020)
ERS474423	HGDP00388	SouthAsia	Burusho	Pakistan	R2	L266		HGDP (Bergstrom et al. 2020)
ERS474424	HGDP00392	SouthAsia	Burusho	Pakistan	J2b2a	M241		HGDP (Bergstrom et al. 2020)
ERS474425	HGDP00397	SouthAsia	Burusho	Pakistan	R2	L266		HGDP (Bergstrom et al. 2020)
ERS474426	HGDP00402	SouthAsia	Burusho	Pakistan	R2	L266		HGDP (Bergstrom et al. 2020)
ERS474427	HGDP00407	SouthAsia	Burusho	Pakistan	R2	L266		HGDP (Bergstrom et al. 2020)
ERS474428	HGDP00412	SouthAsia	Burusho	Pakistan	O2a2b1a2a1a	F46		HGDP (Bergstrom et al. 2020)
ERS474429	HGDP00417	SouthAsia	Burusho	Pakistan	L1a2	M357		HGDP (Bergstrom et al. 2020)
ERS474430	HGDP00423	SouthAsia	Burusho	Pakistan	C2b1a2a1a1	F3750	y	HGDP (Bergstrom et al. 2020)
ERS474432	HGDP00433	SouthAsia	Burusho	Pakistan	R2	L266		HGDP (Bergstrom et al. 2020)
ERS474433	HGDP00438	SouthAsia	Burusho	Pakistan	H1a1a4b	M2716		HGDP (Bergstrom et al. 2020)
ERS474435	HGDP00445	SouthAsia	Burusho	Pakistan	L1a2	M357	y	HGDP (Bergstrom et al. 2020)
ERS474436	HGDP00213	SouthAsia	Pathan	Pakistan	G2b1	M377		HGDP (Bergstrom et al. 2020)
ERS474437	HGDP00214	SouthAsia	Pathan	Pakistan	R1b1a1b1b3a	CTS1843		HGDP (Bergstrom et al. 2020)
ERS474439	HGDP00218	SouthAsia	Pathan	Pakistan	R2	L266	y	HGDP (Bergstrom et al. 2020)
ERS474440	HGDP00222	SouthAsia	Pathan	Pakistan	G2a2b1a2a1	M3240		HGDP (Bergstrom et al. 2020)
ERS474441	HGDP00224	SouthAsia	Pathan	Pakistan	H1a1a4b	M2716		HGDP (Bergstrom et al. 2020)
ERS474442	HGDP00226	SouthAsia	Pathan	Pakistan	Q1b2b~	L940		HGDP (Bergstrom et al. 2020)
ERS474443	HGDP00228	SouthAsia	Pathan	Pakistan	R1a1a1b2	Z93		HGDP (Bergstrom et al. 2020)
ERS474444	HGDP00230	SouthAsia	Pathan	Pakistan	R1a1a1b2	Z93	y	HGDP (Bergstrom et al. 2020)
ERS474446	HGDP00234	SouthAsia	Pathan	Pakistan	R1b1a1b1b3a1	S17864		HGDP (Bergstrom et al. 2020)
ERS474449	HGDP00241	SouthAsia	Pathan	Pakistan	R1a1a1b2	Z93		HGDP (Bergstrom et al. 2020)
ERS474450	HGDP00243	SouthAsia	Pathan	Pakistan	R1a1a1b2a1a1a	Y6		HGDP (Bergstrom et al. 2020)
ERS474453	HGDP00248	SouthAsia	Pathan	Pakistan	L1a1	M27	y	HGDP (Bergstrom et al. 2020)
ERS474454	HGDP00251	SouthAsia	Pathan	Pakistan	Q1b	M346		HGDP (Bergstrom et al. 2020)
ERS474455	HGDP00254	SouthAsia	Pathan	Pakistan	H1a2b	Z14258	y	HGDP (Bergstrom et al. 2020)
ERS474456	HGDP00258	SouthAsia	Pathan	Pakistan	L1a2	M357		HGDP (Bergstrom et al. 2020)
ERS474457	HGDP00259	SouthAsia	Pathan	Pakistan	R1a1a1b2	Z93		HGDP (Bergstrom et al. 2020)
ERS474458	HGDP00262	SouthAsia	Pathan	Pakistan	R1a1a1b2	Z93		HGDP (Bergstrom et al. 2020)
ERS474459	HGDP00264	SouthAsia	Pathan	Pakistan	R1a1a1b2	Z93		HGDP (Bergstrom et al. 2020)
ERS474460	HGDP00163	SouthAsia	Sindhi	Pakistan	R1a1a1b2a1a2c	Y7		HGDP (Bergstrom et al. 2020)
ERS474461	HGDP00165	SouthAsia	Sindhi	Pakistan	Q2a1c1a	Y2990	y	HGDP (Bergstrom et al. 2020)
ERS474462	HGDP00167	SouthAsia	Sindhi	Pakistan	R1a1a1b2a2a1	Z2123		HGDP (Bergstrom et al. 2020)
ERS474463	HGDP00169	SouthAsia	Sindhi	Pakistan	J2a1a	L26		HGDP (Bergstrom et al. 2020)
ERS474464	HGDP00171	SouthAsia	Sindhi	Pakistan	R1a1a1b2a1a2c	Y7		HGDP (Bergstrom et al. 2020)
ERS474465	HGDP00173	SouthAsia	Sindhi	Pakistan	J2a1a	L26	y	HGDP (Bergstrom et al. 2020)
ERS474466	HGDP00175	SouthAsia	Sindhi	Pakistan	J2b2a	M241		HGDP (Bergstrom et al. 2020)
ERS474467	HGDP00177	SouthAsia	Sindhi	Pakistan	L1a2	M357	y	HGDP (Bergstrom et al. 2020)
ERS474468	HGDP00179	SouthAsia	Sindhi	Pakistan	R1a1a1b2a1a2c	Y7		HGDP (Bergstrom et al. 2020)
ERS474469	HGDP00181	SouthAsia	Sindhi	Pakistan	J2a1a2b2a2a2	M68		HGDP (Bergstrom et al. 2020)
ERS474470	HGDP00183	SouthAsia	Sindhi	Pakistan	J2b2a	M241	y	HGDP (Bergstrom et al. 2020)
ERS474471	HGDP00185	SouthAsia	Sindhi	Pakistan	R1a1a1b2	Z93		HGDP (Bergstrom et al. 2020)
ERS474472	HGDP00187	SouthAsia	Sindhi	Pakistan	R1a1a1b2	Z93		HGDP (Bergstrom et al. 2020)
ERS474473	HGDP00189	SouthAsia	Sindhi	Pakistan	R1a1a1b2a1a2c	Y7		HGDP (Bergstrom et al. 2020)
ERS474474	HGDP00191	SouthAsia	Sindhi	Pakistan	R2	L266	y	HGDP (Bergstrom et al. 2020)
ERS474477	HGDP00197	SouthAsia	Sindhi	Pakistan	J1a2b	CTS15	y	HGDP (Bergstrom et al. 2020)
ERS474478	HGDP00199	SouthAsia	Sindhi	Pakistan	R1a1a1b2a1a1a	Y6		HGDP (Bergstrom et al. 2020)
ERS474479	HGDP00201	SouthAsia	Sindhi	Pakistan	J2a1a	L26	y	HGDP (Bergstrom et al. 2020)
ERS474480	HGDP00205	SouthAsia	Sindhi	Pakistan	R1a1a1b2a1a2c	Y7		HGDP (Bergstrom et al. 2020)
ERS474486	HGDP00277	SouthAsia	Kalash	Pakistan	L1a2	M357		HGDP (Bergstrom et al. 2020)
ERS474487	HGDP00279	SouthAsia	Kalash	Pakistan	L1a2	M357	y	HGDP (Bergstrom et al. 2020)
ERS474488	HGDP00281	SouthAsia	Kalash	Pakistan	L1a2	M357		HGDP (Bergstrom et al. 2020)
ERS474489	HGDP00285	SouthAsia	Kalash	Pakistan	G2a2b2a4	Z30504		HGDP (Bergstrom et al. 2020)
ERS474491	HGDP00288	SouthAsia	Kalash	Pakistan	G2a2b2a4	Z30504		HGDP (Bergstrom et al. 2020)
ERS474492	HGDP00290	SouthAsia	Kalash	Pakistan	G2a2b2a4	Z30504	y	HGDP (Bergstrom et al. 2020)
ERS474494	HGDP00302	SouthAsia	Kalash	Pakistan	R1a1a1b2a2a1	Z2123		HGDP (Bergstrom et al. 2020)
ERS474496	HGDP00307	SouthAsia	Kalash	Pakistan	R1a1a1b2a2a1	Z2123		HGDP (Bergstrom et al. 2020)
ERS474497	HGDP00309	SouthAsia	Kalash	Pakistan	J2a1a	L26		HGDP (Bergstrom et al. 2020)
ERS474498	HGDP00311	SouthAsia	Kalash	Pakistan	L1a2	M357		HGDP (Bergstrom et al. 2020)
ERS474499	HGDP00313	SouthAsia	Kalash	Pakistan	R1a1a1b2a2a1	Z2123		HGDP (Bergstrom et al. 2020)
ERS474500	HGDP00315	SouthAsia	Kalash	Pakistan	R1a1a1b2a2a1	Z2123		HGDP (Bergstrom et al. 2020)
ERS474501	HGDP00319	SouthAsia	Kalash	Pakistan	H1a1a4b1	Z5873		HGDP (Bergstrom et al. 2020)
ERS474503	HGDP00326	SouthAsia	Kalash	Pakistan	H1a1a4b1	Z5873		HGDP (Bergstrom et al. 2020)
ERS474505	HGDP00330	SouthAsia	Kalash	Pakistan	R2	L266	y	HGDP (Bergstrom et al. 2020)
ERS474506	HGDP00333	SouthAsia	Kalash	Pakistan	J2b2a	M241		HGDP (Bergstrom et al. 2020)
ERS474507	HGDP00001	SouthAsia	Brahui	Pakistan	R1a1a1b2a1a1a	Y6		HGDP (Bergstrom et al. 2020)
ERS474508	HGDP00003	SouthAsia	Brahui	Pakistan	L1a2	M357		HGDP (Bergstrom et al. 2020)
ERS474509	HGDP00005	SouthAsia	Brahui	Pakistan	R2	L266		HGDP (Bergstrom et al. 2020)
ERS474510	HGDP00007	SouthAsia	Brahui	Pakistan	J2a1a1a2b2a1a	M92		HGDP (Bergstrom et al. 2020)
ERS474511	HGDP00009	SouthAsia	Brahui	Pakistan	J2a1a	L26	y	HGDP (Bergstrom et al. 2020)
ERS474512	HGDP00011	SouthAsia	Brahui	Pakistan	R1a1a1b2a1a1a	Y6		HGDP (Bergstrom et al. 2020)
ERS474513	HGDP00013	SouthAsia	Brahui	Pakistan	L1a1	M27	y	HGDP (Bergstrom et al. 2020)
ERS474514	HGDP00015	SouthAsia	Brahui	Pakistan	J1a2a1a2	P58		HGDP (Bergstrom et al. 2020)
ERS474515	HGDP00017	SouthAsia	Brahui	Pakistan	G2a2a1b	FGC34451	y	HGDP (Bergstrom et al. 2020)
ERS474517	HGDP00021	SouthAsia	Brahui	Pakistan	J2a1a4b	L25		HGDP (Bergstrom et al. 2020)
ERS474518	HGDP00023	SouthAsia	Brahui	Pakistan	R2	L266		HGDP (Bergstrom et al. 2020)
ERS474519	HGDP00025	SouthAsia	Brahui	Pakistan	J2a1a1a2b2a1a	M92		HGDP (Bergstrom et al. 2020)
ERS474521	HGDP00029	SouthAsia	Brahui	Pakistan	C1b1a1b1a	Z12390	y	HGDP (Bergstrom et al. 2020)
ERS474522	HGDP00031	SouthAsia	Brahui	Pakistan	R1a1a1b2a1a1a	Y6		HGDP (Bergstrom et al. 2020)
ERS474523	HGDP00033	SouthAsia	Brahui	Pakistan	R1a1a1b2a1a1a	Y6		HGDP (Bergstrom et al. 2020)
ERS474524	HGDP00035	SouthAsia	Brahui	Pakistan	R1a1a1b2a1a1a	Y6		HGDP (Bergstrom et al. 2020)
ERS474525	HGDP00037	SouthAsia	Brahui	Pakistan	G2a2a1b	FGC34451		HGDP (Bergstrom et al. 2020)
ERS474526	HGDP00039	SouthAsia	Brahui	Pakistan	G2a2b2a1a1c3	PF4202		HGDP (Bergstrom et al. 2020)
ERS474527	HGDP00041	SouthAsia	Brahui	Pakistan	H1a1b1a	Z4417	y	HGDP (Bergstrom et al. 2020)
ERS474528	HGDP00043	SouthAsia	Brahui	Pakistan	J1a2a1a2	P58		HGDP (Bergstrom et al. 2020)
ERS474529	HGDP00045	SouthAsia	Brahui	Pakistan	J1a2a1a2	P58		HGDP (Bergstrom et al. 2020)
ERS474530	HGDP00047	SouthAsia	Brahui	Pakistan	R2	L266		HGDP (Bergstrom et al. 2020)
ERS474531	HGDP00049	SouthAsia	Brahui	Pakistan	G1a	F1761	y	HGDP (Bergstrom et al. 2020)
ERS474532	HGDP00052	SouthAsia	Balochi	Pakistan	R1b1a1b1b	CTS1078		HGDP (Bergstrom et al. 2020)
ERS474533	HGDP00054	SouthAsia	Balochi	Pakistan	L1a1	M27		HGDP (Bergstrom et al. 2020)
ERS474534	HGDP00056	SouthAsia	Balochi	Pakistan	J2a1a	L26		HGDP (Bergstrom et al. 2020)
ERS474535	HGDP00057	SouthAsia	Balochi	Pakistan	J1a2a1a2	P58		HGDP (Bergstrom et al. 2020)
ERS474537	HGDP00060	SouthAsia	Balochi	Pakistan	R1b1a1b1b	CTS1078		HGDP (Bergstrom et al. 2020)
ERS474538	HGDP00062	SouthAsia	Balochi	Pakistan	H1a1a4b2	M2853		HGDP (Bergstrom et al. 2020)
ERS474539	HGDP00064	SouthAsia	Balochi	Pakistan	R1a1a1b2	Z93		HGDP (Bergstrom et al. 2020)
ERS474540	HGDP00066	SouthAsia	Balochi	Pakistan	R1a1a1b2	Z93		HGDP (Bergstrom et al. 2020)
ERS474541	HGDP00068	SouthAsia	Balochi	Pakistan	L1a1	M27		HGDP (Bergstrom et al. 2020)
ERS474542	HGDP00070	SouthAsia	Balochi	Pakistan	R2	L266		HGDP (Bergstrom et al. 2020)
ERS474543	HGDP00072	SouthAsia	Balochi	Pakistan	R2	L266		HGDP (Bergstrom et al. 2020)
ERS474544	HGDP00074	SouthAsia	Balochi	Pakistan	J1	M267	y	HGDP (Bergstrom et al. 2020)
ERS474545	HGDP00076	SouthAsia	Balochi	Pakistan	R1a1a1b2a1a1a	Y6		HGDP (Bergstrom et al. 2020)
ERS474546	HGDP00078	SouthAsia	Balochi	Pakistan	L1a1	M27		HGDP (Bergstrom et al. 2020)
ERS474547	HGDP00080	SouthAsia	Balochi	Pakistan	R1a1a1b2	Z93		HGDP (Bergstrom et al. 2020)
ERS474548	HGDP00082	SouthAsia	Balochi	Pakistan	L1a1	M27		HGDP (Bergstrom et al. 2020)
ERS474549	HGDP00086	SouthAsia	Balochi	Pakistan	R2	L266		HGDP (Bergstrom et al. 2020)
ERS474550	HGDP00088	SouthAsia	Balochi	Pakistan	R1a1a1b2	Z93		HGDP (Bergstrom et al. 2020)
ERS474552	HGDP00092	SouthAsia	Balochi	Pakistan	R1a1a1b2a1a1a	Y6		HGDP (Bergstrom et al. 2020)
ERS474553	HGDP00094	SouthAsia	Balochi	Pakistan	J2a1a	L26		HGDP (Bergstrom et al. 2020)
ERS474554	HGDP00096	SouthAsia	Balochi	Pakistan	R1a1a1b2a1a1a	Y6		HGDP (Bergstrom et al. 2020)
ERS474555	HGDP00098	SouthAsia	Balochi	Pakistan	E1b1b1a1b2	L677		HGDP (Bergstrom et al. 2020)
ERS474556	HGDP00130	SouthAsia	Makrani	Pakistan	R1a1a1b2	Z93		HGDP (Bergstrom et al. 2020)
ERS474557	HGDP00131	SouthAsia	Makrani	Pakistan	L1b2a	M274	y	HGDP (Bergstrom et al. 2020)
ERS474558	HGDP00133	SouthAsia	Makrani	Pakistan	J2a1a	L26		HGDP (Bergstrom et al. 2020)
ERS474559	HGDP00134	SouthAsia	Makrani	Pakistan	L1	M22	y	HGDP (Bergstrom et al. 2020)
ERS474560	HGDP00135	SouthAsia	Makrani	Pakistan	R1a1a1b2a1a1a	Y6		HGDP (Bergstrom et al. 2020)
ERS474561	HGDP00136	SouthAsia	Makrani	Pakistan	R1a1a1b2	Z93		HGDP (Bergstrom et al. 2020)
ERS474562	HGDP00137	SouthAsia	Makrani	Pakistan	J2a1a2b2a2a2	M68		HGDP (Bergstrom et al. 2020)
ERS474563	HGDP00139	SouthAsia	Makrani	Pakistan	L1a1	M27		HGDP (Bergstrom et al. 2020)
ERS474564	HGDP00140	SouthAsia	Makrani	Pakistan	J2a1a	L26		HGDP (Bergstrom et al. 2020)
ERS474565	HGDP00141	SouthAsia	Makrani	Pakistan	R2	L266		HGDP (Bergstrom et al. 2020)
ERS474566	HGDP00143	SouthAsia	Makrani	Pakistan	R1b1a1b1b	CTS1078		HGDP (Bergstrom et al. 2020)
ERS474567	HGDP00144	SouthAsia	Makrani	Pakistan	Q1b2b~	L940	y	HGDP (Bergstrom et al. 2020)
ERS474568	HGDP00145	SouthAsia	Makrani	Pakistan	E1b1a1a1a2a1	M4254		HGDP (Bergstrom et al. 2020)
ERS474569	HGDP00146	SouthAsia	Makrani	Pakistan	R2	L266	y	HGDP (Bergstrom et al. 2020)
ERS474570	HGDP00148	SouthAsia	Makrani	Pakistan	R1a1a1b2	Z93		HGDP (Bergstrom et al. 2020)
ERS474571	HGDP00149	SouthAsia	Makrani	Pakistan	L1a1	M27		HGDP (Bergstrom et al. 2020)
ERS474572	HGDP00150	SouthAsia	Makrani	Pakistan	R1a1a1b2a1a1a	Y6		HGDP (Bergstrom et al. 2020)
ERS474578	HGDP00158	SouthAsia	Makrani	Pakistan	R1a1a1b2	Z93		HGDP (Bergstrom et al. 2020)
ERS474580	HGDP00161	SouthAsia	Makrani	Pakistan	J2a1a4b	L25		HGDP (Bergstrom et al. 2020)
ERS474583	HGDP01383	NorthAsia	Adygei	Russia-Caucasus	G2a2b2a1a1a2a1a	L654.2		HGDP (Bergstrom et al. 2020)
ERS474585	HGDP01385	NorthAsia	Adygei	Russia-Caucasus	G2a2b2a1a1a2a2a	S9409		HGDP (Bergstrom et al. 2020)
ERS474589	HGDP01396	NorthAsia	Adygei	Russia-Caucasus	R1a1a1b2a2a1	Z2123		HGDP (Bergstrom et al. 2020)
ERS474590	HGDP01397	NorthAsia	Adygei	Russia-Caucasus	J2a1a1a2b2	M67		HGDP (Bergstrom et al. 2020)
ERS474596	HGDP01403	NorthAsia	Adygei	Russia-Caucasus	J2a	M410	y	HGDP (Bergstrom et al. 2020)
ERS474597	HGDP01404	NorthAsia	Adygei	Russia-Caucasus	G2a1a1a1a1a1a1	Z7940		HGDP (Bergstrom et al. 2020)
ERS474598	HGDP00879	NorthAsia	Russian	Russia	N1a1a1a1a2	Z1936		HGDP (Bergstrom et al. 2020)
ERS474599	HGDP00880	NorthAsia	Russian	Russia	R1a1a1b1a1a1a	L260		HGDP (Bergstrom et al. 2020)
ERS474601	HGDP00882	NorthAsia	Russian	Russia	R1a1a1b1a1a1a	L260		HGDP (Bergstrom et al. 2020)
ERS474602	HGDP00883	NorthAsia	Russian	Russia	N1a1a1a	L708		HGDP (Bergstrom et al. 2020)
ERS474605	HGDP00886	NorthAsia	Russian	Russia	R1b1a1b1a1a2c1a4b2c1a1b1b1	FGC32679.2		HGDP (Bergstrom et al. 2020)
ERS474607	HGDP00888	NorthAsia	Russian	Russia	R1a1a1b1a1a1a1a1	Y2905		HGDP (Bergstrom et al. 2020)
ERS474609	HGDP00890	NorthAsia	Russian	Russia	I1	M253	y	HGDP (Bergstrom et al. 2020)
ERS474610	HGDP00891	NorthAsia	Russian	Russia	N1a1a1a1a1a	CTS2929		HGDP (Bergstrom et al. 2020)
ERS474611	HGDP00892	NorthAsia	Russian	Russia	R1a1a1b1a1a1c1b	YP416		HGDP (Bergstrom et al. 2020)
ERS474612	HGDP00893	NorthAsia	Russian	Russia	G2a1a1a1a1a	Z8014		HGDP (Bergstrom et al. 2020)
ERS474613	HGDP00894	NorthAsia	Russian	Russia	I2a1b2a	L39	y	HGDP (Bergstrom et al. 2020)
ERS474614	HGDP00895	NorthAsia	Russian	Russia	I1	M253		HGDP (Bergstrom et al. 2020)
ERS474615	HGDP00896	NorthAsia	Russian	Russia	Q1a2a1a~	L713	y	HGDP (Bergstrom et al. 2020)
ERS474616	HGDP00897	NorthAsia	Russian	Russia	R1a1a1b1a2a2	YP270		HGDP (Bergstrom et al. 2020)
ERS474619	HGDP00900	NorthAsia	Russian	Russia	R1a1a1b1a2a	Z92	y	HGDP (Bergstrom et al. 2020)
ERS474623	HGDP00511	Europe	French	France	R1b1a1b1b3a1	S17864		HGDP (Bergstrom et al. 2020)
ERS474624	HGDP00512	Europe	French	France	R1b1a1b1a1a2a1a2	DF17		HGDP (Bergstrom et al. 2020)
ERS474627	HGDP00515	Europe	French	France	R1b1a1b1b3a1a1	CTS9219		HGDP (Bergstrom et al. 2020)
ERS474630	HGDP00518	Europe	French	France	I1a2b1	Z2541		HGDP (Bergstrom et al. 2020)
ERS474631	HGDP00519	Europe	French	France	R1b1a1b1a1a2b1a1	L20		HGDP (Bergstrom et al. 2020)
ERS474634	HGDP00522	Europe	French	France	R1b1a1b1a1a1c2a1	M467		HGDP (Bergstrom et al. 2020)
ERS474637	HGDP00525	Europe	French	France	J2a1a1a2b2a1a	M92		HGDP (Bergstrom et al. 2020)
ERS474640	HGDP00528	Europe	French	France	H2	P96	y	HGDP (Bergstrom et al. 2020)
ERS474649	HGDP00538	Europe	French	France	E1b1b1a1b1a	V13		HGDP (Bergstrom et al. 2020)
ERS474651	HGDP01357	Europe	Basque	France	R1b1a1b1a1a2c1a4b2d2	BY279		HGDP (Bergstrom et al. 2020)
ERS474652	HGDP01358	Europe	Basque	France	J2a1a	L26	y	HGDP (Bergstrom et al. 2020)
ERS474653	HGDP01359	Europe	Basque	France	R1b1a1b1a1a2a1b1a1	M167		HGDP (Bergstrom et al. 2020)
ERS474654	HGDP01360	Europe	Basque	France	E1b1b1a1a1c	CTS693		HGDP (Bergstrom et al. 2020)
ERS474655	HGDP01361	Europe	Basque	France	R1b1a1b1a1a2a	DF27		HGDP (Bergstrom et al. 2020)
ERS474656	HGDP01362	Europe	Basque	France	R1b1a1b1a1a2a1a1a1a1	M153		HGDP (Bergstrom et al. 2020)
ERS474664	HGDP01370	Europe	Basque	France	R1b1a1b1a1a2a1a1a1a1	M153		HGDP (Bergstrom et al. 2020)
ERS474666	HGDP01372	Europe	Basque	France	R1b1a1b1a1a2c1a4b2d1	DF73		HGDP (Bergstrom et al. 2020)
ERS474668	HGDP01374	Europe	Basque	France	R1b1a1b1a1a2c1a1a1a	S476		HGDP (Bergstrom et al. 2020)
ERS474669	HGDP01375	Europe	Basque	France	R1b1a1b1a1a2a1a1a1a1	M153		HGDP (Bergstrom et al. 2020)
ERS474670	HGDP01376	Europe	Basque	France	R1b1a1b1a1a2a1a2	DF17		HGDP (Bergstrom et al. 2020)
ERS474671	HGDP01377	Europe	Basque	France	R1b1a1b1a1a2c1a4b2d2	BY279		HGDP (Bergstrom et al. 2020)
ERS474672	HGDP01378	Europe	Basque	France	R1b1a1b1a1a2a1a1a1a	Z214		HGDP (Bergstrom et al. 2020)
ERS474673	HGDP01379	Europe	Basque	France	R1b1a1b1a1a2a	DF27		HGDP (Bergstrom et al. 2020)
ERS474676	HGDP00795	Europe	Orcadian	OrkneyIslands	R1b1a1b1a1a2c1a2a2a1c	Z17817		HGDP (Bergstrom et al. 2020)
ERS474683	HGDP00803	Europe	Orcadian	OrkneyIslands	R1b1a1b1a1a2c1a1f1a2	S691		HGDP (Bergstrom et al. 2020)
ERS474684	HGDP00804	Europe	Orcadian	OrkneyIslands	R1b1a1b1a1a2c1a2a2a1c	Z17817		HGDP (Bergstrom et al. 2020)
ERS474687	HGDP00807	Europe	Orcadian	OrkneyIslands	R1a1a1b1a3a2	Z287		HGDP (Bergstrom et al. 2020)
ERS474688	HGDP00808	Europe	Orcadian	OrkneyIslands	I2a2a1b1b1a	BY23	y	HGDP (Bergstrom et al. 2020)
ERS474689	HGDP00810	Europe	Orcadian	OrkneyIslands	I1a2a1a	Z62		HGDP (Bergstrom et al. 2020)
ERS474691	HGDP01149	Europe	Italian	Italy-Bergamo	R1b1a1b1a1a2a1b1a1	M167		HGDP (Bergstrom et al. 2020)
ERS474692	HGDP01151	Europe	Italian	Italy-Bergamo	R1b1a1b1a1a2	P312	y	HGDP (Bergstrom et al. 2020)
ERS474693	HGDP01152	Europe	Italian	Italy-Bergamo	G2a2b2a1a1b1a1a2a	Z3441		HGDP (Bergstrom et al. 2020)
ERS474695	HGDP01155	Europe	Italian	Italy-Bergamo	R1b1a1b1a1a2	P312		HGDP (Bergstrom et al. 2020)
ERS474700	HGDP01173	Europe	Italian	Italy-Bergamo	R1b1a1b1a1a2	P312		HGDP (Bergstrom et al. 2020)
ERS474701	HGDP01174	Europe	Italian	Italy-Bergamo	R1b1a1b1a1a1c1a1	DF98		HGDP (Bergstrom et al. 2020)
ERS474703	HGDP01161	Europe	Tuscan	Italy	R1b1a1b1a1a2	P312		HGDP (Bergstrom et al. 2020)
ERS474704	HGDP01162	Europe	Tuscan	Italy	G2a2b2a1a1b2a	Z39088		HGDP (Bergstrom et al. 2020)
ERS474706	HGDP01164	Europe	Tuscan	Italy	I2a2b	Z26381	y	HGDP (Bergstrom et al. 2020)
ERS474707	HGDP01166	Europe	Tuscan	Italy	R1b1a1b1a1a2b3c	Z145		HGDP (Bergstrom et al. 2020)
ERS474708	HGDP01167	Europe	Tuscan	Italy	E1b1b1a1b1a	V13		HGDP (Bergstrom et al. 2020)
ERS474712	HGDP00666	Europe	Sardinian	Italy	I2a1a1a1a1a1a1	PF4189		HGDP (Bergstrom et al. 2020)
ERS474714	HGDP00668	Europe	Sardinian	Italy	I2a1a1a1a1a1a1	PF4189		HGDP (Bergstrom et al. 2020)
ERS474716	HGDP00670	Europe	Sardinian	Italy	I2a1a1a1a1a1a1	PF4189		HGDP (Bergstrom et al. 2020)
ERS474717	HGDP00671	Europe	Sardinian	Italy	I2a1a1a1a1a	PF4088		HGDP (Bergstrom et al. 2020)
ERS474720	HGDP00674	Europe	Sardinian	Italy	I2a1a1a1a1a1a1	PF4189		HGDP (Bergstrom et al. 2020)
ERS474722	HGDP01063	Europe	Sardinian	Italy	I2a1a1a1a1a1a1	PF4189	y	HGDP (Bergstrom et al. 2020)
ERS474725	HGDP01066	Europe	Sardinian	Italy	I2a1a1a1a1a1a1	PF4189		HGDP (Bergstrom et al. 2020)
ERS474726	HGDP01067	Europe	Sardinian	Italy	R1b1b2a1	V35	y	HGDP (Bergstrom et al. 2020)
ERS474728	HGDP01069	Europe	Sardinian	Italy	I2a1a1a1a1a	PF4088	y	HGDP (Bergstrom et al. 2020)
ERS474730	HGDP01071	Europe	Sardinian	Italy	I2a1a1a1a1a1a1	PF4189		HGDP (Bergstrom et al. 2020)
ERS474732	HGDP01073	Europe	Sardinian	Italy	G2a2b2a1a1a1a1a1a	Z29424		HGDP (Bergstrom et al. 2020)
ERS474734	HGDP01075	Europe	Sardinian	Italy	R1b1a1b1a1a2	P312		HGDP (Bergstrom et al. 2020)
ERS474736	HGDP01077	Europe	Sardinian	Italy	E1b1b1a	L539	y	HGDP (Bergstrom et al. 2020)
ERS474744	HGDP00562	Cent/WestAsia	Druze	Israel-Carmel	L1a1	M27		HGDP (Bergstrom et al. 2020)
ERS474757	HGDP00576	Cent/WestAsia	Druze	Israel-Carmel	J2a1a1a2b2	M67	y	HGDP (Bergstrom et al. 2020)
ERS474761	HGDP00580	Cent/WestAsia	Druze	Israel-Carmel	L1a1	M27		HGDP (Bergstrom et al. 2020)
ERS474768	HGDP00588	Cent/WestAsia	Druze	Israel-Carmel	J2a1a1a2a2b	M47	y	HGDP (Bergstrom et al. 2020)
ERS474771	HGDP00594	Cent/WestAsia	Druze	Israel-Carmel	J2a1a1a2a2b	M47		HGDP (Bergstrom et al. 2020)
ERS474772	HGDP00595	Cent/WestAsia	Druze	Israel-Carmel	R1b1a1b1a1a2	P312		HGDP (Bergstrom et al. 2020)
ERS474773	HGDP00598	Cent/WestAsia	Druze	Israel-Carmel	L1a1	M27	y	HGDP (Bergstrom et al. 2020)
ERS474774	HGDP00599	Cent/WestAsia	Druze	Israel-Carmel	E1b1b1a1b1a	V13		HGDP (Bergstrom et al. 2020)
ERS474775	HGDP00600	Cent/WestAsia	Druze	Israel-Carmel	J2a1a4b4	L192.2		HGDP (Bergstrom et al. 2020)
ERS474777	HGDP00602	Cent/WestAsia	Druze	Israel-Carmel	L1a1	M27		HGDP (Bergstrom et al. 2020)
ERS474778	HGDP00604	Cent/WestAsia	Druze	Israel-Carmel	L1a1	M27		HGDP (Bergstrom et al. 2020)
ERS474780	HGDP00675	Cent/WestAsia	Palestinian	Israel-Central	G2a2b2a1a1a2	S10678		HGDP (Bergstrom et al. 2020)
ERS474781	HGDP00676	Cent/WestAsia	Palestinian	Israel-Central	G2a2b2a1a1a2	S10678		HGDP (Bergstrom et al. 2020)
ERS474782	HGDP00677	Cent/WestAsia	Palestinian	Israel-Central	G2a2b2a1a1a2	S10678		HGDP (Bergstrom et al. 2020)
ERS474783	HGDP00678	Cent/WestAsia	Palestinian	Israel-Central	J1a2a1a2	P58		HGDP (Bergstrom et al. 2020)
ERS474805	HGDP00723	Cent/WestAsia	Palestinian	Israel-Central	G2a2b2a1a1a2	S10678		HGDP (Bergstrom et al. 2020)
ERS474806	HGDP00724	Cent/WestAsia	Palestinian	Israel-Central	G2a2b2b	F1705	y	HGDP (Bergstrom et al. 2020)
ERS474808	HGDP00726	Cent/WestAsia	Palestinian	Israel-Central	G2a2b2a1a1a2	S10678		HGDP (Bergstrom et al. 2020)
ERS474809	HGDP00727	Cent/WestAsia	Palestinian	Israel-Central	G2a2b2a1a1a2	S10678		HGDP (Bergstrom et al. 2020)
ERS474811	HGDP00730	Cent/WestAsia	Palestinian	Israel-Central	G2a2b2a1a1a2	S10678		HGDP (Bergstrom et al. 2020)
ERS474812	HGDP00731	Cent/WestAsia	Palestinian	Israel-Central	G2a2b2a1a1a2	S10678		HGDP (Bergstrom et al. 2020)
ERS474813	HGDP00732	Cent/WestAsia	Palestinian	Israel-Central	G2a2b2a1a1a2	S10678		HGDP (Bergstrom et al. 2020)
ERS474814	HGDP00733	Cent/WestAsia	Palestinian	Israel-Central	G2a2b2a1a1a2	S10678		HGDP (Bergstrom et al. 2020)
ERS474815	HGDP00734	Cent/WestAsia	Palestinian	Israel-Central	G2a2b2a1a1a2	S10678		HGDP (Bergstrom et al. 2020)
ERS474827	HGDP00608	Cent/WestAsia	Bedouin	Israel-Negev	J1a2a1a2	P58		HGDP (Bergstrom et al. 2020)
ERS474828	HGDP00609	Cent/WestAsia	Bedouin	Israel-Negev	J1a2a1a2	P58		HGDP (Bergstrom et al. 2020)
ERS474829	HGDP00610	Cent/WestAsia	Bedouin	Israel-Negev	J1a2a1a2	P58		HGDP (Bergstrom et al. 2020)
ERS474830	HGDP00611	Cent/WestAsia	Bedouin	Israel-Negev	J1a2a1a2	P58		HGDP (Bergstrom et al. 2020)
ERS474836	HGDP00618	Cent/WestAsia	Bedouin	Israel-Negev	J1a2a1a2	P58		HGDP (Bergstrom et al. 2020)
ERS474837	HGDP00619	Cent/WestAsia	Bedouin	Israel-Negev	J1a2a1a2	P58		HGDP (Bergstrom et al. 2020)
ERS474838	HGDP00620	Cent/WestAsia	Bedouin	Israel-Negev	E1b1b1b1a1	M183	y	HGDP (Bergstrom et al. 2020)
ERS474839	HGDP00621	Cent/WestAsia	Bedouin	Israel-Negev	B2a1a1a1	M109	y	HGDP (Bergstrom et al. 2020)
ERS474840	HGDP00622	Cent/WestAsia	Bedouin	Israel-Negev	R1a1a1b1a	Z282		HGDP (Bergstrom et al. 2020)
ERS474841	HGDP00623	Cent/WestAsia	Bedouin	Israel-Negev	J1a2a1a2	P58		HGDP (Bergstrom et al. 2020)
ERS474842	HGDP00624	Cent/WestAsia	Bedouin	Israel-Negev	J1a2a1a2	P58		HGDP (Bergstrom et al. 2020)
ERS474844	HGDP00626	Cent/WestAsia	Bedouin	Israel-Negev	G2a2b1a1a1	L14	y	HGDP (Bergstrom et al. 2020)
ERS474845	HGDP00627	Cent/WestAsia	Bedouin	Israel-Negev	J1a2a1a2	P58		HGDP (Bergstrom et al. 2020)
ERS474847	HGDP00629	Cent/WestAsia	Bedouin	Israel-Negev	J1a2a1a2	P58		HGDP (Bergstrom et al. 2020)
ERS474848	HGDP00630	Cent/WestAsia	Bedouin	Israel-Negev	J1a2a1a2	P58		HGDP (Bergstrom et al. 2020)
ERS474856	HGDP00639	Cent/WestAsia	Bedouin	Israel-Negev	J1a2a1a2	P58		HGDP (Bergstrom et al. 2020)
ERS474857	HGDP00640	Cent/WestAsia	Bedouin	Israel-Negev	E1b1b1a1b2	L677	y	HGDP (Bergstrom et al. 2020)
ERS474858	HGDP00641	Cent/WestAsia	Bedouin	Israel-Negev	J1a2a1a2	P58		HGDP (Bergstrom et al. 2020)
ERS474859	HGDP00642	Cent/WestAsia	Bedouin	Israel-Negev	E1b1b1b2a1a~	M34		HGDP (Bergstrom et al. 2020)
ERS474862	HGDP00645	Cent/WestAsia	Bedouin	Israel-Negev	J1a2b	CTS15		HGDP (Bergstrom et al. 2020)
ERS474865	HGDP00648	Cent/WestAsia	Bedouin	Israel-Negev	J1a2a1a2	P58		HGDP (Bergstrom et al. 2020)
ERS474870	HGDP00654	Cent/WestAsia	Bedouin	Israel-Negev	J1a2a1a2	P58		HGDP (Bergstrom et al. 2020)
ERS474874	HGDP01255	Africa	Mozabite	Algeria-Mzab	E1b1b1b1a1	M183		HGDP (Bergstrom et al. 2020)
ERS474875	HGDP01256	Africa	Mozabite	Algeria-Mzab	E1b1b1b1a1	M183		HGDP (Bergstrom et al. 2020)
ERS474876	HGDP01257	Africa	Mozabite	Algeria-Mzab	E1b1b1b1a1	M183		HGDP (Bergstrom et al. 2020)
ERS474878	HGDP01259	Africa	Mozabite	Algeria-Mzab	E1b1b1b1a1	M183		HGDP (Bergstrom et al. 2020)
ERS474879	HGDP01260	Africa	Mozabite	Algeria-Mzab	E1b1a1a1a2a1	M4254		HGDP (Bergstrom et al. 2020)
ERS474880	HGDP01261	Africa	Mozabite	Algeria-Mzab	R1b	L278		HGDP (Bergstrom et al. 2020)
ERS474883	HGDP01264	Africa	Mozabite	Algeria-Mzab	E1b1b1b1a1	M183		HGDP (Bergstrom et al. 2020)
ERS474884	HGDP01265	Africa	Mozabite	Algeria-Mzab	E1b1b1b1a1	M183		HGDP (Bergstrom et al. 2020)
ERS474885	HGDP01266	Africa	Mozabite	Algeria-Mzab	E1b1b1b1a1	M183		HGDP (Bergstrom et al. 2020)
ERS474887	HGDP01268	Africa	Mozabite	Algeria-Mzab	E1b1b1b1a1	M183	y	HGDP (Bergstrom et al. 2020)
ERS474888	HGDP01269	Africa	Mozabite	Algeria-Mzab	E1b1a1a1a2a1	M4254		HGDP (Bergstrom et al. 2020)
ERS474890	HGDP01271	Africa	Mozabite	Algeria-Mzab	R1b	L278		HGDP (Bergstrom et al. 2020)
ERS474891	HGDP01272	Africa	Mozabite	Algeria-Mzab	E1b1b1b1a1	M183		HGDP (Bergstrom et al. 2020)
ERS474898	HGDP01279	Africa	Mozabite	Algeria-Mzab	E1b1b1b1a1	M183		HGDP (Bergstrom et al. 2020)
ERS474900	HGDP01282	Africa	Mozabite	Algeria-Mzab	E1b1b1b1a1	M183		HGDP (Bergstrom et al. 2020)
ERS474901	HGDP00491	Oceania	Melanesian	Bougainville	M2a	M177^^	y	HGDP (Bergstrom et al. 2020)
ERS474902	HGDP00655	Oceania	Melanesian	Bougainville	M1a2a2	M104_1^^	y	HGDP (Bergstrom et al. 2020)
ERS474906	HGDP00662	Oceania	Melanesian	Bougainville	M1a2a2	M104_1^^	y	HGDP (Bergstrom et al. 2020)
ERS474910	HGDP00788	Oceania	Melanesian	Bougainville	M1a2a2	M104_1^^		HGDP (Bergstrom et al. 2020)
ERS474913	HGDP00541	Oceania	Papuan	NewGuinea	M1a2a2c~	Z42281	y	HGDP (Bergstrom et al. 2020)
ERS474914	HGDP00542	Oceania	Papuan	NewGuinea	M1a2a2b	M83		HGDP (Bergstrom et al. 2020)
ERS474915	HGDP00543	Oceania	Papuan	NewGuinea	S1a1b1d	Z41502	y	HGDP (Bergstrom et al. 2020)
ERS474917	HGDP00545	Oceania	Papuan	NewGuinea	C1b3a1c	Y25257	y	HGDP (Bergstrom et al. 2020)
ERS474918	HGDP00546	Oceania	Papuan	NewGuinea	C1b3a1c	Y25257	y	HGDP (Bergstrom et al. 2020)
ERS474919	HGDP00547	Oceania	Papuan	NewGuinea	C1b3a1c	Y25257	y	HGDP (Bergstrom et al. 2020)
ERS474921	HGDP00549	Oceania	Papuan	NewGuinea	M1a3b1a~	Z42293	y	HGDP (Bergstrom et al. 2020)
ERS474923	HGDP00551	Oceania	Papuan	NewGuinea	S1d	Z41937		HGDP (Bergstrom et al. 2020)
ERS474925	HGDP00553	Oceania	Papuan	NewGuinea	M1a3a~	P51	y	HGDP (Bergstrom et al. 2020)
ERS474927	HGDP00555	Oceania	Papuan	NewGuinea	S1d	Z41937	y	HGDP (Bergstrom et al. 2020)
ERS474928	HGDP00556	Oceania	Papuan	NewGuinea	S1a1b1d	Z41502	y	HGDP (Bergstrom et al. 2020)
ERS474929	HGDP01037	America	Pima	Mexico	Q1b1a2	M971		HGDP (Bergstrom et al. 2020)
ERS474931	HGDP01043	America	Pima	Mexico	Q1b1a2	M971		HGDP (Bergstrom et al. 2020)
ERS474934	HGDP01050	America	Pima	Mexico	G2a2b2a1a1b1a1b	FGC477		HGDP (Bergstrom et al. 2020)
ERS474937	HGDP01055	America	Pima	Mexico	Q1b1a1a	M3		HGDP (Bergstrom et al. 2020)
ERS474939	HGDP01057	America	Pima	Mexico	Q1b1a2	M971		HGDP (Bergstrom et al. 2020)
ERS474941	HGDP01059	America	Pima	Mexico	Q1b1a2	M971		HGDP (Bergstrom et al. 2020)
ERS474942	HGDP01060	America	Pima	Mexico	Q1b1a2	M971		HGDP (Bergstrom et al. 2020)
ERS474945	HGDP00856	America	Maya	Mexico	Q1b1a1a	M3		HGDP (Bergstrom et al. 2020)
ERS474963	HGDP00877	America	Maya	Mexico	Q1b1a2	M971		HGDP (Bergstrom et al. 2020)
ERS474965	HGDP00703	America	Colombian	Colombia	Q1b1a1a	M3		HGDP (Bergstrom et al. 2020)
ERS474969	HGDP00710	America	Colombian	Colombia	Q1b1a1a	M3		HGDP (Bergstrom et al. 2020)
ERS474972	HGDP00837	America	Surui	Brazil	Q1b1a1a	M3		HGDP (Bergstrom et al. 2020)
ERS474974	HGDP00843	America	Surui	Brazil	Q1b1a1a1c~	P106		HGDP (Bergstrom et al. 2020)
ERS474975	HGDP00845	America	Surui	Brazil	Q1b1a1a	M3		HGDP (Bergstrom et al. 2020)
ERS474977	HGDP00849	America	Surui	Brazil	Q1b1a1a	M3		HGDP (Bergstrom et al. 2020)
ERS474985	HGDP01009	America	Karitiana	Brazil	Q1b1a1a	M3		HGDP (Bergstrom et al. 2020)
ERS474988	HGDP01013	America	Karitiana	Brazil	Q1b1a1a	M3		HGDP (Bergstrom et al. 2020)
ERS474992	HGDP01019	America	Karitiana	Brazil	Q1b1a1a	M3		HGDP (Bergstrom et al. 2020)
ERS700537	Tib9	EastAsia	Tibetan	China	D1a1a1a1a1b	Y28095	y	Haber et al. 2019
ERS700546	Tib18	EastAsia	Tibetan	China	D1a1b1a	M533	y	Haber et al. 2019
ERS700552	Tib24	EastAsia	Tibetan	China	D1a1b1a	M533	y	Haber et al. 2019
ERS700563	Tib35	EastAsia	Tibetan	China	D1a1b1a	M533	y	Haber et al. 2019
ERS813221	HGDP00454	Africa	BiakaPygmy	CentralAfricanRepublic	E1b1a1a1a1c1a1a	P252		HGDP (Bergstrom et al. 2020)
ERS813222	HGDP00455	Africa	BiakaPygmy	CentralAfricanRepublic	E1b1a1a1a2a1a3b1a	U290		HGDP (Bergstrom et al. 2020)
ERS813223	HGDP00625	Cent/WestAsia	Bedouin	Israel-Negev	R1a1a1b1a	Z282		HGDP (Bergstrom et al. 2020)
ERS813224	HGDP00906	Africa	Mandenka	Senegal	E1b1a1a1a1c2c1b	Z16095		HGDP (Bergstrom et al. 2020)
ERS813226	HGDP00912	Africa	Mandenka	Senegal	E1b1a1a1	M180		HGDP (Bergstrom et al. 2020)
ERS813227	HGDP00913	Africa	Mandenka	Senegal	E1b1a1a1a1c	L485		HGDP (Bergstrom et al. 2020)
ERS813229	HGDP01309	EastAsia	Dai	China	O2a1b2	SK1673		HGDP (Bergstrom et al. 2020)
ERS813230	HGDP01339	EastAsia	Naxi	China	N	M231		HGDP (Bergstrom et al. 2020)
GS000013694-ASM	Udmrd2	NorthAsia	Udmurds	Russia	N1a1a1a	L708		Karmin et al. 2015
GS000013698-ASM	Mord3	NorthAsia	Mordvins	Russia	I1a3a1a2a1	Y6228		Karmin et al. 2015
GS000013704-ASM	Tatar3	NorthAsia	Tatars	Russia	R1a1a1b1a1a1c	CTS11962.1		Karmin et al. 2015
GS000013705-ASM	Tatar2	NorthAsia	Tatars	Russia	L1b1	M349		Karmin et al. 2015
GS000013716-ASM	Selkp3	NorthAsia	Selkups	Russia	Q1b1a3	L334		Karmin et al. 2015
GS000013717-ASM	Ket1	NorthAsia	Kets	Russia	Q1b1a3	L334		Karmin et al. 2015
GS000013724-ASM	Lezg2	NorthAsia	Lezgins	Russia	J1a2b	CTS15		Karmin et al. 2015
GS000013739-ASM	NOsset6	NorthAsia	North-Ossetians	Russia	G2a1a1a1a1a1a1a2a~	FGC705		Karmin et al. 2015
GS000013741-ASM	Azerb13	Cent/WestAsia	Azerbaijanis	Azerbaijan	J1a	CTS5368	y	Karmin et al. 2015
GS000013745-ASM	Armen3	Cent/WestAsia	Armenians	Armenia	J1a2a1a2	P58		Karmin et al. 2015
GS000013746-ASM	Armen7	Cent/WestAsia	Armenians	Armenia	J2b1	M205	y	Karmin et al. 2015
GS000013747-ASM	Iran1	Cent/WestAsia	Iranians	Iran	J2a1a4b	L25		Karmin et al. 2015
GS000013749-ASM	Assyr1	Cent/WestAsia	Assyrians	Armenia	R1a1a1b2a2b	Z2122		Karmin et al. 2015
GS000013750-ASM	Assyr3	Cent/WestAsia	Assyrians	Armenia	R1b1a1b1b1a	L943	y	Karmin et al. 2015
GS000013751-ASM	Assyr4	Cent/WestAsia	Assyrians	Armenia	J2a1a	L26	y	Karmin et al. 2015
GS000013752-ASM	Kaz2	Cent/WestAsia	Kazakhs	Kazakhstan	C2a1a3a1a1a~	Y20087	y	Karmin et al. 2015
GS000013754-ASM	croat12	Europe	Croats	Bosnia-Herzegovina	I2a1a2b1a1a1	S17250		Karmin et al. 2015
GS000013755-ASM	UkrN1	Europe	Ukrainians	Ukraine	R1a1a1b1a2b3a	CTS3402	y	Karmin et al. 2015
GS000013756-ASM	RusPi2	NorthAsia	North-Russians	Russia	R1a1a1b1a2a	Z92		Karmin et al. 2015
GS000013757-ASM	Kyrgz4	Cent/WestAsia	Kyrgyz	Kyrgyzstan	R1a1a1b2	Z93		Karmin et al. 2015
GS000013758-ASM	Shugn1	Cent/WestAsia	Shugnan	Tajikistan	R1a1a1b2a2a1	Z2123		Karmin et al. 2015
GS000013761-ASM	Bur11	NorthAsia	Buryats	Russia	C2b1a1a1a1a2~	B103	y	Karmin et al. 2015
GS000013763-ASM	TatarM1	NorthAsia	Mishar-Tatars	Russia	E1b1b1a1b1a	V13	y	Karmin et al. 2015
GS000013764-ASM	Chuv1	NorthAsia	Chuvashes	Russia	I2a1a2b1a1	CTS5966	y	Karmin et al. 2015
GS000013765-ASM	Karel1	NorthAsia	Karelians	Russia	R1a1a1b1a2a	Z92		Karmin et al. 2015
GS000014324-ASM	BelaR1	Europe	Belarusians	Belarus	I2a1a2b1a1a2a	Y3118		Karmin et al. 2015
GS000014328-ASM	Komi1	NorthAsia	Komis	Russia	I	M170		Karmin et al. 2015
GS000014329-ASM	Komi2_dupl	NorthAsia	Komis	Russia	R1a1a1b1a2a	Z92		Karmin et al. 2015	in duplicate
GS000014330-ASM	Mord2	NorthAsia	Mordvins	Russia	R1a1a1b1a2b3a	CTS3402		Karmin et al. 2015
GS000014331-ASM	Mari1	NorthAsia	Maris	Russia	N1a1a1a	L708		Karmin et al. 2015
GS000014332-ASM	Mari3	NorthAsia	Maris	Russia	N1a2b2a1c~	L665		Karmin et al. 2015
GS000014333-ASM	YakS8	NorthAsia	Yakutian	Russia	N1a1a1a	L708		Karmin et al. 2015
GS000014335-ASM	Evnk2	NorthAsia	Evenks	Russia	C2a1a2b2~	B93	y	Karmin et al. 2015
GS000014351-ASM	BelaR3	Europe	Belarusians	Belarus	I2a1a2b1a1a2a	Y3118		Karmin et al. 2015
GS000014364-ASM	Tabas17	NorthAsia	Tabasarans	Russia	R1b1a1b1b	CTS1078		Karmin et al. 2015
GS000014366-ASM	Lezg3	NorthAsia	Lezgins	Russia	G2a1a1a2	FGC1159	y	Karmin et al. 2015
GS000014368-ASM	Kumk2	NorthAsia	Kumyks	Russia	J1a2b	CTS15		Karmin et al. 2015
GS000014405-ASM	Avar1	NorthAsia	Avars	Russia	J1a2b	CTS15		Karmin et al. 2015
GS000014406-ASM	Avar9	NorthAsia	Avars	Russia	R1b1a1b1b	CTS1078		Karmin et al. 2015
GS000014409-ASM	Abkhaz5	Cent/WestAsia	Abkhazians	Georgia	G2a1a1a1a1a1a1	Z7940		Karmin et al. 2015
GS000014410-ASM	Abkhaz6	Cent/WestAsia	Abkhazians	Georgia	J2a	M410		Karmin et al. 2015
GS000014413-ASM	Kabard4	NorthAsia	Kabardins	Russia	G2a2b2a1a1a2a2a	S9409		Karmin et al. 2015
GS000014414-ASM	NOsset2	NorthAsia	North-Ossetians	Russia	G2a1a1a1a1a1a1a2a~	FGC705	y	Karmin et al. 2015
GS000014415-ASM	Kaz1	Cent/WestAsia	Kazakhs	Kazakhstan	R1a1a1b2a1a2c	Y7		Karmin et al. 2015
GS000014416-ASM	RusPi1	NorthAsia	North-Russians	Russia	N1a1a1a1a	L392		Karmin et al. 2015
GS000014417-ASM	RVnch2	Cent/WestAsia	Rushan-Vanch	Tajikistan	R1a1a1b2	Z93		Karmin et al. 2015
GS000014418-ASM	Bur2	NorthAsia	Buryats	Russia	C2b1a1a1a1c~	B99	y	Karmin et al. 2015
GS000014421-ASM	Tabas4	NorthAsia	Tabasarans	Russia	J1a2b	CTS15	y	Karmin et al. 2015
GS000014474-ASM	Jord2	Cent/WestAsia	Jordanians	Jordan	J	M304		Karmin et al. 2015
GS000014475-ASM	Iran2	Cent/WestAsia	Iranians	Iran	G2a2a1a2	L91	y	Karmin et al. 2015
GS000015393-ASM	Ket2	NorthAsia	Kets	Russia	Q1b1a3	L334		Karmin et al. 2015
GS000015715-ASM	Mari2	NorthAsia	Maris	Russia	N1a1a1a	L708	y	Karmin et al. 2015
GS000015872-ASM	croat11	Europe	Croats	Bosnia-Herzegovina	Q1b	M346	y	Karmin et al. 2015
GS000015873-ASM	croat13	Europe	Croats	Bosnia-Herzegovina	I2a1a2b1a1a1	S17250		Karmin et al. 2015
GS000015874-ASM	Mord1	NorthAsia	Mordvins	Russia	R1b1a1b1a1a2a1b1	Z292		Karmin et al. 2015
GS000015875-ASM	Kryash4	NorthAsia	Babtized-Tatars	Russia	J2a1a1a2b2	M67	y	Karmin et al. 2015
GS000015879-ASM	NenetF3	NorthAsia	Forest-Nenets	Russia	N1a2b2a1c~	L665		Karmin et al. 2015
GS000016104-ASM	BelaR2	Europe	Belarusians	Belarus	I1	M253	y	Karmin et al. 2015
GS000016133-ASM	ISR31	Cent/WestAsia	Turkey-Jews	Turkey	R1b1a1b1b	CTS1078	y	Karmin et al. 2015
GS000016134-ASM	Bashk3	NorthAsia	Bashkirs	Russia	R1b1a1a1	M478		Karmin et al. 2015
GS000016135-ASM	ISR34	Cent/WestAsia	Druze	Israel	L1b1	M349	y	Karmin et al. 2015
GS000016136-ASM	ISR35	Cent/WestAsia	Druze	Israel	J1a2a1a2	P58		Karmin et al. 2015
GS000016138-ASM	ISR37	SouthAsia	Cochin-Jews	India	J2b2a1a1a1a1a1a	Z631	y	Karmin et al. 2015
GS000016139-ASM	ISR38	Europe	Ashkenazi-Jews	France	R1b1a1b1a1a2	P312		Karmin et al. 2015
GS000016162-ASM	NentT2	NorthAsia	Tundra-Nenets	Russia	N1a2b2a1c~	L665		Karmin et al. 2015
GS000016163-ASM	NentT1	NorthAsia	Tundra-Nenets	Russia	N1a2b2a1c~	L665		Karmin et al. 2015
GS000016165-ASM	EvenS1	NorthAsia	Evens	Russia	C2a1a2a1b2a~	B83	y	Karmin et al. 2015
GS000016166-ASM	EvenS2	NorthAsia	Evens	Russia	N1a1a1a	L708		Karmin et al. 2015
GS000016167-ASM	EvenS3	NorthAsia	Evens	Russia	N1a2b2a1c~	L665		Karmin et al. 2015
GS000016168-ASM	koryak33	NorthAsia	Koryaks	Russia	C2a1a2b1b1~	Z32991	y	Karmin et al. 2015
GS000016169-ASM	koryak42	NorthAsia	Koryaks	Russia	C2a1a2b1b2~	B95	y	Karmin et al. 2015
GS000016171-ASM	Balkar2	NorthAsia	Balkars	Russia	R1a1a1b2a2a1	Z2123		Karmin et al. 2015
GS000016174-ASM	Altai3	NorthAsia	Altai-Kizhi	Russia	R1a1a1b2	Z93		Karmin et al. 2015
GS000016177-ASM	Kyrgz1	Cent/WestAsia	Kyrgyz	Kyrgyzstan	J2a1a4b	L25		Karmin et al. 2015
GS000016179-ASM	Iran4	Cent/WestAsia	Iranians	Iran	E1b1b1a1a1b	V32		Karmin et al. 2015
GS000016180-ASM	Saudi1	Cent/WestAsia	Arabs	SaudiArabia	J1a2a1a2	P58		Karmin et al. 2015
GS000016181-ASM	Jord1	Cent/WestAsia	Jordanians	Jordan	J2b1	M205	y	Karmin et al. 2015
GS000016186-ASM	CoskK1	NorthAsia	Kuban-Cossacks	Russia	N1a1a1a1a2	Z1936	y	Karmin et al. 2015
GS000016187-ASM	KyrgzTJ2	Cent/WestAsia	Kyrgyz	Kyrgyzstan	R1a1a1b2	Z93		Karmin et al. 2015
GS000016188-ASM	RVnch1	Cent/WestAsia	Rushan-Vanch	Tajikistan	R1a1a1b2a2a1	Z2123		Karmin et al. 2015
GS000016189-ASM	Ishk1	Cent/WestAsia	Ishkasim	Tajikistan	R1a1a1b2	Z93		Karmin et al. 2015
GS000016190-ASM	Mong1	EastAsia	Mongol-Khalkh	Mongolia	N1a1a1a1a	L392		Karmin et al. 2015
GS000016191-ASM	Kyrgz2	Cent/WestAsia	Kyrgyz	Kyrgyzstan	R1a1a1b2	Z93		Karmin et al. 2015
GS000016192-ASM	Tajik1	Cent/WestAsia	Tajiks	Tajikistan	R1b	L278		Karmin et al. 2015
GS000016193-ASM	KyrgzTJ1	Cent/WestAsia	Kyrgyz	Kyrgyzstan	R1a1a1b2	Z93		Karmin et al. 2015
GS000016195-ASM	KyrgzTJ3	Cent/WestAsia	Kyrgyz	Kyrgyzstan	R1a1a1b2	Z93		Karmin et al. 2015
GS000016196-ASM	Ishk2	Cent/WestAsia	Ishkasim	Tajikistan	R1a1a1b2	Z93		Karmin et al. 2015
GS000016197-ASM	Kyrgz3	Cent/WestAsia	Kyrgyz	Kyrgyzstan	R1a1a1b2	Z93		Karmin et al. 2015
GS000016198-ASM	ISR01	Cent/WestAsia	Iraqi-Jews	Iraq	R1a1a1b2a2a1	Z2123		Karmin et al. 2015
GS000016206-ASM	CArab3	Cent/WestAsia	Arab-Christian	Israel	E1b1b1b2a1a~	M34	y	Karmin et al. 2015
GS000016207-ASM	ISR10	Europe	Ashkenazi-Jews	France	R1a1a1b2a2b1a	CTS6		Karmin et al. 2015
GS000016209-ASM	ISR12	Cent/WestAsia	Iraqi-Jews	Iraq	G2a2b2a1b	Z30527		Karmin et al. 2015
GS000016210-ASM	ISR13	Cent/WestAsia	Georgian-Jews	Georgia	T1a1a1b2b2b1a1a2	CTS6280		Karmin et al. 2015
GS000016212-ASM	MArab1	Cent/WestAsia	Arab-Muslim	Israel	T1a1a1b2b2b1a	P77	y	Karmin et al. 2015
GS000016213-ASM	MArab2	Cent/WestAsia	Arab-Muslim	Israel	J1a2a1a2	P58		Karmin et al. 2015
GS000016214-ASM	ISR21	Cent/WestAsia	Uzbekistan-Jews	Uzbekistan	E1b1b1b2a1a1	L29	y	Karmin et al. 2015
GS000016215-ASM	ISR22	Cent/WestAsia	Uzbekistan-Jews	Uzbekistan	G2a2a2	Z18064.2	y	Karmin et al. 2015
GS000016216-ASM	ISR23	Cent/WestAsia	Iranian-Jews	Iran	R2	L266	y	Karmin et al. 2015
GS000016217-ASM	CArab1	Cent/WestAsia	Arab-Christian	Israel	E1b1b1b2a1	M123		Karmin et al. 2015
GS000016276-ASM	Bashk4	NorthAsia	Bashkirs	Russia	R1a1a1b2a2a1	Z2123		Karmin et al. 2015
GS000016277-ASM	Saudi2	Cent/WestAsia	Arabs	SaudiArabia	J1a2a1a2	P58		Karmin et al. 2015
GS000016796-ASM	RusPs2	NorthAsia	Central-Russians	Russia	R1a1a1b1a2a	Z92		Karmin et al. 2015
GS000016797-ASM	RusRz1	NorthAsia	Central-Russians	Russia	R1a1a1b1a2a2a1a	YP350		Karmin et al. 2015
GS000016798-ASM	Thak1	SouthAsia	Thakur	India	R2	L266		Karmin et al. 2015
GS000016799-ASM	Gupta1	SouthAsia	Gupta	India	R1a1a1b2a1a2c	Y7		Karmin et al. 2015
GS000016800-ASM	Santh1	SouthAsia	Santhal	India	R2	L266		Karmin et al. 2015
GS000016801-ASM	Beng2	SouthAsia	West-Bengali	India	R1a1a1b2a1a2c	Y7		Karmin et al. 2015
GS000016802-ASM	Kapu1	SouthAsia	Kapu	India	J2a1a	L26		Karmin et al. 2015
GS000016803-ASM	Gond1	SouthAsia	Gond	India	O1b1a1a1b1c	B418	y	Karmin et al. 2015
GS000016804-ASM	Ho1	SouthAsia	Ho	India	O1b1a1a1b1a	B426		Karmin et al. 2015
GS000016805-ASM	Asur1	SouthAsia	Asur	India	H1a1a4b3b1a	Z5890		Karmin et al. 2015
GS000016806-ASM	Mal1	SouthAsia	Malayan	India	H3	Z5857	y	Karmin et al. 2015
GS000016807-ASM	Brahm2	SouthAsia	Brahmin	India	R2	L266		Karmin et al. 2015
GS000016808-ASM	OrMc1	SouthAsia	Odisha	India	R1a1a1b2a1a1a	Y6		Karmin et al. 2015
GS000016809-ASM	Brahm1	SouthAsia	Brahmin	India	R2	L266		Karmin et al. 2015
GS000016819-ASM	RusPs1	NorthAsia	Central-Russians	Russia	N1a1a1a1a1a1a	L550		Karmin et al. 2015
GS000016821-ASM	Kol1	SouthAsia	Kol	India	H1a1a4b2c1a	Z5882		Karmin et al. 2015
GS000016875-ASM	Iran3	Cent/WestAsia	Iranians	Iran	R1a1a1b2	Z93		Karmin et al. 2015
GS000016881-ASM	Israel43	Cent/WestAsia	Kurdistan-Jews	Iraq	R1b1a1b1b3a1	S17864		Karmin et al. 2015
GS000016882-ASM	Israel44	SouthAsia	Mumbai-Jews	India	J2b1	M205		Karmin et al. 2015
GS000016885-ASM	CArab2	Cent/WestAsia	Arab-Christian	Israel	R1b1a1b1a1a2	P312		Karmin et al. 2015
GS000016886-ASM	Israel48	Africa	Moroccan-Jews	Morocco	R1b1a1b1b	CTS1078		Karmin et al. 2015
GS000016887-ASM	Israel49	Cent/WestAsia	Yemen-Jews	Yemen	J1a2a1a2	P58		Karmin et al. 2015
GS000016891-ASM	Ger3	Europe	Germans	Germany	R1b1a1b1a1a2a	DF27		Karmin et al. 2015
GS000016899-ASM	Mold3	Europe	Moldavians	Moldova	G2a1a1a1	Z6692		Karmin et al. 2015
GS000016901-ASM	Hun2	Europe	Hungarians	Ukraine	I1a2a1a1a	Z141	y	Karmin et al. 2015
GS000016904-ASM	Lit2	Europe	Lithuanians	Lithuania	I2a1a2b1a1a2a	Y3118		Karmin et al. 2015
GS000016907-ASM	Est11	Europe	Estonians	Estonia	N1a1a1a1a1a1a	L550		Karmin et al. 2015
GS000016916-ASM	Est27	Europe	Estonians	Estonia	R1a1a1b1a2a	Z92		Karmin et al. 2015
GS000016935-ASM	Lebb2	SouthEastAsia	Lebbo	Indonesia	S1a1b1d	Z41502	y	Karmin et al. 2015
GS000016936-ASM	Lebb3	SouthEastAsia	Lebbo	Indonesia	C1b1a2a1~	B69	y	Karmin et al. 2015
GS000016937-ASM	Lebb4	SouthEastAsia	Lebbo	Indonesia	C1b1a2a2~	Z32798	y	Karmin et al. 2015
GS000016940-ASM	Cachi3	America	Andean-Calchaquíes	Argentina	Q1b1a1a	M3		Karmin et al. 2015
GS000016941-ASM	Bajo17	SouthEastAsia	Bajo	Indonesia	S1b~	B275	y	Karmin et al. 2015
GS000016942-ASM	Cachi5	America	Andean-Calchaquíes	Argentina	Q1b1a1a	M3		Karmin et al. 2015
GS000016945-ASM	Wichi3	America	Wichi,Andean-LA	Argentina	Q1b1a1a	M3		Karmin et al. 2015
GS000016946-ASM	Wichi4	America	Wichi,Andean-LA	Argentina	Q1b1a1a	M3	y	Karmin et al. 2015
GS000016951-ASM	Colla4	America	Colla,Andean-HA	Argentina	Q1b1a1a	M3		Karmin et al. 2015
GS000016965-ASM	PuMc1	SouthAsia	Punjabi	India	H1a2b	Z14258	y	Karmin et al. 2015
GS000016966-ASM	Kurmi1	SouthAsia	Kurmi	India	R1a1a1b2a1a1a	Y6		Karmin et al. 2015
GS000016967-ASM	Altai4	NorthAsia	Altai-Telengit	Russia	R1a1a1b2	Z93		Karmin et al. 2015
GS000016968-ASM	Tuva1	NorthAsia	Tuvinians	Russia	N1a2b2a1c~	L665		Karmin et al. 2015
GS000016970-ASM	Karel2	NorthAsia	Karelians	Russia	R1a1a1b1a2a	Z92		Karmin et al. 2015
GS000016971-ASM	Veps2	NorthAsia	Vepsas	Russia	N1a1a1a1a2	Z1936		Karmin et al. 2015
GS000016972-ASM	ISR40	Cent/WestAsia	Iraqi-Jews	Iraq	R1a1a1b2a1a2c	Y7		Karmin et al. 2015
GS000016973-ASM	ISR41	Cent/WestAsia	Yemenite-Jews	Yemen	J1a2a1a2	P58		Karmin et al. 2015
GS000016974-ASM	Israel42	SouthAsia	Mumbai-Jews	India	R1a1a1b2a2a1	Z2123		Karmin et al. 2015
GS000017004-ASM	Bajo2	SouthEastAsia	Bajo	Indonesia	C1b3a1c2a	Z32280	y	Karmin et al. 2015
GS000017005-ASM	Bajo19	SouthEastAsia	Bajo	Indonesia	C1b3a1d~	Z32837	y	Karmin et al. 2015
GS000017006-ASM	Bajo21	SouthEastAsia	Bajo	Indonesia	O2a2b2a2	F706	y	Karmin et al. 2015
GS000017007-ASM	Lebb1	SouthEastAsia	Lebbo	Indonesia	O1b1a1a1b1c	B418		Karmin et al. 2015
GS000017077-ASM	Cachi4	America	Andean-Calchaquíes	Argentina	Q1b1a1a	M3		Karmin et al. 2015
GS000017146-ASM	MPlc1	SouthAsia	Madhya-Pradesh-caste	India	C1b1a1a1a1a	K244	y	Karmin et al. 2015
GS000017169-ASM	Lebn1	Cent/WestAsia	Lebanese	Lebanon	N1a1a1a	L708	y	Karmin et al. 2015
GS000017203-ASM	Est23	Europe	Estonians	Estonia	N1a1a1a1a1a	CTS2929		Karmin et al. 2015
GS000017206-ASM	Est4	Europe	Estonians	Estonia	E1b1b1a1b1a	V13		Karmin et al. 2015
GS000017207-ASM	Est18	Europe	Estonians	Estonia	N1a1a1a1a2a1a1a1a1	Z1941	y	Karmin et al. 2015
GS000017208-ASM	Est6	Europe	Estonians	Estonia	N1a1a1a1a1a	CTS2929		Karmin et al. 2015
GS000017210-ASM	Est2	Europe	Estonians	Estonia	N1a1a1a1a1a1a	L550		Karmin et al. 2015
GS000017213-ASM	Est19	Europe	Estonians	Estonia	N1a1a1a1a2a1a1a1a1	Z1941		Karmin et al. 2015
GS000017214-ASM	Est21	Europe	Estonians	Estonia	N1a1a1a1a1a	CTS2929		Karmin et al. 2015
GS000017215-ASM	Est26	Europe	Estonians	Estonia	R1a1a1b1a2a	Z92		Karmin et al. 2015
GS000017219-ASM	Est24	Europe	Estonians	Estonia	N1a1a1a1a1a	CTS2929		Karmin et al. 2015
GS000017247-ASM	Tuva2	NorthAsia	Tuvinians	Russia	N1a2b2a1c~	L665	y	Karmin et al. 2015
GS000017380-ASM	Est17	Europe	Estonians	Estonia	N1a1a1a1a2a1a1a1a1	Z1941		Karmin et al. 2015
GS000017632-ASM	Veps3	NorthAsia	Vepsas	Russia	I2a1a2b1a1	CTS5966		Karmin et al. 2015
GS000018757-ASM	Est20	Europe	Estonians	Estonia	N1a1a1a1a2a1a1a1a1	Z1941		Karmin et al. 2015
GS000019901-ASM	Burm3	SouthEastAsia	Burmese	Myanmar	O2a2b1a1a1	F8		Karmin et al. 2015
GS000019902-ASM	Burm8	SouthEastAsia	Burmese	Myanmar	O2a2b1a1a1	F8		Karmin et al. 2015
GS000019903-ASM	Burm10	SouthEastAsia	Burmese	Myanmar	H	M3010	y	Karmin et al. 2015
GS000019904-ASM	Burm12	SouthEastAsia	Burmese	Myanmar	O2a2b1a1a1	F8		Karmin et al. 2015
GS000019905-ASM	Burm4	SouthEastAsia	Burmese	Myanmar	O2a2b1a1a1	F8		Karmin et al. 2015
GS000019906-ASM	Burm20	SouthEastAsia	Burmese	Myanmar	O2a2b1a1a1	F8		Karmin et al. 2015
GS000019946-ASM	VietN4	SouthEastAsia	Vietnamese	Vietnam	O1b1a1a1a1a1a1a1a1a	F3053		Karmin et al. 2015
GS000019949-ASM	VietS3	SouthEastAsia	Vietnamese	Vietnam	O1b1a1a1a1a1b2	Z24014		Karmin et al. 2015
GS000019950-ASM	VietS2	SouthEastAsia	Vietnamese	Vietnam	O1b1a1a1b1a2	B427		Karmin et al. 2015
GS000019953-ASM	Dusun7	SouthEastAsia	Dusun	Brunei	O1b1a1a1b	M1283		Karmin et al. 2015
GS000019959-ASM	AndT7	America	Colla,Andean-HA	Argentina	R1b1a1b1a1a2a	DF27		Karmin et al. 2015
GS000019960-ASM	AndS41	America	Colla,Andean-HA	Argentina	Q1b1a1a	M3		Karmin et al. 2015
GS000019961-ASM	AndT12	America	Colla,Andean-HA	Argentina	Q1b1a1a	M3		Karmin et al. 2015
GS000019966-ASM	Igrt1	SouthEastAsia	Igorot	Philippines	O2a2a1a2a	M209		Karmin et al. 2015
GS000019972-ASM	VietS1	SouthEastAsia	Vietnamese	Vietnam	O1b1a1a1b1a2	B427		Karmin et al. 2015
GS000019979-ASM	Dusun12	SouthEastAsia	Dusun	Brunei	O1b1a1a1b1b	Z39485		Karmin et al. 2015
GS000019981-ASM	Murut3	SouthEastAsia	Murut	Brunei	C1b1a2b2~	Z32804	y	Karmin et al. 2015
GS000019983-ASM	Murut6	SouthEastAsia	Murut	Brunei	O1a2a1	B392		Karmin et al. 2015
GS000019985-ASM	Murut13	SouthEastAsia	Murut	Brunei	O1a2a1a	B393	y	Karmin et al. 2015
GS000019986-ASM	Murut19	SouthEastAsia	Murut	Brunei	Q1a1a	M120	y	Karmin et al. 2015
GS000019988-ASM	AndT13	America	Colla,Andean-HA	Argentina	R1b1a1b1a1a2a	DF27		Karmin et al. 2015
GS000019989-ASM	AndS11	America	Colla,Andean-HA	Argentina	Q1b1a1a	M3		Karmin et al. 2015
GS000019992-ASM	Krk116	NorthAsia	Koryaks	Russia	C2a1a4c~	Z32849	y	Karmin et al. 2015
GS000019993-ASM	Krk119	NorthAsia	Koryaks	Russia	C2a1a2b1a~	B94	y	Karmin et al. 2015
GS000019997-ASM	Esk2	NorthAsia	Eskimo	Russia	Q1b1a1a	M3	y	Karmin et al. 2015
GS000019998-ASM	Esk3	NorthAsia	Eskimo	Russia	N1a1a1a1a	L392		Karmin et al. 2015
GS000020001-ASM	Chuk5	NorthAsia	Chukchis	Russia	N1a1a1a1a	L392		Karmin et al. 2015
GS000020002-ASM	Chuk9	NorthAsia	Chukchis	Russia	N1a1a1a1a	L392		Karmin et al. 2015
GS000020004-ASM	Evk14	NorthAsia	Evenks	Russia	C2a1a2a1a1b~	Z32860	y	Karmin et al. 2015
GS000020108-ASM	Evk55	NorthAsia	Evenks	Russia	N1a2b2a1c~	L665		Karmin et al. 2015
GS000020110-ASM	Evn31	NorthAsia	Evens	Russia	N1a1a1a1a1a1a	L550		Karmin et al. 2015
GS000020113-ASM	Bur383	NorthAsia	Buryats	Russia	C2b1a1a1a1a3~	B104	y	Karmin et al. 2015
GS000020126-ASM	Bur530	NorthAsia	Buryats	Russia	C2a1a2a1a1c~	B88	y	Karmin et al. 2015
GS000020129-ASM	EvenM1	NorthAsia	Evens	Russia	C2a1a2a1b2b2~	B85	y	Karmin et al. 2015
GS000020270-ASM	Burm14	SouthEastAsia	Burmese	Myanmar	H1a1b1	Z4487	y	Karmin et al. 2015
GS000020271-ASM	Dusun8	SouthEastAsia	Dusun	Brunei	C1b1b~	B68	y	Karmin et al. 2015
GS000020272-ASM	Murut5	SouthEastAsia	Murut	Brunei	C1b1a2b1a1~	B74	y	Karmin et al. 2015	in duplicate
GS000020273-ASM	AndS23	America	Colla,Andean-HA	Argentina	Q1b1a1a	M3		Karmin et al. 2015
GS000020274-ASM	AndS47	America	Colla,Andean-HA	Argentina	Q1b1a1a	M3		Karmin et al. 2015
GS000020490-ASM	YakK3	NorthAsia	Yakuts	Russia	N1a1a1a	L708	y	Karmin et al. 2015
GS000020491-ASM	Bur406	NorthAsia	Buryats	Russia	N1a1a1a1a	L392		Karmin et al. 2015
GS000022066-ASM	Bur318	NorthAsia	Buryats	Russia	C2b1a1a1a1a5b~	B107	y	Karmin et al. 2015
GS000022067-ASM	KrkG11	NorthAsia	Koryaks	Russia	Q1a1	F746		Karmin et al. 2015
GS000022068-ASM	KrkG152	NorthAsia	Koryaks	Russia	N1a1a1a1a	L392		Karmin et al. 2015
GS000022069-ASM	KrkG233	NorthAsia	Koryaks	Russia	N1a1a1a1a	L392		Karmin et al. 2015
GS000022071-ASM	KrkG3	NorthAsia	Koryaks	Russia	C2a1a1b2~	B77	y	Karmin et al. 2015
GS000022072-ASM	KrkG55	NorthAsia	Koryaks	Russia	Q1a1	F746		Karmin et al. 2015
GS000022076-ASM	YakM1	NorthAsia	Yakuts	Russia	N1a1a1a	L708		Karmin et al. 2015
GS000022077-ASM	Bur336	NorthAsia	Buryats	Russia	N1a1a1a1a	L392		Karmin et al. 2015
GS000022090-ASM	Bur350	NorthAsia	Buryats	Russia	C2b1a1a1a1a1~	Z31857	y	Karmin et al. 2015
GS000022091-ASM	Bur355	NorthAsia	Buryats	Russia	C2b1a1a1a1b~	B100	y	Karmin et al. 2015
GS000022092-ASM	Bur361	NorthAsia	Buryats	Russia	C2b1a1a1a1a4~	Z31865	y	Karmin et al. 2015
GS000022093-ASM	Bur398	NorthAsia	Buryats	Russia	C2b1a1a1a1a5a~	Z31872	y	Karmin et al. 2015
GS000022094-ASM	Bur578	NorthAsia	Buryats	Russia	C2b1a1a1a1a	Z33003	y	Karmin et al. 2015
GS000022099-ASM	Murut5_duplicate	SouthEastAsia	Murut	Brunei	C1b1a2b1a~	Z32823		Karmin et al. 2015	in duplicate
GS000022100-ASM	Burm15	SouthEastAsia	Burmese	Myanmar	O2a2b1a2a1a	F46		Karmin et al. 2015
GS000022292-ASM	EvenM3	NorthAsia	Evens	Russia	C2a1a2a1b2b1~	B84	y	Karmin et al. 2015
GS000022293-ASM	EvenM2	NorthAsia	Evens	Russia	C2a1a2a1b1	B471	y	Karmin et al. 2015
GS000022438-ASM	Shor1	NorthAsia	Shor	Russia	N1a1a	M178	y	Karmin et al. 2015
GS000022439-ASM	Altai5	NorthAsia	Altai-Kizhi	Russia	R1a1a1b2	Z93		Karmin et al. 2015
GS000022440-ASM	Altai6	NorthAsia	Altai-Kizhi	Russia	C2a1a1b1a1~	Z32844	y	Karmin et al. 2015
GS000022441-ASM	YakK4	NorthAsia	Yakuts	Russia	N1a2b2a1c~	L665		Karmin et al. 2015
GS000033948-ASM	KrkG294	NorthAsia	Koryaks	Russia	N1a1a1a1a	L392		Karmin et al. 2015
GS000034185-ASM	KrkG13	NorthAsia	Koryaks	Russia	Q1a1	F746		Karmin et al. 2015
GS000034297-ASM	Evn21	NorthAsia	Evens	Russia	C2a1a2a1b1	B471	y	Karmin et al. 2015
GS000034970-ASM	KrkG14	NorthAsia	Koryaks	Russia	Q1a1	F746	y	Karmin et al. 2015
GS000035017-ASM	Udmrd4	NorthAsia	Udmurds	Russia	N1a1a1a	L708		Karmin et al. 2015
GS000035018-ASM	Komi2	NorthAsia	Komi-Zyrian	Russia	R1a1a1b1a2a	Z92		Karmin et al. 2015	in duplicate
GS000035021-ASM	Alban1	Europe	Albanians	Albania	E1b1b1a1b1a	V13		Karmin et al. 2015
GS000035024-ASM	Saami4	Europe	Saami	Norway	N1a1a1a1a1a	CTS2929		Karmin et al. 2015
GS000035025-ASM	Saami5	Europe	Saami	Norway	N1a1a1a1a1a	CTS2929		Karmin et al. 2015
GS000035026-ASM	Saami6	Europe	Saami	Norway	R1a1a1b1a3a	Z284	y	Karmin et al. 2015
GS000035027-ASM	Lat2	Europe	Latvians	Latvia	N1a1a1a1a1a1a	L550		Karmin et al. 2015
GS000035030-ASM	Uzbk3	Cent/WestAsia	Uzbek	Uzbekistan	Q1b1a3a1~	L332	y	Karmin et al. 2015
GS000035034-ASM	Bangl1	SouthAsia	Bangladeshi	Bangladesh	H1a1a4b2	M2853		Karmin et al. 2015
GS000035035-ASM	Bangl2	SouthAsia	Bangladeshi	Bangladesh	H1a2b	Z14258	y	Karmin et al. 2015
GS000035037-ASM	NplTA1	SouthAsia	Tamang	India	D1a1a1a1b1~	Z31625	y	Karmin et al. 2015
GS000035038-ASM	NepBr1	SouthAsia	Nepali	Nepal	Q1b	M346		Karmin et al. 2015
GS000035039-ASM	Khsat1	SouthAsia	Kshatriya	India	H1a1a4b3b1a	Z5890		Karmin et al. 2015
GS000035041-ASM	Hun_3	Europe	Hungarians	Ukraine	R1a1a1b1a2b3a	CTS3402		Karmin et al. 2015
GS000035109-ASM	Swe1	Europe	Swedes	Sweden	R1a1a1b1a3a2a1	Z87		Karmin et al. 2015
GS000035113-ASM	Cirkas2	NorthAsia	Circassians	Russia	R1a1a1b1a1a1c	CTS11962.1		Karmin et al. 2015
GS000035114-ASM	Cirkas3	NorthAsia	Circassians	Russia	R1a1a1b2a2a1	Z2123		Karmin et al. 2015
GS000035115-ASM	Kabard3	NorthAsia	Kabardins	Russia	J2a1a4b	L25		Karmin et al. 2015
GS000035116-ASM	Mong2	EastAsia	Mongol-Khalkh	Mongolia	N1a1a1a1a	L392		Karmin et al. 2015
GS000035117-ASM	Mong3	EastAsia	Mongol-Zakhchin	Mongolia	C2a1a2a1a2~	B470	y	Karmin et al. 2015
GS000035118-ASM	TrkUzb1	Cent/WestAsia	Turkmens	Uzbekistan	Q1a2a1a~	L713		Karmin et al. 2015
GS000035119-ASM	TrkUzb2	Cent/WestAsia	Turkmens	Uzbekistan	Q1a2a1a~	L713		Karmin et al. 2015
GS000035120-ASM	TrkUzb3	Cent/WestAsia	Turkmens	Uzbekistan	Q1a2a1a~	L713		Karmin et al. 2015
GS000035121-ASM	UkrnE1	Europe	Ukrainians	Ukraine	R1a1a1b1a2a2a1a	YP350		Karmin et al. 2015
GS000035123-ASM	Balija1	SouthAsia	Balija	India	H1a2b	Z14258	y	Karmin et al. 2015
GS000035124-ASM	Armen2	Cent/WestAsia	Armenians	Armenia	J1a2a1a2	P58		Karmin et al. 2015
GS000035125-ASM	Armen5	Cent/WestAsia	Armenians	Armenia	J1a2a1a2	P58		Karmin et al. 2015
GS000035126-ASM	Armen4	Cent/WestAsia	Armenians	Armenia	J1a2a1a2	P58	y	Karmin et al. 2015
GS000035127-ASM	Kaz3	Cent/WestAsia	Kazakhs	Kazakhstan	N1a1a1a1a	L392		Karmin et al. 2015
GS000035147-ASM	Alban2	Europe	Albanians	Albania	J2b2a1a1a1a1a	Z1297	y	Karmin et al. 2015
GS000035148-ASM	Lat3	Europe	Latvians	Latvia	N1a1a1a1a1a1a1a2a	L591		Karmin et al. 2015
GS000035149-ASM	Karel3	NorthAsia	Karelians	Russia	N1a1a1a1a2a1a1a	CTS1737		Karmin et al. 2015
GS000035150-ASM	Georg1	Cent/WestAsia	Georgians	Georgia	I2a2b	Z26381		Karmin et al. 2015
GS000035173-ASM	Armen1	Cent/WestAsia	Armenians	Armenia	R1b1a1b1b	CTS1078		Karmin et al. 2015
GS000035174-ASM	UkrnE2	Europe	Ukrainians	Ukraine	R1a1a1b1a2b3a	CTS3402		Karmin et al. 2015
GS000035175-ASM	UkrnW1	Europe	Ukrainians	Ukraine	R1b1a1b1a1a1b1a	Z372		Karmin et al. 2015
GS000035176-ASM	UkrnE3	Europe	Ukrainians	Ukraine	R1a1a1b1a2b3a	CTS3402		Karmin et al. 2015
GS000035177-ASM	UkrnW2	Europe	Ukrainians	Ukraine	R1a1a1b1a2a	Z92		Karmin et al. 2015
GS000035178-ASM	UkrnW3	Europe	Ukrainians	Ukraine	R1a1a1b1a2b1	P278.2		Karmin et al. 2015
GS000035179-ASM	CoskK2	NorthAsia	Kuban-Cossacks	Russia	R1a1a1b1a2b3a	CTS3402		Karmin et al. 2015
GS000035234-ASM	Mong4	EastAsia	Mongol-Khalkh	Mongolia	R1b1a1a1	M478	y	Karmin et al. 2015
GS000035235-ASM	Mong5	EastAsia	Mongol-Khalkh	Mongolia	N1a2b2a1c~	L665		Karmin et al. 2015
GS000035236-ASM	Mong6	EastAsia	Mongol-Khalkh	Mongolia	N1a1a1a1a	L392		Karmin et al. 2015
GS000035237-ASM	Azerb24	Cent/WestAsia	Azerbaijanis	Azerbaijan	R1a1a1b2a2a1	Z2123		Karmin et al. 2015
GS000035238-ASM	Cosk1	Europe	Cossacks	Ukraine	R1a1a1b1a1a1c	CTS11962.1		Karmin et al. 2015
GS000035239-ASM	Cosk2	Europe	Cossacks	Ukraine	R1a1a1b2	Z93		Karmin et al. 2015
GS000035240-ASM	Swe2	Europe	Swedes	Sweden	R1a1a1b1a3a2	Z287		Karmin et al. 2015
GS000035244-ASM	Veps4	NorthAsia	Vepsas	Russia	N1a2b2a1c~	L665	y	Karmin et al. 2015
GS000035245-ASM	CongPy1	Africa	Congo-pygmies	Congo	E1b1a1a1a1c1a1a	P252		Karmin et al. 2015
GS000035246-ASM	CongPy3	Africa	Congo-pygmies	Congo	B2a1a1	M218	y	Karmin et al. 2015
GS000035248-ASM	Agta3	SouthEastAsia	Agta	Philippines	O1a1a1a	F140		Karmin et al. 2015
GS000035249-ASM	Aeta1	SouthEastAsia	Aeta	Philippines	S2a~	B276	y	Karmin et al. 2015
GS000035250-ASM	Aeta2	SouthEastAsia	Aeta	Philippines	S2b~	Z33751	y	Karmin et al. 2015
GS000035251-ASM	Batak1	SouthEastAsia	Batak	Philippines	O1a2a1a	B393		Karmin et al. 2015
GS000035252-ASM	Batak2	SouthEastAsia	Batak	Philippines	O1a2a	F3288	y	Karmin et al. 2015
GS000035253-ASM	Batak3	SouthEastAsia	Batak	Philippines	O2a2b2a2	F706		Karmin et al. 2015
GS000035255-ASM	Koinb2	Oceania	Koinanbe	PapuaNewGuinea	C1b3a1c1a~	B462	y	Karmin et al. 2015
GS000035256-ASM	Kosip1	Oceania	Kosipe	PapuaNewGuinea	M1a3b1c1~	B271	y	Karmin et al. 2015
GS000035257-ASM	Aeta3	SouthEastAsia	Aeta	Philippines	C1b1a2b1b~	Z32218	y	Karmin et al. 2015
GS000035258-ASM	Koinb3	Oceania	Koinanbe	PapuaNewGuinea	C1b3a1c1b1~	B463	y	Karmin et al. 2015
GS000035260-ASM	Kosip2	Oceania	Kosipe	PapuaNewGuinea	M1a3b1d~	Z33743	y	Karmin et al. 2015
GS000035365-ASM	Kosip3	Oceania	Kosipe	PapuaNewGuinea	M1a3b1c2~	B270		Karmin et al. 2015
GS000035392-ASM	Agta1	SouthEastAsia	Agta	Philippines	P	P295	y	Karmin et al. 2015
GS000035432-ASM	Udmrd3	NorthAsia	Udmurds	Russia	N1a2b2a1c~	L665		Karmin et al. 2015
GS000035434-ASM	Alban3	Europe	Albanians	Albania	J1a2a1a2	P58		Karmin et al. 2015
GS000035435-ASM	Agta2	SouthEastAsia	Agta	Philippines	O1a1b	CTS5726	y	Karmin et al. 2015
GS000035685-ASM	Georg2	Cent/WestAsia	Georgians-Imeretins	Georgia	J2a1a1a2b2	M67		Karmin et al. 2015
GS000035686-ASM	Koinb1	Oceania	Koinanbe	PapuaNewGuinea	C1b3a1c1b2~	B464	y	Karmin et al. 2015
HG00096	HG00096	Europe	GBR	GreatBritain	R1b1a1b1a1a2c1a1f1a2	S691		Polaris
HG00098	HG00098	Europe	GBR	GreatBritain	R1b1a1b1a1a2a1a1a1	Z278		Polaris
HG00101	HG00101	Europe	GBR	GreatBritain	I1a2a1a	Z62		Polaris
HG00103	HG00103	Europe	GBR	GreatBritain	R1b1a1b1a1a2c1a2b2a	CTS3087		Polaris
HG00107	HG00107	Europe	GBR	GreatBritain	R1b1a1b1a1a2a	DF27		Polaris
HG00108	HG00108	Europe	GBR	GreatBritain	R1b1a1b1a1a1b1a	Z372		Polaris
HG00109	HG00109	Europe	GBR	GreatBritain	R1a1a1b1a3a2	Z287		Polaris
HG00115	HG00115	Europe	GBR	GreatBritain	R1b1a1b1a1a2c1a1f	S730		Polaris
HG00116	HG00116	Europe	GBR	GreatBritain	R1b1a1b1a1a2c1a5b1a1a2b	Z16539		Polaris
HG00117	HG00117	Europe	GBR	GreatBritain	I1	M253		Polaris
HG00119	HG00119	Europe	GBR	GreatBritain	R1b1a1b1a1a2c1a1f	S730		Polaris
HG00131	HG00131	Europe	GBR	GreatBritain	R1b1a1b1a1a1c2b1b	Z159		Polaris
HG00136	HG00136	Europe	GBR	GreatBritain	I2a1b1a2b1a2a1a1a1	Z180		Polaris
HG00139	HG00139	Europe	GBR	GreatBritain	R1b1a1b1a1a2e1	DF88		Polaris
HG00181	HG00181	Europe	FIN	Finland	J1a2a1a2c1a1	L816		Polaris
HG00185	HG00185	Europe	FIN	Finland	N1a1a1a1a2a1a1a1a1a	Z1940		Polaris
HG00190	HG00190	Europe	FIN	Finland	I1a1b1a4a2	L813		Polaris	in duplicate
HG00256	HG00256	Europe	GBR	England	R1b1a1b1a1a1c1	Z156		Polaris
HG00264	HG00264	Europe	GBR	GreatBritain	R1b1a1b1a1a2a	DF27		Polaris
HG00267	HG00267	Europe	FIN	Finland	R1b1a1b1a1a1c2b2a1b1a4b1a1a	CTS7080		Polaris
HG00273	HG00273	Europe	FIN	Finland	N1a1a1a1a2a1a1a1a1a	Z1940		Polaris
HG00277	HG00277	Europe	FIN	Finland	R1a1a1b1a2a	Z92		Polaris
HG00280	HG00280	Europe	FIN	Finland	N1a1a1a1a1a	CTS2929		Polaris
HG00284	HG00284	Europe	FIN	Finland	N1a1a1a1a2a1a1a	CTS1737		Polaris
HG00351	HG00351	Europe	FIN	Finland	N1a1a1a1a1a1a	L550		Polaris
HG00358	HG00358	Europe	FIN	Finland	N1a1a1a1a2a1a1a1a1a	Z1940		Polaris
HG00366	HG00366	Europe	FIN	Finland	R1a1a1b1a2b3a	CTS3402		Polaris
HG00369	HG00369	Europe	FIN	Finland	N1a1a1a1a1a	CTS2929		Polaris
HG00371	HG00371	Europe	FIN	Finland	N1a1a1a1a2a1a1a	CTS1737		Polaris
HG00372	HG00372	Europe	FIN	Finland	I1a1b1a4a1a1	L258		Polaris
HG00436	HG00436	EastAsia	CHS	China	O2a1b1a1a1a1a1a1a1a	F856		Polaris
HG00448	HG00448	EastAsia	CHS	China	O2a1a1a	Page124	y	Polaris
HG00583	HG00583	EastAsia	CHS	China	O2a2b1a2a1a	F46		Polaris
HG00589	HG00589	EastAsia	CHS	China	O2a2b1a2a1a	F46		Polaris
HG00595	HG00595	EastAsia	CHS	China	O1a1a1a1a1a1	CTS2498		Polaris
HG00610	HG00610	EastAsia	CHS	China	O2a1b1a2a	F238	y	Polaris
HG00613	HG00613	EastAsia	CHS	China	O2a1b1a1a1a1a1a1a1a	F856		Polaris
HG00650	HG00650	EastAsia	CHS	China	O2a2a1a1a	M159		Polaris
HG00656	HG00656	EastAsia	CHS	China	O2a2a1a1a	M159		Polaris
HG00662	HG00662	EastAsia	CHS	China	O2a2a1a1a	M159		Polaris
HG00683	HG00683	EastAsia	CHS	China	O2a2b1a2a1a	F46		Polaris
HG00844	HG00844	EastAsia	CDX	China	O1b1a1a1a1a1b	F2890		Polaris
HG00881	HG00881	EastAsia	CDX	China	O2a2b1a1a1	F8		Polaris
HG00982	HG00982	EastAsia	CDX	China	O1b1a1a1a1b1b	CTS651	y	Polaris
HG01190	HG01190	America	PUR	PuertoRico	T1a1a1b2b2b1a1a2	CTS6280	y	Polaris
HG01619	HG01619	Europe	IBS	Spain	J2b1	M205		Polaris
HG01624	HG01624	Europe	IBS	Spain	R1b1a1b1a1a2a1a1a1a	Z214		Polaris
HG01625	HG01625	Europe	IBS	Spain	R1b1a1b1a1a2b1c1a	Z51		Polaris
HG01630	HG01630	Europe	IBS	Spain	R1b1a1b1a1a2a1a1a1	Z278		Polaris
HG01682	HG01682	Europe	IBS	Spain	R1b1a1b1a1a2a	DF27		Polaris
HG01686	HG01686	Europe	IBS	Spain	J1a2a1a2	P58		Polaris
HG01708	HG01708	Europe	IBS	Spain	R1b1a1b1a1a2a	DF27		Polaris
HG01756	HG01756	Europe	IBS	Spain	J2a1a1b2a1b1	L70	y	Polaris
HG01761	HG01761	Europe	IBS	Spain	R1b1a1b1a1a2a1b3	CTS4188		Polaris
HG01771	HG01771	Europe	IBS	Spain	R1b1a1b1a1a2a	DF27		Polaris
HG02017	HG02017	SouthEastAsia	KHV	Vietnam	O1a1a1b1b	Z23392		Polaris
HG02040	HG02040	SouthEastAsia	KHV	Vietnam	F*	M89		1K Genomes Project (Poznik et al. 2016)
HG02070	HG02070	SouthEastAsia	KHV	Vietnam	O2a1b1a1a1a1f1a	CTS5409		Polaris
HG02073	HG02073	SouthEastAsia	KHV	Vietnam	O2a2a1a2a1a1	F1275		Polaris
HG02076	HG02076	SouthEastAsia	KHV	Vietnam	O1b1a2c	CTS9996	y	Polaris
HG02131	HG02131	SouthEastAsia	KHV	Vietnam	O2a2a1a2a1b	F2079	y	Polaris
HG02356	HG02356	EastAsia	CDX	China	O1b1a1a1a1a1a1a2a	Z39410		Polaris
HG02372	HG02372	EastAsia	CDX	China	O2a2b1a1a1	F8		Polaris
HG02373	HG02373	EastAsia	CDX	China	C2b1b1a1b~	F12814	y	Polaris
HG02374	HG02374	EastAsia	CDX	China	O1b1a1a1a1b2a	F4229		Polaris
HG02375	HG02375	EastAsia	CDX	China	O2a2b1a1a1	F8		Polaris
HG02381	HG02381	EastAsia	CDX	China	C2b1b1a1b~	F12814	y	Polaris
HG02383	HG02383	EastAsia	CDX	China	O2a2b1a1a1	F8		Polaris
HG02384	HG02384	EastAsia	CDX	China	O1a1a1a1a1a1a	F656		Polaris
HG02385	HG02385	EastAsia	CDX	China	O1a1a2a1a	Z23266		Polaris
HG02386	HG02386	EastAsia	CDX	China	O1b1a1a1a1a1a1a1	F923		Polaris
HG02388	HG02388	EastAsia	CDX	China	O2a2b1a1a1	F8		Polaris
HG02391	HG02391	EastAsia	CDX	China	O2a2b1a1a1	F8		Polaris
HG02409	HG02409	EastAsia	CDX	China	O1b1a1a1a1b2a	F4229		Polaris
HG02512	HG02512	SouthEastAsia	KHV	Vietnam	O1b1a1a1a1a1a1a1a1a1	F1399		Polaris
HG02521	HG02521	SouthEastAsia	KHV	Vietnam	O1b1a1a1a1a1a1a2	Z24091		Polaris
HG02524	HG02524	SouthEastAsia	KHV	Vietnam	Q1a1a	M120		Polaris
HG02561	HG02561	Africa	GWD	Gambia	E1b1a1a1a1c2c3a3	Z6019		Polaris
HG02613	HG02613	Africa	GWD	Gambia	A1a	M31		1K Genomes Project (Poznik et al. 2016)
HG02620	HG02620	Africa	GWD	Gambia	E1b1a1a1a1c2c2	Z6010		Polaris
HG02645	HG02645	Africa	GWD	Gambia	A1a	M31		1K Genomes Project (Poznik et al. 2016)
HG02666	HG02666	Africa	GWD	Gambia	A1a	M31		1K Genomes Project (Poznik et al. 2016)
HG02684	HG02684	SouthAsia	PJL	Pakistan	H3b	Z13871		1K Genomes Project (Poznik et al. 2016)
HG02721	HG02721	Africa	GWD	Gambia	E1b1a1a1a2a	U175		Polaris
HG02768	HG02768	Africa	GWD	Gambia	E1b1a1a1a1c2c3a1a	Z6014		Polaris
HG02771	HG02771	Africa	GWD	Gambia	E2b1a	M85	y	Polaris
HG02786	HG02786	SouthAsia	PJL	Pakistan	H1a1a4a	Z14665		1K Genomes Project (Poznik et al. 2016)
HG02851	HG02851	Africa	GWD	Gambia	E1b1a1a1a1c2a1	Z6004		Polaris
HG02973	HG02973	Africa	ESN	Nigeria	E1b1a1a1a2a1	M4254		Polaris
HG02982	HG02982	Africa	GWD	Gambia	A0a1	V153	y	Polaris
HG03039	HG03039	Africa	GWD	Gambia	E1b1a1a1a1c2c3a1b	Z6015		Polaris
HG03063	HG03063	Africa	MSL	SierraLeone	E1b1a1b1	Z22132		Polaris
HG03069	HG03069	Africa	MSL	SierraLeone	E1b1a1b1	Z22132	y	Polaris
HG03096	HG03096	Africa	MSL	SierraLeone	E1a2a1	CTS10935		Polaris
HG03100	HG03100	Africa	ESN	Nigeria	E1b1a1a1a2a1	M4254		Polaris	in duplicate
HG03120	HG03120	Africa	ESN	Nigeria	E1b1a1a1a2a1	M4254		Polaris
HG03130	HG03130	Africa	ESN	Nigeria	E1b1a1a1a2a1	M4254		Polaris
HG03169	HG03169	Africa	ESN	Nigeria	E1b1a1a1a2a1	M4254		Polaris
HG03228	HG03228	SouthAsia	PJL	Pakistan	C1b1a1b2~	Z31779		1K Genomes Project (Poznik et al. 2016)
HG03246	HG03246	Africa	GWD	Gambia	E1a2b1a1a1	Z14898	y	Polaris
HG03301	HG03301	Africa	ESN	Nigeria	E1b1a1a1a1c1a1	M191		Polaris
HG03307	HG03307	Africa	ESN	Nigeria	E1b1a1a1a1c1a1a	P252		Polaris
HG03445	HG03445	Africa	MSL	SierraLeone	E1b1a1a1a1c2a	Z6003		Polaris
HG03451	HG03451	Africa	MSL	SierraLeone	E1b1a1a1a2a1a3b1a	U290		Polaris
HG03484	HG03484	Africa	MSL	SierraLeone	E1b1a1a1a2a1a3b1a	U290		Polaris
HG03521	HG03521	Africa	ESN	Nigeria	E1b1a1a1a2a1	M4254		Polaris
HG03574	HG03574	Africa	MSL	SierraLeone	E1b1a1a1a1c1b1	CTS3393	y	Polaris
HG03577	HG03577	Africa	MSL	SierraLeone	G2a2b2a1a1c1a1a2a1	Z6523		Polaris
HG03582	HG03582	Africa	MSL	SierraLeone	E1b1a1a1a1c1b1	CTS3393		Polaris
HG03594	HG03594	SouthAsia	BEB	Bangladesh	H1a2b1a	Z5868		1K Genomes Project (Poznik et al. 2016)
HG03600	HG03600	SouthAsia	BEB	Bangladesh	H1a1a4b2c1a	Z5882		1K Genomes Project (Poznik et al. 2016)
HG03644	HG03644	SouthAsia	STU	SriLanka	H1a1a4b3b1a	Z5890		1K Genomes Project (Poznik et al. 2016)
HG03680	HG03680	SouthAsia	STU	SriLanka	H3a2b	Z5858		1K Genomes Project (Poznik et al. 2016)
HG03697	HG03697	SouthAsia	STU	SriLanka	H3b1	Z5859		1K Genomes Project (Poznik et al. 2016)
HG03716	HG03716	SouthAsia	ITU	India	H1a1a4b2	M2853		1K Genomes Project (Poznik et al. 2016)
HG03755	HG03755	SouthAsia	STU	SriLanka	H1a1a4b2b1	Z5879		1K Genomes Project (Poznik et al. 2016)
HG03777	HG03777	SouthAsia	ITU	India	H1a1a4b2c1a1	Z14430		1K Genomes Project (Poznik et al. 2016)
HG03778	HG03778	SouthAsia	ITU	India	H1a1a4b	M2716		1K Genomes Project (Poznik et al. 2016)
HG03792	HG03792	SouthAsia	ITU	India	H3a2a2	Z5862		1K Genomes Project (Poznik et al. 2016)
HG03800	HG03800	SouthAsia	BEB	Bangladesh	H1a1a4b3b1a	Z5890		1K Genomes Project (Poznik et al. 2016)
HG03815	HG03815	SouthAsia	BEB	Bangladesh	H1a1a4b2a	Z14448		1K Genomes Project (Poznik et al. 2016)
HG03824	HG03824	SouthAsia	BEB	Bangladesh	H1a1a1	Z14668		1K Genomes Project (Poznik et al. 2016)
HG03837	HG03837	SouthAsia	STU	SriLanka	H3a2b	Z5858		1K Genomes Project (Poznik et al. 2016)
HG03848	HG03848	SouthAsia	STU	SriLanka	H3a2a1	Z12646		1K Genomes Project (Poznik et al. 2016)
HG03867	HG03867	SouthAsia	ITU	India	C1b1a1a1a1b~	Z31727		1K Genomes Project (Poznik et al. 2016)
HG03872	HG03872	SouthAsia	ITU	India	H3a1	Z13196		1K Genomes Project (Poznik et al. 2016)
HG03890	HG03890	SouthAsia	STU	SriLanka	H3b1	Z5859		1K Genomes Project (Poznik et al. 2016)
HG03941	HG03941	SouthAsia	BEB	Bangladesh	H1a1a4b2	M2853		1K Genomes Project (Poznik et al. 2016)
HG03950	HG03950	SouthAsia	STU	SriLanka	H1a1a4b3b1a	Z5890		1K Genomes Project (Poznik et al. 2016)
HG03965	HG03965	SouthAsia	ITU	India	H3a2a1a	Z16780		1K Genomes Project (Poznik et al. 2016)
HG04006	HG04006	SouthAsia	STU	SriLanka	H1a1a4b2c1	Z14441		1K Genomes Project (Poznik et al. 2016)
HG04161	HG04161	SouthAsia	BEB	Bangladesh	H1a1a4b3b1a	Z5890		1K Genomes Project (Poznik et al. 2016)
HG04164	HG04164	SouthAsia	BEB	Bangladesh	H1a1a4a	Z14665		1K Genomes Project (Poznik et al. 2016)
HG04176	HG04176	SouthAsia	BEB	Bangladesh	H1a1a4b3b1	Z5889		1K Genomes Project (Poznik et al. 2016)
HG04188	HG04188	SouthAsia	BEB	Bangladesh	H1a1b	Z4469		1K Genomes Project (Poznik et al. 2016)
HG04198	HG04198	SouthAsia	ITU	India	H1a2a	Apt		1K Genomes Project (Poznik et al. 2016)
HG04206	HG04206	SouthAsia	ITU	India	H1a1a4b3b1a	Z5890		1K Genomes Project (Poznik et al. 2016)
HG04211	HG04211	SouthAsia	ITU	India	H1a1a4b2	M2853		1K Genomes Project (Poznik et al. 2016)
HG04222	HG04222	SouthAsia	ITU	India	H1a2a	Apt		1K Genomes Project (Poznik et al. 2016)
HG04235	HG04235	SouthAsia	ITU	India	H1a1a4b2b	Z5878		1K Genomes Project (Poznik et al. 2016)
HG04238	HG04238	SouthAsia	ITU	India	H3a1	Z13196		1K Genomes Project (Poznik et al. 2016)
HGDP00456_meyer2012	HGDP00456_meyer2012	Africa	MbutiPygmy	Congo	E1b1a1a1a1c1a1a	P252		HGDP (Meyer et al. 2012)
HGDP00521_meyer2012	HGDP00521_meyer2012	Europe	French	France	I1	M253		HGDP (Meyer et al. 2012)
HGDP00665_meyer2012	HGDP00665_meyer2012	Europe	Sardinian	Italy	I2a1a1a1a1a1a1	PF4189		HGDP (Meyer et al. 2012)
HGDP00778_meyer2012	HGDP00778_meyer2012	EastAsia	Han	China	O2a2b1a1a1	F8		HGDP (Bergstrom et al. 2020)
HGDP00927_meyer2012	HGDP00927_meyer2012	Africa	Yoruba	Nigeria	E1b1a1a1a1c1a1a	P252		HGDP (Meyer et al. 2012)
HGDP00998_meyer2012	HGDP00998_meyer2012	America	Karitiana	Brazil	Q1b1a1a	M3		HGDP (Meyer et al. 2012)
HGDP01284_meyer2012	HGDP01284_meyer2012	Africa	Mandenka	Senegal	E1a1a2	Z17467	y	HGDP (Meyer et al. 2012)
HGDP01307_meyer2012	HGDP01307_meyer2012	EastAsia	Dai	China	O1b1a2b1a	F1127	y	HGDP (Meyer et al. 2012)
JAR-27	JAR-27	SouthEastAsia	Andamanese	AndamanIslands	D1	CTS94	y	Mondal et al. 2017
JAR-54	JAR-54	SouthEastAsia	Andamanese	AndamanIslands	D1	CTS94	y	Mondal et al. 2017
JAR-61	JAR-61	SouthEastAsia	Andamanese	AndamanIslands	D1	CTS94	y	Mondal et al. 2017
LP6005441-DNA_A01	HGDP01402	NorthAsia	Adygei	Russia-Caucasus	R1a1a1b1a1a1c	CTS11962.1		HGDP (Bergstrom et al. 2020)
LP6005441-DNA_A05	HGDP00530	Europe	French	France	J2a1a1a2b2a1a	M92		HGDP (Bergstrom et al. 2020)
LP6005441-DNA_A06	HGDP01153	Europe	Italian	Italy-Bergamo	I2a1b2a	L39		HGDP (Bergstrom et al. 2020)
LP6005441-DNA_A08	HGDP00449	Africa	MbutiPygmy	Congo	B2b1	M192	y	HGDP (Bergstrom et al. 2020)
LP6005441-DNA_A11	HGDP01032	Africa	San	Namibia	B2b1b1a	P6	y	HGDP (Bergstrom et al. 2020)
LP6005441-DNA_B11	HGDP00987	Africa	San	Namibia	A1b1a1a2a1a	P262	y	HGDP (Bergstrom et al. 2020)
LP6005441-DNA_C01	HGDP00058	SouthAsia	Balochi	Pakistan	L1a2	M357		HGDP (Bergstrom et al. 2020)
LP6005441-DNA_C02	HGDP01364	Europe	Basque	France	R1b1a1b1a1a2a1a1a1a	Z214		HGDP (Bergstrom et al. 2020)
LP6005441-DNA_C03	HGDP00019	SouthAsia	Brahui	Pakistan	O2a1b1a1a1a1e	M5420	y	HGDP (Bergstrom et al. 2020)
LP6005441-DNA_C05	HGDP00785	EastAsia	Han	China	O1a1a1a1a1a1	CTS2498		HGDP (Bergstrom et al. 2020)
LP6005441-DNA_C06	HGDP00749	EastAsia	Japanese	Japan	O2a2b1a1a1	F8		HGDP (Bergstrom et al. 2020)
LP6005441-DNA_C07	HGDP00160	SouthAsia	Makrani	Pakistan	J2a1a4b	L25	y	HGDP (Bergstrom et al. 2020)
LP6005441-DNA_C08	HGDP01191	EastAsia	Miao	China	O1b1a1a1a1a1a	CTS10965		HGDP (Bergstrom et al. 2020)
LP6005441-DNA_C09	HGDP00798	Europe	Orcadian	OrkneyIslands	R1b1a1b1a1a1b1a1a	S5741		HGDP (Bergstrom et al. 2020)
LP6005441-DNA_C10	HGDP00216	SouthAsia	Pathan	Pakistan	R1a1a1b2a1a2c	Y7		HGDP (Bergstrom et al. 2020)
LP6005441-DNA_C11	HGDP01079	Europe	Sardinian	Italy	J1a2a1a2	P58	y	HGDP (Bergstrom et al. 2020)
LP6005441-DNA_D01	HGDP00090	SouthAsia	Balochi	Pakistan	E1b1b1a1b2	L677		HGDP (Bergstrom et al. 2020)
LP6005441-DNA_D03	HGDP00027	SouthAsia	Brahui	Pakistan	R1a1a1b2a1a1a	Y6		HGDP (Bergstrom et al. 2020)
LP6005441-DNA_E02	HGDP00616	Cent/WestAsia	Bedouin	Israel-Negev	J1a2a1a2	P58		HGDP (Bergstrom et al. 2020)
LP6005441-DNA_E03	HGDP00428	SouthAsia	Burusho	Pakistan	H1a1a4b	M2716		HGDP (Bergstrom et al. 2020)
LP6005441-DNA_E05	HGDP00125	SouthAsia	Hazara	Pakistan	C2b1a1a1b~	CTS4449	y	HGDP (Bergstrom et al. 2020)
LP6005441-DNA_E06	HGDP00328	SouthAsia	Kalash	Pakistan	H1a1a4b1	Z5873		HGDP (Bergstrom et al. 2020)
LP6005441-DNA_E07	HGDP01199	Africa	Mandenka	Senegal	E1b1a1a1a2a1	M4254		HGDP (Bergstrom et al. 2020)
LP6005441-DNA_E08	HGDP01228	EastAsia	Mongola	China	O2a2b1a2a1a	F46		HGDP (Bergstrom et al. 2020)
LP6005441-DNA_E09	HGDP01203	EastAsia	Oroqen	China	N1a1a	M178		HGDP (Bergstrom et al. 2020)
LP6005441-DNA_E10	HGDP01047	America	Pima	Mexico	Q1b1a1a	M3		HGDP (Bergstrom et al. 2020)
LP6005441-DNA_F01	HGDP01035	Africa	BantuSouthAfrica	BotswanaOrNamibia	E1b1a1a1a1a	M58		HGDP (Bergstrom et al. 2020)
LP6005441-DNA_F05	HGDP00124	SouthAsia	Hazara	Pakistan	O2a1b1a1a1a	F11		HGDP (Bergstrom et al. 2020)
LP6005441-DNA_G02	HGDP00457	Africa	BiakaPygmy	CentralAfricanRepublic	B2a1a1a1	M109	y	HGDP (Bergstrom et al. 2020)
LP6005441-DNA_G03	HGDP00717	SouthEastAsia	Cambodian	Cambodia	O1b1a1a1b1a1	FGC29907		HGDP (Bergstrom et al. 2020)
LP6005441-DNA_G04	HGDP00597	Cent/WestAsia	Druze	Israel-Carmel	J1a2a1a2	P58		HGDP (Bergstrom et al. 2020)
LP6005441-DNA_G05	HGDP01240	EastAsia	Hezhen	China	O1b2a1a2a1a	CTS7620		HGDP (Bergstrom et al. 2020)
LP6005441-DNA_G06	HGDP01012	America	Karitiana	Brazil	Q1b1a1a	M3		HGDP (Bergstrom et al. 2020)
LP6005441-DNA_G08	HGDP01253	Africa	Mozabite	Algeria-Mzab	E1b1b1b1a1	M183		HGDP (Bergstrom et al. 2020)
LP6005441-DNA_G10	HGDP00887	NorthAsia	Russian	Russia	I2a1a2b1a1a2	Y4460	y	HGDP (Bergstrom et al. 2020)
LP6005441-DNA_G11	HGDP00208	SouthAsia	Sindhi	Pakistan	R1a1a1b2a1a2c	Y7		HGDP (Bergstrom et al. 2020)
LP6005441-DNA_G12	HGDP01163	Europe	Tuscan	Italy	J2a1a1a2b2a1a	M92		HGDP (Bergstrom et al. 2020)
LP6005441-DNA_H02	HGDP00461	Africa	BiakaPygmy	CentralAfricanRepublic	B2b1a1b	M30	y	HGDP (Bergstrom et al. 2020)
LP6005442-DNA_A02	HGDP00932	Africa	Yoruba	Nigeria	E1b1a1a1a1c1b	M263.2		HGDP (Bergstrom et al. 2020)
LP6005442-DNA_A03	BulgarianB4	Europe	Bulgarian	Bulgaria	J2b2a1a1a1a1a	Z1297		SGDP (Mallick et al. 2016)
LP6005442-DNA_A04	mg31	Cent/WestAsia	Georgian	Georgia	J2a	M410		SGDP (Mallick et al. 2016)
LP6005442-DNA_A08	NA15202	Europe	Hungarian	Hungary	I1a2a1a1a	Z141		SGDP (Mallick et al. 2016)
LP6005442-DNA_A10	HG03100	Africa	Esan	Nigeria	E1b1a1a1a2a1	M4254		SGDP (Mallick et al. 2016)	in duplicate
LP6005442-DNA_A11	HG01503	Europe	Spanish	Spain	R1b1a1b1a1a2c1a4b2d1	DF73		SGDP (Mallick et al. 2016)
LP6005442-DNA_A12	HG02783	SouthAsia	Punjabi	Pakistan	R2	L266		SGDP (Mallick et al. 2016)
LP6005442-DNA_B03	BulgarianC1	Europe	Bulgarian	Bulgaria	E1b1b1a1b1a	V13		SGDP (Mallick et al. 2016)
LP6005442-DNA_B04	mg27	Cent/WestAsia	Georgian	Georgia	G2a1a1a1a1a	Z8014		SGDP (Mallick et al. 2016)
LP6005442-DNA_C02	abh107	Cent/WestAsia	Abkhasian	Abkhazia	G2a1a1	Z6653		SGDP (Mallick et al. 2016)
LP6005442-DNA_C04	iran17	Cent/WestAsia	Iranian	Iran	Q2a1a	Y2121		SGDP (Mallick et al. 2016)
LP6005442-DNA_C07	NA13607	EastAsia	Ami	Taiwan	O2a2a1a2a	M209	y	SGDP (Mallick et al. 2016)
LP6005442-DNA_C10	HG00190	Europe	Finnish	Finland	I1a1b1a4a2	L813		SGDP (Mallick et al. 2016)	in duplicate
LP6005442-DNA_C11	HG01846	SouthEastAsia	Kinh	Vietnam	O1b1a1a1a1a1a1a1a1	CTS2022		SGDP (Mallick et al. 2016)
LP6005442-DNA_D01	HGDP01250	EastAsia	Xibo	China	C2a1a2a1a1a	B89	y	HGDP (Bergstrom et al. 2020)
LP6005442-DNA_D02	abh100	NorthAsia	Abkhasian	Russia	J2a1a1a2b2	M67		SGDP (Mallick et al. 2016)
LP6005442-DNA_D03	ch113	NorthAsia	Chechen	Russia	J1a2b	CTS15		SGDP (Mallick et al. 2016)
LP6005442-DNA_E04	Jordan214	Cent/WestAsia	Jordanian	Jordan	T1a1a1b2b2b1a	P77		SGDP (Mallick et al. 2016)
LP6005442-DNA_E07	NA13604	EastAsia	Atayal	Taiwan	O1a1a1a	F140	y	SGDP (Mallick et al. 2016)
LP6005442-DNA_E10	HG00126	Europe	English	England	R1b1a1b1a1a2a1b1a1	M167		SGDP (Mallick et al. 2016)
LP6005442-DNA_E11	NA19044	Africa	Luhya	Kenya	E1b1a1a1a1c1a1a	P252		SGDP (Mallick et al. 2016)
LP6005442-DNA_F02	altai363p	NorthAsia	Altaian	Russia	R1a1a1b2	Z93		SGDP (Mallick et al. 2016)
LP6005442-DNA_F04	Jordan603	Cent/WestAsia	Jordanian	Jordan	J1a2a1a2	P58		SGDP (Mallick et al. 2016)
LP6005442-DNA_G01	HGDP01179	EastAsia	Yi	China	O1b1a1a1b1b	Z39485		HGDP (Bergstrom et al. 2020)
LP6005442-DNA_G02	armenia293	Cent/WestAsia	Armenian	Armenia	J2a1a4b	L25		SGDP (Mallick et al. 2016)
LP6005442-DNA_G03	Est400	Europe	Estonian	Estonia	N1a1a1a1a1a1a	L550		SGDP (Mallick et al. 2016)
LP6005442-DNA_G04	lez42	NorthAsia	Lezgin	Russia	R1b1a1b1b	CTS1078		SGDP (Mallick et al. 2016)
LP6005442-DNA_G07	NA17377	Europe	Greek	Greece	E1b1b1a1b1a	V13		SGDP (Mallick et al. 2016)
LP6005442-DNA_G10	HG02464	Africa	Gambian	Gambia	E1b1a1a1a1c2c	CTS3274		SGDP (Mallick et al. 2016)
LP6005442-DNA_G11	HG03078	Africa	Mende	SierraLeone	E1b1a1a1a1c2c	CTS3274		SGDP (Mallick et al. 2016)
LP6005442-DNA_H03	Est375	Europe	Estonian	Estonia	N1a1a1a1a1a	CTS2929		SGDP (Mallick et al. 2016)
LP6005442-DNA_H04	lez49	NorthAsia	Lezgin	Russia	R1b1a1b1b3a	CTS1843		SGDP (Mallick et al. 2016)
LP6005443-DNA_A01	HGDP01417	Africa	BantuKenya	Kenya	E2b1a1	M200		HGDP (Bergstrom et al. 2020)
LP6005443-DNA_A02	HGDP01095	EastAsia	Tujia	China	O1b1a1a1a1a1a1a2	Z24091		HGDP (Bergstrom et al. 2020)
LP6005443-DNA_A03	Ale22	NorthAsia	Aleut	Russia	J2a1a	L26	y	SGDP (Mallick et al. 2016)
LP6005443-DNA_A06	NA17374	Europe	Greek	Greece	G2a2b2a1	CTS12570		SGDP (Mallick et al. 2016)
LP6005443-DNA_A07	CHI-007	SouthEastAsia	Thai	Thailand	O2a2b1a2a1a	F46		SGDP (Mallick et al. 2016)
LP6005443-DNA_A12	zapo0098	America	Zapotec	Mexico	Q1b1a1a	M3		SGDP (Mallick et al. 2016)
LP6005443-DNA_B01	HGDP01312	EastAsia	Dai	China	O1b1a1a1b1b	Z39485		HGDP (Bergstrom et al. 2020)
LP6005443-DNA_B02	HGDP01297	EastAsia	Uygur	China	R1a1a1b2a1a2c	Y7		HGDP (Bergstrom et al. 2020)
LP6005443-DNA_B03	Sir26	NorthAsia	Eskimo_Sireniki	Russia	N1a1a1a1a	L392		SGDP (Mallick et al. 2016)
LP6005443-DNA_B09	DNK11	Africa	Dinka	Sudan	A1b1b2b1	M118	y	SGDP (Mallick et al. 2016)
LP6005443-DNA_B10	iran11	Cent/WestAsia	Iranian	Iran	E1b1b1a1b2	L677	y	SGDP (Mallick et al. 2016)
LP6005443-DNA_C02	HGDP01246	EastAsia	Xibo	China	O2a2b1a2a1a	F46		HGDP (Bergstrom et al. 2020)
LP6005443-DNA_C03	Sir19	NorthAsia	Chukchi	Russia	R1a1a1b1a2b3a1a1b1	L365		SGDP (Mallick et al. 2016)
LP6005443-DNA_C04	Nlk18	NorthAsia	Even	Russia	C2a1a2a1a1a	B89	y	SGDP (Mallick et al. 2016)
LP6005443-DNA_C09	Kusunda02	SouthAsia	Kusunda	Nepal	H1a2a	Z13966		SGDP (Mallick et al. 2016)
LP6005443-DNA_D02	HGDP00951	NorthAsia	Yakut	Siberia	N1a1a1a	L708		HGDP (Bergstrom et al. 2020)
LP6005443-DNA_D03	Esk29	NorthAsia	Eskimo_Chaplin	Russia	N1a1a1a1a	L392		SGDP (Mallick et al. 2016)
LP6005443-DNA_D06	ND19394	EastAsia	Korean	Korea	O2a2b1a2a1a	F46		SGDP (Mallick et al. 2016)
LP6005443-DNA_D09	Kusunda15	SouthAsia	Kusunda	Nepal	H1a2a	Z13966	y	SGDP (Mallick et al. 2016)
LP6005443-DNA_E01	HGDP01320	EastAsia	Lahu	China	F2b	M427	y	HGDP (Bergstrom et al. 2020)
LP6005443-DNA_E02	HGDP01028	Africa	BantuSouthAfrica	BotswanaOrNamibia	E1b1a1a1a1a	M58		HGDP (Bergstrom et al. 2020)
LP6005443-DNA_E05	Ale32	NorthAsia	Tlingit	Russia	N1a2b2a1c~	L665		SGDP (Mallick et al. 2016)
LP6005443-DNA_E06	NA21581	Africa	Masai	Kenya	E2a~	M41	y	SGDP (Mallick et al. 2016)
LP6005443-DNA_E09	HGDP01338	EastAsia	Naxi	China	O2a2b1a1a1	F8		HGDP (Bergstrom et al. 2020)
LP6005443-DNA_E10	NorthOssetia12	NorthAsia	North_Ossetian	Russia	J2a	M410	y	SGDP (Mallick et al. 2016)
LP6005443-DNA_F01	HGDP01333	EastAsia	She	China	O2a2a1a2a1a1a2a1a1	N5	y	HGDP (Bergstrom et al. 2020)
LP6005443-DNA_F02	HGDP01034	Africa	BantuSouthAfrica	BotswanaOrNamibia	E1b1a1a1a1c1a1a	P252		HGDP (Bergstrom et al. 2020)
LP6005443-DNA_F04	Mansi79	NorthAsia	Mansi	Russia	N1a2b2a1c~	L665	y	SGDP (Mallick et al. 2016)
LP6005443-DNA_F06	NA21490	Africa	Masai	Kenya	E1b1b1b2b2a1	M293		SGDP (Mallick et al. 2016)
LP6005443-DNA_F07	HGDP00548	Oceania	Papuan	NewGuinea	M1a3b1	Z33322	y	HGDP (Bergstrom et al. 2020)
LP6005443-DNA_F10	NorthOssetia5	NorthAsia	North_Ossetian	Russia	J2a1a1a2b2	M67		SGDP (Mallick et al. 2016)
LP6005443-DNA_G02	HGDP01030	Africa	BantuSouthAfrica	BotswanaOrNamibia	E1b1a1a1a1c	L485		HGDP (Bergstrom et al. 2020)
LP6005443-DNA_G05	NA13616	EastAsia	Ami	Taiwan	O2a2a1a2a	M209		SGDP (Mallick et al. 2016)
LP6005443-DNA_G08	HGDP00991	Africa	San	Namibia	B2b1b1a	P6	y	HGDP (Bergstrom et al. 2020)
LP6005443-DNA_G11	mixa0099	America	Mixtec	Mexico	Q1b1a1a	M3		SGDP (Mallick et al. 2016)
LP6005443-DNA_H01	HGDP01350	EastAsia	Tu	China	R1a1a1b2a2a1	Z2123	y	HGDP (Bergstrom et al. 2020)
LP6005443-DNA_H05	NA15728	Europe	Czech	Czechoslovia(pre1989)	J1a2a1a2c1a1	L816	y	SGDP (Mallick et al. 2016)
LP6005443-DNA_H07	HGDP00540	Oceania	Papuan	NewGuinea	S1a1b1d	Z41502	y	HGDP (Bergstrom et al. 2020)
LP6005443-DNA_H08	DNK05	Africa	Dinka	Sudan	E2a~	M41	y	SGDP (Mallick et al. 2016)
LP6005519-DNA_A04	K1	SouthAsia	Kapu	India	H1a1a4b3b1a	Z5890		SGDP (Mallick et al. 2016)
LP6005519-DNA_A05	R3	SouthAsia	Relli	India	R1a1a1b2a1a2c	Y7		SGDP (Mallick et al. 2016)
LP6005519-DNA_A06	Bu5	SouthEastAsia	Burmese	Myanmar	O2a2b1a1a1	F8		SGDP (Mallick et al. 2016)
LP6005519-DNA_B04	K4	SouthAsia	Kapu	India	L1a1	M27	y	SGDP (Mallick et al. 2016)
LP6005519-DNA_B05	R6	SouthAsia	Relli	India	H1a1a4a	Z14665	y	SGDP (Mallick et al. 2016)
LP6005519-DNA_B06	Bu16	SouthEastAsia	Burmese	Myanmar	O2a1b1a2a1a	F134		SGDP (Mallick et al. 2016)
LP6005519-DNA_C03	tdj409_shugnan	Cent/WestAsia	Tajik	Tajikistan	L1a2	M357	y	SGDP (Mallick et al. 2016)
LP6005519-DNA_C04	Y4	SouthAsia	Yadava	India	H1a2a	Apt		SGDP (Mallick et al. 2016)
LP6005519-DNA_C05	I1	SouthAsia	Irula	India	R2	L266		SGDP (Mallick et al. 2016)
LP6005519-DNA_D01	TGBS21	America	Chane	Argentina	Q1b1a1a	M3		SGDP (Mallick et al. 2016)
LP6005519-DNA_D03	tdj430_shugnan	Cent/WestAsia	Tajik	Tajikistan	L1a2	M357		SGDP (Mallick et al. 2016)
LP6005519-DNA_D04	Y8	SouthAsia	Yadava	India	H1a2a	Apt		SGDP (Mallick et al. 2016)
LP6005519-DNA_D05	I3	SouthAsia	Irula	India	L1a2	M357	y	SGDP (Mallick et al. 2016)
LP6005519-DNA_D06	Igor21	Oceania	Igorot	Philippines	O1a1a1a1	CTS3758		SGDP (Mallick et al. 2016)
LP6005519-DNA_E04	ML2	SouthAsia	Mala	India	R1a1a1b2a1a1a	Y6		SGDP (Mallick et al. 2016)
LP6005519-DNA_E05	KD4	SouthAsia	Khonda_Dora	India	O1b1a1a1b1a	B426		SGDP (Mallick et al. 2016)
LP6005519-DNA_F03	Armenian222	Cent/WestAsia	Armenian	Armenia	R1b1a1b1b	CTS1078		SGDP (Mallick et al. 2016)
LP6005519-DNA_F04	ML3	SouthAsia	Mala	India	H3b1	Z5859	y	SGDP (Mallick et al. 2016)
LP6005519-DNA_G03	B11	SouthAsia	Brahmin	India	R2	L266		SGDP (Mallick et al. 2016)
LP6005519-DNA_G04	M4	SouthAsia	Madiga	India	R2	L266		SGDP (Mallick et al. 2016)
LP6005519-DNA_H03	B17	SouthAsia	Brahmin	India	J2a2a1a1a2	P279	y	SGDP (Mallick et al. 2016)
LP6005519-DNA_H04	M13	SouthAsia	Madiga	India	J2b2a	M241	y	SGDP (Mallick et al. 2016)
LP6005592-DNA_A02	HG00360	Europe	Finnish	Finland	I2a1a2b1a1a2a	Y3118		SGDP (Mallick et al. 2016)
LP6005592-DNA_B02	NA17386	Oceania	Maori	NewZealand	I2a1b1a1a1b	L1193	y	SGDP (Mallick et al. 2016)
LP6005592-DNA_B03	HGDP00722	Cent/WestAsia	Palestinian	Israel-Central	E1b1b1a1b2a4c1~	L674		HGDP (Bergstrom et al. 2020)
LP6005592-DNA_B04	HG02724	SouthAsia	Punjabi	Pakistan	J2a1a	L26		SGDP (Mallick et al. 2016)
LP6005592-DNA_C02	NA18940	EastAsia	Japanese	Japan	D1a2a3a1a1a~	CTS9991	y	SGDP (Mallick et al. 2016)
LP6005592-DNA_C03	HGDP00474	Africa	MbutiPygmy	Congo	E1b1a1a1a2a1	M4254		HGDP (Bergstrom et al. 2020)
LP6005592-DNA_D01	Utsa22	Europe	Saami	Finland	N1a1a1a1a2a1a1a	CTS1737		SGDP (Mallick et al. 2016)
LP6005592-DNA_D04	Sam02	Cent/WestAsia	Samaritan	Israel	J2a1a1a2b2	M67	y	SGDP (Mallick et al. 2016)
LP6005592-DNA_E01	IraqiJew4291	Cent/WestAsia	Iraqi_Jew	Iraq	J1a2a1a2	P58		SGDP (Mallick et al. 2016)
LP6005592-DNA_E02	ND15865	Europe	Polish	Poland	R1b1a1b1b3a1a1b	BY250		SGDP (Mallick et al. 2016)
LP6005592-DNA_G01	YemeniteJew5433	Cent/WestAsia	Yemenite_Jew	Yemen	T1a1a1b2b	Z709	y	SGDP (Mallick et al. 2016)
LP6005592-DNA_G03	Jordan445	Cent/WestAsia	Jordanian	Jordan	J2a	M410	y	SGDP (Mallick et al. 2016)
LP6005592-DNA_H03	NA17385	Oceania	Hawaiian	USA	O1a2a	F3288		SGDP (Mallick et al. 2016)
LP6005619-DNA_B01	SAH31	Africa	Saharawi	WesternSahara(Morocco)	E1b1b1b1a1	M183		SGDP (Mallick et al. 2016)
LP6005619-DNA_C01	SAH41	Africa	Saharawi	WesternSahara(Morocco)	E1b1a1a1	M180	y	SGDP (Mallick et al. 2016)
LP6005677-DNA_B02	Bishkek28440	Cent/WestAsia	Kyrgyz	Kyrgyzystan	R1a1a1b2	Z93		SGDP (Mallick et al. 2016)
LP6005677-DNA_C03	Kayseri23827	Cent/WestAsia	Turkish	Turkey	R1b1a1b1a1a2c1a5c	S5488		SGDP (Mallick et al. 2016)
LP6005677-DNA_D01	zapo0099	America	Zapotec	Mexico	Q1b1a1a	M3		SGDP (Mallick et al. 2016)
LP6005677-DNA_E01	NA11200	America	Quechua	Peru	Q1b1a1a	M3		SGDP (Mallick et al. 2016)
LP6005677-DNA_G01	Ayodo_430C	Africa	Luo	Kenya	E1b1b1a1a1b	V32	y	SGDP (Mallick et al. 2016)
LP6007068-DNA_A01	TZ-11	Europe	Crete	Greece	R1b1a1b1a1a2a1b1	Z292		SGDP (Mallick et al. 2016)
NA07029	NA07029	Europe	CEU	Europe	I1a2a1a	Z62		Polaris
NA07357	NA07357	Europe	CEU	Europe	R1b1a1b1a1a2	P312		Polaris
NA10851	NA10851	Europe	CEU	Europe	R1b1a1b1a1a2c1a1d4	A874		Polaris
NA11839	NA11839	Europe	CEU	Europe	R1b1a1b1a1a2	P312		Polaris
NA12003	NA12003	Europe	CEU	Europe	I2a1b1a2b1a2a1a1a1a1a1b	PH3769		Polaris
NA18509	NA18509	Africa	YRI	Nigeria	E1b1a1a1a1c1a1	M191		Polaris
NA18519	NA18519	Africa	YRI	Nigeria	E1b1a1a1a1c1a1a	P252		Polaris
NA18524	NA18524	EastAsia	CHS	China	J1a2a1a2	P58		Polaris
NA18544	NA18544	EastAsia	CHS	China	O2a1b2	SK1673	y	Polaris
NA18868	NA18868	Africa	YRI	Nigeria	E1b1a1a1a1c1a1	M191		Polaris
NA18952	NA18952	EastAsia	JPT	Japan	D1a2a3a3a2~	CTS5894	y	Polaris
NA18959	NA18959	EastAsia	JPT	Japan	O2a2b1a2a1a	F46		Polaris
NA18966	NA18966	EastAsia	JPT	Japan	D1a2a1c1b~	CTS3915	y	Polaris
NA18971	NA18971	EastAsia	JPT	Japan	C1a1a1b2	Z40544		1K Genomes Project (Poznik et al. 2016)
NA18974	NA18974	EastAsia	JPT	Japan	C1a1a1b1~	Z31834		1K Genomes Project (Poznik et al. 2016)
NA18989	NA18989	EastAsia	JPT	Japan	C1a1a1a1a~	CTS7675		1K Genomes Project (Poznik et al. 2016)
NA19006	NA19006	EastAsia	JPT	Japan	C1a1a1a1b~	Z7163		1K Genomes Project (Poznik et al. 2016)
NA19007	NA19007	EastAsia	JPT	Japan	O1b2a1a2a1a	CTS7620		Polaris
NA19174	NA19174	Africa	YRI	Nigeria	E1b1a1a1a1c1a1a	P252		Polaris
NA19178	NA19178	Africa	YRI	Nigeria	E1b1a1a1a1c1b	M263.2		Polaris
NA19207	NA19207	Africa	YRI	Nigeria	E1b1a1a1a1c1a1a	P252		Polaris
NA19213	NA19213	Africa	YRI	Nigeria	E1b1a1a1a1c1a1a	P252		Polaris
NA19239	NA19239	Africa	YRI	Nigeria	E1a2a1a1a	CTS1792		Polaris
NA19789	NA19789	America	MXL	Mexico	R1b1a1b1a1a2c1a1e	Z251		Polaris
NA19908	NA19908	Africa	ASW	Africa	E1b1a1a1a1c1a1a	P252		Polaris
NA19920	NA19920	Africa	ASW	Africa	E1b1a1a1a1c1a1a	P252		Polaris
NA20509	NA20509	Europe	TSI	Italy	R1b1a1b1a1a2b3c	Z145		Polaris
NA20863	NA20863	SouthAsia	GIH	India	H1a1a4b3b1a	Z5890		1K Genomes Project (Poznik et al. 2016)
NA21093	NA21093	SouthAsia	GIH	India	H1a1b1a	Z4417		1K Genomes Project (Poznik et al. 2016)
NA21111	NA21111	SouthAsia	GIH	India	H1a1b1a1	Z4540		1K Genomes Project (Poznik et al. 2016)
NA21112	NA21112	SouthAsia	GIH	India	H1a1b1a1	Z4540		1K Genomes Project (Poznik et al. 2016)
NA21116	NA21116	SouthAsia	GIH	India	H1a1a4b3b	Z5888		1K Genomes Project (Poznik et al. 2016)
NA21126	NA21126	SouthAsia	GIH	India	H1a1a4b3a1	Z5887		1K Genomes Project (Poznik et al. 2016)
NA21133	NA21133	SouthAsia	GIH	India	C1b1a1a2~	Z39946		1K Genomes Project (Poznik et al. 2016)
NA21781	NA21781	Europe	Caucasian	Europe	E1b1b1b2a1a4	L791	y	Polaris
ONG-4	ONG-4	SouthEastAsia	Andamanese	AndamanIslands	D1	CTS94	y	Mondal et al. 2017
ONG-9	ONG-9	SouthEastAsia	Andamanese	AndamanIslands	D1	CTS94	y	Mondal et al. 2017
SS6004467	HGDP01308	EastAsia	Dai	China	C2b2	CTS4660^	y	HGDP (Bergstrom et al. 2020)
SS6004468	HGDP00533	Europe	French	France	R1b1a1b1a1a1d2	Z27230		HGDP (Bergstrom et al. 2020)
SS6004469	HGDP00775	EastAsia	Han	China	O1b1a1b	F838		HGDP (Bergstrom et al. 2020)
SS6004470	HGDP01286	Africa	Mandenka	Senegal	E1b1b1a1a1c	CTS693	y	HGDP (Bergstrom et al. 2020)
SS6004471	HGDP00982	Africa	MbutiPygmy	Congo	E2b1a1	M200		HGDP (Bergstrom et al. 2020)
SS6004473	HGDP01036	Africa	San	Namibia	A1b1b2a	M51	y	HGDP (Bergstrom et al. 2020)
SS6004474	HGDP01076	Europe	Sardinian	Italy	J1a2a1a2	P58		HGDP (Bergstrom et al. 2020)
SS6004475	HGDP00936	Africa	Yoruba	Nigeria	E1b1a1a1a1c1a1a	P252		HGDP (Bergstrom et al. 2020)
SS6004476	HGDP01015	America	Karitiana	Brazil	Q1b1a1a	M3		HGDP (Bergstrom et al. 2020)
SS6004477	IHW9193	Oceania	Australian	Australia	C1b3b1	M210	y	SGDP (Mallick et al. 2016)
SS6004480	DNK07	Africa	Dinka	Sudan	A1b1b2b1	M118	y	SGDP (Mallick et al. 2016)
SSM072	SSM072	SouthEastAsia	Malays	Singapore	F2a	M89	y	Wong et al. 2013
yhg-de7119651	Nigerian-1	Africa	Nigerian	Nigeria	D0	BY205007	y	Haber et al. 2019
yhg-de7119652	Nigerian-2	Africa	Nigerian	Nigeria	D0	BY205007	y	Haber et al. 2019
yhg-de7119653	Nigerian-3	Africa	Nigerian	Nigeria	D0	BY205007	y	Haber et al. 2019

## Sheet: Suppl3
Supplementary table 3. Age estimates of Y chromosome clades reported in Figure 1
Lineage	rho TMRCA KYA (95% CI)	BEAST TMRCA KYA (95% HPD interval)
root	182.7 (161.5-207.3)	179.5 (156.6-206.2)
AT	146.7 (129.7-166.4)	146.9 (128.1-167.8)
BT	104.2 (92-118.2)	103 (90.1-118.4)
CT	76.2 (67.3-86.4)	76.3 (66.1-87.8)
CF	75 (66.3-85.1)	75.7 (65.7-87.1)
DE	73.4 (64.9-83.3)	72.4 (63.3-82.9)
FT	53.5 (47.3-60.7)	55.8 (48.8-64.1)
GHIJK	53.8 (47.5-61)	55.3 (48.3-63.3)
HIJK	54.4 (48.1-61.7)	55 (47.9-62.8)
IJK	52.9 (46.8-60)	54.1 (47.2-61.8)
K	50.8 (44.9-57.6)	52 (45.5-59.6)
NR	48.7 (43-56.4)	51.8 (45.3-59.2)
MR	48.9 (43.2-55.4)	51.4 (45-58.9)
P	50.4 (44.5-57.1)	51 (44.6-58.5)
MS	51.5 (45.5-58.4)	50.7 (44.4-58.2)
LT	49 (43.3-55.5)	48.7 (42.3-55.7)
NO	43.3 (38.2-49.1)	44.7 (39-51.3)
QR	35.4 (31.3-40.1)	36.9 (32.1-42.3)
B	97.8 (86.5-111)	99.5 (87-114.4)
E	60 (53-68.1)	58.5 (51-67.2)
D	68.8 (60.8-78)	71.2 (62.2-81.4)
D0	2 (1.8-2.3)	2 (1.4-2.7)
D1	53 (46.8-60.1)	52.3 (44.4-60.9)
D1a1	53.8 (47.5-61)	51.5 (43.9-60.2)
D1-D1a2	52.3 (46.2-59.4)	52 (44.4-60.8)
D1a1b	3.6 (3.1-4)	3.4 (2.6-4.4)
D1a1a	20.8 (18.4-23.6)	21.2 (17.8-25)
D1	4.7 (4.1-5.3)	4.9 (3.7-6.2)
D1a2	25.1 (22.1-28.4)	25.5 (21.8-29.8)
C	54.2 (47.9-61.5)	54.6 (47.7-62.8)
C1	50.7 (44.8-57.5)	53.4 (46.8-61.3)
C1b3	27.6 (24.4-31.3)	26.6 (22.9-30.9)
C1b3a	23.9 (21.2-27.2)	24.7 (21.1-28.8)
C1b3-C1b3a	48.5 (42.9-55)	48.9 (42.7-56.2)
C1b	52.7 (46.6-59.8)	52.6 (45.9-60.2)
C1b1	53.6 (47.3-60.8)	52.4 (45.7-60)
C1b1a	53.9 (47.7-61.2)	52 (45.3-59.5)
C1b1a2	52.9 (46.8-60)	51.8 (45.2-59.4)
C1b1a2a	0.9 (0.8-1)	0.9 (0.5-1.5)
C1b1a1	26.5 (23.4-30.1)	25.7 (21.9-30.1)
C2	39.1 (34.6-44.4)	38.1 (33-44.3)
F2a-F2b	50.5 (44.7-57.3)	51.8 (45.1-59.6)
F2b	1.4 (1.2-1.5)	1.6 (1.1-2.2)
G	30.7 (27.1-34.8)	31.1 (26.8-35.9)
G2	25.1 (22.2-28.5)	20.9 (17.9-24.2)
H	51.7 (45.7-58.6)	51.7 (45.1-59.2)
H2-H3	51.7 (45.7-58.6)	51.4 (44.8-59)
H-H1	47.3 (41.8-53.6)	47.4 (41.3-54.4)
H1	44.9 (39.6-50.9)	44 (38.2-50.5)
H1a2	39.7 (35.1-45)	38.8 (33.6-44.7)
H1a1	19 (16.8-21.6)	19 (16.1-22.2)
IJ	48.5 (42.9-55)	48.5 (42.2-55.6)
I	32 (28.3-36.3)	31.8 (27.5-36.6)
I1	5.6 (5-6.4)	5.1 (4-6.4)
I2	25.7 (22.7-29.2)	25.7 (22.2-29.7)
J	36 (31.9-40.9)	35.4 (30.7-40.7)
J1	21.1 (18.6-23.9)	20.7 (17.7-24.1)
J2	31.1 (27.5-35.2)	32.2 (28-37.1)
T	19.7 (17.4-22.3)	19.2 (16.2-22.5)
L	21.3 (18.8-24.1)	21.1 (18.2-24.5)
M	52.7 (46.5-59.7)	49.4 (43.1-56.5)
M1	15.1 (13.3-17.1)	14.9 (12.7-17.5)
S2	1.4 (1.2-1.5)	1.3 (0.8-2)
S	51.1 (45.2-58)	50.4 (44.1-57.7)
S1	50.3 (44.4-57)	50.2 (43.8-57.4)
S1d-S1a/b	52.3 (46.2-59.4)	50 (43.7-57.1)
S1a-S1b	50.9 (45-57.7)	49.9 (43.6-57)
S1a1-S1a3	50.5 (44.6-57.3)	48.1 (42-55.1)
S1a1a-S1a1b	46 (40.7-52.2)	46 (40.2-52.8)
S1a1b	14.9 (13.2-16.9)	14.9 (12.4-17.7)
S1a1a1-S1a1a2	27.3 (24.1-31)	27.2 (23.3-31.6)
S1a3	20.6 (18.2-23.4)	19.2 (16.2-22.5)
Q	33.4 (29.5-37.9)	34 (29.6-39.1)
Q1	29.7 (26.3-33.7)	30 (26-34.5)
Q2	16.8 (14.9-19.1)	16.6 (13.9-19.6)
R	31.1 (27.4-35.2)	31.1 (26.9-35.8)
R2	18.4 (16.2-20.8)	17.3 (14.7-20.2)
R1	24.2 (21.4-27.4)	25 (21.5-28.9)
R1b	20.4 (18.1-23.2)	22.1 (18.9-25.5)
R1a	5.7 (5.1-6.5)	5.1 (4.2-6.2)
N	20.2 (17.8-22.9)	20.6 (17.6-23.8)
O	36.6 (32.4-41.5)	36.7 (31.9-42)
O1	35.1 (31-39.8)	35.7 (31.1-40.9)
O2	34.7 (30.7-39.4)	33 (28.7-37.9)

## Sheet: Suppl4
Supplementary table 4. Additional samples included for Y lineage distributions
Sample	Population	Pop_long/Country/Region	Geographic region used	High-level hg used in current study	Reference
HG01890	ACB	African Caribbeans in Barbados	Africa	A	1K Genomes Project (Poznik et al. 2016)
HG02588	GWD	Gambian in Western Divisions in the Gambia	Africa	B	1K Genomes Project (Poznik et al. 2016)
HG03225	MSL	Mende in Sierra Leone	Africa	B	1K Genomes Project (Poznik et al. 2016)
HG03376	MSL	Mende in Sierra Leone	Africa	B	1K Genomes Project (Poznik et al. 2016)
NA19043	LWK	Luhya in Webuye, Kenya	Africa	B	1K Genomes Project (Poznik et al. 2016)
NA19454	LWK	Luhya in Webuye, Kenya	Africa	B	1K Genomes Project (Poznik et al. 2016)
NA19384	LWK	Luhya in Webuye, Kenya	Africa	B	1K Genomes Project (Poznik et al. 2016)
HG02810	GWD	Gambian in Western Divisions in the Gambia	Africa	E1a	1K Genomes Project (Poznik et al. 2016)
HG03024	GWD	Gambian in Western Divisions in the Gambia	Africa	E1a	1K Genomes Project (Poznik et al. 2016)
HG03027	GWD	Gambian in Western Divisions in the Gambia	Africa	E1a	1K Genomes Project (Poznik et al. 2016)
HG03048	GWD	Gambian in Western Divisions in the Gambia	Africa	E1a	1K Genomes Project (Poznik et al. 2016)
NA19189	YRI	Yoruba in Ibadan, Nigeria	Africa	E1a	1K Genomes Project (Poznik et al. 2016)
HG02461	GWD	Gambian in Western Divisions in the Gambia	Africa	E1a	1K Genomes Project (Poznik et al. 2016)
HG02570	GWD	Gambian in Western Divisions in the Gambia	Africa	E1a	1K Genomes Project (Poznik et al. 2016)
HG02623	GWD	Gambian in Western Divisions in the Gambia	Africa	E1a	1K Genomes Project (Poznik et al. 2016)
HG02634	GWD	Gambian in Western Divisions in the Gambia	Africa	E1a	1K Genomes Project (Poznik et al. 2016)
HG02819	GWD	Gambian in Western Divisions in the Gambia	Africa	E1a	1K Genomes Project (Poznik et al. 2016)
HG03258	GWD	Gambian in Western Divisions in the Gambia	Africa	E1a	1K Genomes Project (Poznik et al. 2016)
HG03439	MSL	Mende in Sierra Leone	Africa	E1a	1K Genomes Project (Poznik et al. 2016)
HG01882	ACB	African Caribbeans in Barbados	Africa	E1a	1K Genomes Project (Poznik et al. 2016)
HG02449	ACB	African Caribbeans in Barbados	Africa	E1a	1K Genomes Project (Poznik et al. 2016)
NA18856	YRI	Yoruba in Ibadan, Nigeria	Africa	E1a	1K Genomes Project (Poznik et al. 2016)
NA18910	YRI	Yoruba in Ibadan, Nigeria	Africa	E1a	1K Genomes Project (Poznik et al. 2016)
HG02628	GWD	Gambian in Western Divisions in the Gambia	Africa	E1b	1K Genomes Project (Poznik et al. 2016)
HG03054	MSL	Mende in Sierra Leone	Africa	E1b	1K Genomes Project (Poznik et al. 2016)
HG03057	MSL	Mende in Sierra Leone	Africa	E1b	1K Genomes Project (Poznik et al. 2016)
HG03066	MSL	Mende in Sierra Leone	Africa	E1b	1K Genomes Project (Poznik et al. 2016)
HG03385	MSL	Mende in Sierra Leone	Africa	E1b	1K Genomes Project (Poznik et al. 2016)
HG03391	MSL	Mende in Sierra Leone	Africa	E1b	1K Genomes Project (Poznik et al. 2016)
HG03397	MSL	Mende in Sierra Leone	Africa	E1b	1K Genomes Project (Poznik et al. 2016)
HG03436	MSL	Mende in Sierra Leone	Africa	E1b	1K Genomes Project (Poznik et al. 2016)
HG03442	MSL	Mende in Sierra Leone	Africa	E1b	1K Genomes Project (Poznik et al. 2016)
HG03457	MSL	Mende in Sierra Leone	Africa	E1b	1K Genomes Project (Poznik et al. 2016)
HG03460	MSL	Mende in Sierra Leone	Africa	E1b	1K Genomes Project (Poznik et al. 2016)
NA19900	ASW	African ancestry in Southwest USA	Africa	E1b	1K Genomes Project (Poznik et al. 2016)
HG02675	GWD	Gambian in Western Divisions in the Gambia	Africa	E1b	1K Genomes Project (Poznik et al. 2016)
HG02756	GWD	Gambian in Western Divisions in the Gambia	Africa	E1b	1K Genomes Project (Poznik et al. 2016)
HG02804	GWD	Gambian in Western Divisions in the Gambia	Africa	E1b	1K Genomes Project (Poznik et al. 2016)
HG02107	ACB	African Caribbeans in Barbados	Africa	E1b	1K Genomes Project (Poznik et al. 2016)
HG02496	ACB	African Caribbeans in Barbados	Africa	E1b	1K Genomes Project (Poznik et al. 2016)
NA20126	ASW	African ancestry in Southwest USA	Africa	E1b	1K Genomes Project (Poznik et al. 2016)
NA19429	LWK	Luhya in Webuye, Kenya	Africa	E1b	1K Genomes Project (Poznik et al. 2016)
HG02573	GWD	Gambian in Western Divisions in the Gambia	Africa	E1b	1K Genomes Project (Poznik et al. 2016)
HG02582	GWD	Gambian in Western Divisions in the Gambia	Africa	E1b	1K Genomes Project (Poznik et al. 2016)
HG02585	GWD	Gambian in Western Divisions in the Gambia	Africa	E1b	1K Genomes Project (Poznik et al. 2016)
HG02642	GWD	Gambian in Western Divisions in the Gambia	Africa	E1b	1K Genomes Project (Poznik et al. 2016)
HG02678	GWD	Gambian in Western Divisions in the Gambia	Africa	E1b	1K Genomes Project (Poznik et al. 2016)
HG02702	GWD	Gambian in Western Divisions in the Gambia	Africa	E1b	1K Genomes Project (Poznik et al. 2016)
HG02715	GWD	Gambian in Western Divisions in the Gambia	Africa	E1b	1K Genomes Project (Poznik et al. 2016)
HG02759	GWD	Gambian in Western Divisions in the Gambia	Africa	E1b	1K Genomes Project (Poznik et al. 2016)
HG02813	GWD	Gambian in Western Divisions in the Gambia	Africa	E1b	1K Genomes Project (Poznik et al. 2016)
HG02816	GWD	Gambian in Western Divisions in the Gambia	Africa	E1b	1K Genomes Project (Poznik et al. 2016)
HG02836	GWD	Gambian in Western Divisions in the Gambia	Africa	E1b	1K Genomes Project (Poznik et al. 2016)
HG02860	GWD	Gambian in Western Divisions in the Gambia	Africa	E1b	1K Genomes Project (Poznik et al. 2016)
HG02878	GWD	Gambian in Western Divisions in the Gambia	Africa	E1b	1K Genomes Project (Poznik et al. 2016)
HG02887	GWD	Gambian in Western Divisions in the Gambia	Africa	E1b	1K Genomes Project (Poznik et al. 2016)
HG02890	GWD	Gambian in Western Divisions in the Gambia	Africa	E1b	1K Genomes Project (Poznik et al. 2016)
HG03045	GWD	Gambian in Western Divisions in the Gambia	Africa	E1b	1K Genomes Project (Poznik et al. 2016)
HG03538	GWD	Gambian in Western Divisions in the Gambia	Africa	E1b	1K Genomes Project (Poznik et al. 2016)
HG03084	MSL	Mende in Sierra Leone	Africa	E1b	1K Genomes Project (Poznik et al. 2016)
HG03432	MSL	Mende in Sierra Leone	Africa	E1b	1K Genomes Project (Poznik et al. 2016)
HG03433	MSL	Mende in Sierra Leone	Africa	E1b	1K Genomes Project (Poznik et al. 2016)
HG03469	MSL	Mende in Sierra Leone	Africa	E1b	1K Genomes Project (Poznik et al. 2016)
HG03547	MSL	Mende in Sierra Leone	Africa	E1b	1K Genomes Project (Poznik et al. 2016)
HG03559	MSL	Mende in Sierra Leone	Africa	E1b	1K Genomes Project (Poznik et al. 2016)
HG02013	ACB	African Caribbeans in Barbados	Africa	E1b	1K Genomes Project (Poznik et al. 2016)
HG02255	ACB	African Caribbeans in Barbados	Africa	E1b	1K Genomes Project (Poznik et al. 2016)
HG03193	ESN	Esan in Nigeria	Africa	E1b	1K Genomes Project (Poznik et al. 2016)
NA19350	LWK	Luhya in Webuye, Kenya	Africa	E1b	1K Genomes Project (Poznik et al. 2016)
HG03565	MSL	Mende in Sierra Leone	Africa	E1b	1K Genomes Project (Poznik et al. 2016)
NA19121	YRI	Yoruba in Ibadan, Nigeria	Africa	E1b	1K Genomes Project (Poznik et al. 2016)
HG01986	ACB	African Caribbeans in Barbados	Africa	E1b	1K Genomes Project (Poznik et al. 2016)
HG01990	ACB	African Caribbeans in Barbados	Africa	E1b	1K Genomes Project (Poznik et al. 2016)
HG02283	ACB	African Caribbeans in Barbados	Africa	E1b	1K Genomes Project (Poznik et al. 2016)
HG02284	ACB	African Caribbeans in Barbados	Africa	E1b	1K Genomes Project (Poznik et al. 2016)
HG02307	ACB	African Caribbeans in Barbados	Africa	E1b	1K Genomes Project (Poznik et al. 2016)
HG02323	ACB	African Caribbeans in Barbados	Africa	E1b	1K Genomes Project (Poznik et al. 2016)
HG02442	ACB	African Caribbeans in Barbados	Africa	E1b	1K Genomes Project (Poznik et al. 2016)
HG02481	ACB	African Caribbeans in Barbados	Africa	E1b	1K Genomes Project (Poznik et al. 2016)
HG02484	ACB	African Caribbeans in Barbados	Africa	E1b	1K Genomes Project (Poznik et al. 2016)
HG02489	ACB	African Caribbeans in Barbados	Africa	E1b	1K Genomes Project (Poznik et al. 2016)
NA19834	ASW	African ancestry in Southwest USA	Africa	E1b	1K Genomes Project (Poznik et al. 2016)
NA19904	ASW	African ancestry in Southwest USA	Africa	E1b	1K Genomes Project (Poznik et al. 2016)
NA20291	ASW	African ancestry in Southwest USA	Africa	E1b	1K Genomes Project (Poznik et al. 2016)
NA20298	ASW	African ancestry in Southwest USA	Africa	E1b	1K Genomes Project (Poznik et al. 2016)
HG02944	ESN	Esan in Nigeria	Africa	E1b	1K Genomes Project (Poznik et al. 2016)
HG02971	ESN	Esan in Nigeria	Africa	E1b	1K Genomes Project (Poznik et al. 2016)
HG02981	ESN	Esan in Nigeria	Africa	E1b	1K Genomes Project (Poznik et al. 2016)
HG03103	ESN	Esan in Nigeria	Africa	E1b	1K Genomes Project (Poznik et al. 2016)
HG03127	ESN	Esan in Nigeria	Africa	E1b	1K Genomes Project (Poznik et al. 2016)
HG03172	ESN	Esan in Nigeria	Africa	E1b	1K Genomes Project (Poznik et al. 2016)
HG03190	ESN	Esan in Nigeria	Africa	E1b	1K Genomes Project (Poznik et al. 2016)
HG03196	ESN	Esan in Nigeria	Africa	E1b	1K Genomes Project (Poznik et al. 2016)
HG03199	ESN	Esan in Nigeria	Africa	E1b	1K Genomes Project (Poznik et al. 2016)
HG03268	ESN	Esan in Nigeria	Africa	E1b	1K Genomes Project (Poznik et al. 2016)
HG03271	ESN	Esan in Nigeria	Africa	E1b	1K Genomes Project (Poznik et al. 2016)
HG03280	ESN	Esan in Nigeria	Africa	E1b	1K Genomes Project (Poznik et al. 2016)
HG03295	ESN	Esan in Nigeria	Africa	E1b	1K Genomes Project (Poznik et al. 2016)
HG03352	ESN	Esan in Nigeria	Africa	E1b	1K Genomes Project (Poznik et al. 2016)
HG03367	ESN	Esan in Nigeria	Africa	E1b	1K Genomes Project (Poznik et al. 2016)
HG03370	ESN	Esan in Nigeria	Africa	E1b	1K Genomes Project (Poznik et al. 2016)
HG03515	ESN	Esan in Nigeria	Africa	E1b	1K Genomes Project (Poznik et al. 2016)
HG03518	ESN	Esan in Nigeria	Africa	E1b	1K Genomes Project (Poznik et al. 2016)
NA19041	LWK	Luhya in Webuye, Kenya	Africa	E1b	1K Genomes Project (Poznik et al. 2016)
NA19455	LWK	Luhya in Webuye, Kenya	Africa	E1b	1K Genomes Project (Poznik et al. 2016)
HG03060	MSL	Mende in Sierra Leone	Africa	E1b	1K Genomes Project (Poznik et al. 2016)
HG03074	MSL	Mende in Sierra Leone	Africa	E1b	1K Genomes Project (Poznik et al. 2016)
HG03224	MSL	Mende in Sierra Leone	Africa	E1b	1K Genomes Project (Poznik et al. 2016)
HG03472	MSL	Mende in Sierra Leone	Africa	E1b	1K Genomes Project (Poznik et al. 2016)
NA18504	YRI	Yoruba in Ibadan, Nigeria	Africa	E1b	1K Genomes Project (Poznik et al. 2016)
NA18507	YRI	Yoruba in Ibadan, Nigeria	Africa	E1b	1K Genomes Project (Poznik et al. 2016)
NA18510	YRI	Yoruba in Ibadan, Nigeria	Africa	E1b	1K Genomes Project (Poznik et al. 2016)
NA18516	YRI	Yoruba in Ibadan, Nigeria	Africa	E1b	1K Genomes Project (Poznik et al. 2016)
NA18874	YRI	Yoruba in Ibadan, Nigeria	Africa	E1b	1K Genomes Project (Poznik et al. 2016)
NA18877	YRI	Yoruba in Ibadan, Nigeria	Africa	E1b	1K Genomes Project (Poznik et al. 2016)
NA18908	YRI	Yoruba in Ibadan, Nigeria	Africa	E1b	1K Genomes Project (Poznik et al. 2016)
NA18915	YRI	Yoruba in Ibadan, Nigeria	Africa	E1b	1K Genomes Project (Poznik et al. 2016)
NA19107	YRI	Yoruba in Ibadan, Nigeria	Africa	E1b	1K Genomes Project (Poznik et al. 2016)
NA19113	YRI	Yoruba in Ibadan, Nigeria	Africa	E1b	1K Genomes Project (Poznik et al. 2016)
NA19146	YRI	Yoruba in Ibadan, Nigeria	Africa	E1b	1K Genomes Project (Poznik et al. 2016)
NA19198	YRI	Yoruba in Ibadan, Nigeria	Africa	E1b	1K Genomes Project (Poznik et al. 2016)
NA19200	YRI	Yoruba in Ibadan, Nigeria	Africa	E1b	1K Genomes Project (Poznik et al. 2016)
NA19210	YRI	Yoruba in Ibadan, Nigeria	Africa	E1b	1K Genomes Project (Poznik et al. 2016)
NA19248	YRI	Yoruba in Ibadan, Nigeria	Africa	E1b	1K Genomes Project (Poznik et al. 2016)
NA20281	ASW	African ancestry in Southwest USA	Africa	E1b	1K Genomes Project (Poznik et al. 2016)
HG02947	ESN	Esan in Nigeria	Africa	E1b	1K Genomes Project (Poznik et al. 2016)
HG02977	ESN	Esan in Nigeria	Africa	E1b	1K Genomes Project (Poznik et al. 2016)
HG03109	ESN	Esan in Nigeria	Africa	E1b	1K Genomes Project (Poznik et al. 2016)
HG03139	ESN	Esan in Nigeria	Africa	E1b	1K Genomes Project (Poznik et al. 2016)
HG03160	ESN	Esan in Nigeria	Africa	E1b	1K Genomes Project (Poznik et al. 2016)
HG03175	ESN	Esan in Nigeria	Africa	E1b	1K Genomes Project (Poznik et al. 2016)
NA19026	LWK	Luhya in Webuye, Kenya	Africa	E1b	1K Genomes Project (Poznik et al. 2016)
NA19027	LWK	Luhya in Webuye, Kenya	Africa	E1b	1K Genomes Project (Poznik et al. 2016)
NA19028	LWK	Luhya in Webuye, Kenya	Africa	E1b	1K Genomes Project (Poznik et al. 2016)
NA19031	LWK	Luhya in Webuye, Kenya	Africa	E1b	1K Genomes Project (Poznik et al. 2016)
NA19307	LWK	Luhya in Webuye, Kenya	Africa	E1b	1K Genomes Project (Poznik et al. 2016)
NA19308	LWK	Luhya in Webuye, Kenya	Africa	E1b	1K Genomes Project (Poznik et al. 2016)
NA19312	LWK	Luhya in Webuye, Kenya	Africa	E1b	1K Genomes Project (Poznik et al. 2016)
NA19317	LWK	Luhya in Webuye, Kenya	Africa	E1b	1K Genomes Project (Poznik et al. 2016)
NA19318	LWK	Luhya in Webuye, Kenya	Africa	E1b	1K Genomes Project (Poznik et al. 2016)
NA19319	LWK	Luhya in Webuye, Kenya	Africa	E1b	1K Genomes Project (Poznik et al. 2016)
NA19347	LWK	Luhya in Webuye, Kenya	Africa	E1b	1K Genomes Project (Poznik et al. 2016)
NA19360	LWK	Luhya in Webuye, Kenya	Africa	E1b	1K Genomes Project (Poznik et al. 2016)
NA19372	LWK	Luhya in Webuye, Kenya	Africa	E1b	1K Genomes Project (Poznik et al. 2016)
NA19376	LWK	Luhya in Webuye, Kenya	Africa	E1b	1K Genomes Project (Poznik et al. 2016)
NA19383	LWK	Luhya in Webuye, Kenya	Africa	E1b	1K Genomes Project (Poznik et al. 2016)
NA19385	LWK	Luhya in Webuye, Kenya	Africa	E1b	1K Genomes Project (Poznik et al. 2016)
NA19393	LWK	Luhya in Webuye, Kenya	Africa	E1b	1K Genomes Project (Poznik et al. 2016)
NA19394	LWK	Luhya in Webuye, Kenya	Africa	E1b	1K Genomes Project (Poznik et al. 2016)
NA19428	LWK	Luhya in Webuye, Kenya	Africa	E1b	1K Genomes Project (Poznik et al. 2016)
NA19430	LWK	Luhya in Webuye, Kenya	Africa	E1b	1K Genomes Project (Poznik et al. 2016)
NA19443	LWK	Luhya in Webuye, Kenya	Africa	E1b	1K Genomes Project (Poznik et al. 2016)
NA19451	LWK	Luhya in Webuye, Kenya	Africa	E1b	1K Genomes Project (Poznik et al. 2016)
NA19452	LWK	Luhya in Webuye, Kenya	Africa	E1b	1K Genomes Project (Poznik et al. 2016)
NA19461	LWK	Luhya in Webuye, Kenya	Africa	E1b	1K Genomes Project (Poznik et al. 2016)
NA19466	LWK	Luhya in Webuye, Kenya	Africa	E1b	1K Genomes Project (Poznik et al. 2016)
NA18917	YRI	Yoruba in Ibadan, Nigeria	Africa	E1b	1K Genomes Project (Poznik et al. 2016)
NA19092	YRI	Yoruba in Ibadan, Nigeria	Africa	E1b	1K Genomes Project (Poznik et al. 2016)
NA19117	YRI	Yoruba in Ibadan, Nigeria	Africa	E1b	1K Genomes Project (Poznik et al. 2016)
NA19171	YRI	Yoruba in Ibadan, Nigeria	Africa	E1b	1K Genomes Project (Poznik et al. 2016)
NA19223	YRI	Yoruba in Ibadan, Nigeria	Africa	E1b	1K Genomes Project (Poznik et al. 2016)
HG03077	MSL	Mende in Sierra Leone	Africa	E1b	1K Genomes Project (Poznik et al. 2016)
HG02009	ACB	African Caribbeans in Barbados	Africa	E1b	1K Genomes Project (Poznik et al. 2016)
HG02334	ACB	African Caribbeans in Barbados	Africa	E1b	1K Genomes Project (Poznik et al. 2016)
HG02429	ACB	African Caribbeans in Barbados	Africa	E1b	1K Genomes Project (Poznik et al. 2016)
NA19916	ASW	African ancestry in Southwest USA	Africa	E1b	1K Genomes Project (Poznik et al. 2016)
NA20362	ASW	African ancestry in Southwest USA	Africa	E1b	1K Genomes Project (Poznik et al. 2016)
HG02854	GWD	Gambian in Western Divisions in the Gambia	Africa	E1b	1K Genomes Project (Poznik et al. 2016)
HG03382	MSL	Mende in Sierra Leone	Africa	E1b	1K Genomes Project (Poznik et al. 2016)
HG03388	MSL	Mende in Sierra Leone	Africa	E1b	1K Genomes Project (Poznik et al. 2016)
HG03556	MSL	Mende in Sierra Leone	Africa	E1b	1K Genomes Project (Poznik et al. 2016)
NA19098	YRI	Yoruba in Ibadan, Nigeria	Africa	E1b	1K Genomes Project (Poznik et al. 2016)
NA20346	ASW	African ancestry in Southwest USA	Africa	E1b	1K Genomes Project (Poznik et al. 2016)
HG02610	GWD	Gambian in Western Divisions in the Gambia	Africa	E1b	1K Genomes Project (Poznik et al. 2016)
HG02884	GWD	Gambian in Western Divisions in the Gambia	Africa	E1b	1K Genomes Project (Poznik et al. 2016)
HG02895	GWD	Gambian in Western Divisions in the Gambia	Africa	E1b	1K Genomes Project (Poznik et al. 2016)
HG03240	GWD	Gambian in Western Divisions in the Gambia	Africa	E1b	1K Genomes Project (Poznik et al. 2016)
HG03394	MSL	Mende in Sierra Leone	Africa	E1b	1K Genomes Project (Poznik et al. 2016)
HG01885	ACB	African Caribbeans in Barbados	Africa	E1b	1K Genomes Project (Poznik et al. 2016)
HG02143	ACB	African Caribbeans in Barbados	Africa	E1b	1K Genomes Project (Poznik et al. 2016)
HG02314	ACB	African Caribbeans in Barbados	Africa	E1b	1K Genomes Project (Poznik et al. 2016)
HG02439	ACB	African Caribbeans in Barbados	Africa	E1b	1K Genomes Project (Poznik et al. 2016)
HG02455	ACB	African Caribbeans in Barbados	Africa	E1b	1K Genomes Project (Poznik et al. 2016)
HG02541	ACB	African Caribbeans in Barbados	Africa	E1b	1K Genomes Project (Poznik et al. 2016)
HG02554	ACB	African Caribbeans in Barbados	Africa	E1b	1K Genomes Project (Poznik et al. 2016)
NA19711	ASW	African ancestry in Southwest USA	Africa	E1b	1K Genomes Project (Poznik et al. 2016)
HG02923	ESN	Esan in Nigeria	Africa	E1b	1K Genomes Project (Poznik et al. 2016)
HG02938	ESN	Esan in Nigeria	Africa	E1b	1K Genomes Project (Poznik et al. 2016)
HG02941	ESN	Esan in Nigeria	Africa	E1b	1K Genomes Project (Poznik et al. 2016)
HG02953	ESN	Esan in Nigeria	Africa	E1b	1K Genomes Project (Poznik et al. 2016)
HG02968	ESN	Esan in Nigeria	Africa	E1b	1K Genomes Project (Poznik et al. 2016)
HG03115	ESN	Esan in Nigeria	Africa	E1b	1K Genomes Project (Poznik et al. 2016)
HG03118	ESN	Esan in Nigeria	Africa	E1b	1K Genomes Project (Poznik et al. 2016)
HG03124	ESN	Esan in Nigeria	Africa	E1b	1K Genomes Project (Poznik et al. 2016)
HG03133	ESN	Esan in Nigeria	Africa	E1b	1K Genomes Project (Poznik et al. 2016)
HG03136	ESN	Esan in Nigeria	Africa	E1b	1K Genomes Project (Poznik et al. 2016)
HG03157	ESN	Esan in Nigeria	Africa	E1b	1K Genomes Project (Poznik et al. 2016)
HG03166	ESN	Esan in Nigeria	Africa	E1b	1K Genomes Project (Poznik et al. 2016)
HG03202	ESN	Esan in Nigeria	Africa	E1b	1K Genomes Project (Poznik et al. 2016)
HG03265	ESN	Esan in Nigeria	Africa	E1b	1K Genomes Project (Poznik et al. 2016)
HG03298	ESN	Esan in Nigeria	Africa	E1b	1K Genomes Project (Poznik et al. 2016)
HG03304	ESN	Esan in Nigeria	Africa	E1b	1K Genomes Project (Poznik et al. 2016)
HG03311	ESN	Esan in Nigeria	Africa	E1b	1K Genomes Project (Poznik et al. 2016)
HG03313	ESN	Esan in Nigeria	Africa	E1b	1K Genomes Project (Poznik et al. 2016)
HG03343	ESN	Esan in Nigeria	Africa	E1b	1K Genomes Project (Poznik et al. 2016)
HG02594	GWD	Gambian in Western Divisions in the Gambia	Africa	E1b	1K Genomes Project (Poznik et al. 2016)
HG02839	GWD	Gambian in Western Divisions in the Gambia	Africa	E1b	1K Genomes Project (Poznik et al. 2016)
HG02881	GWD	Gambian in Western Divisions in the Gambia	Africa	E1b	1K Genomes Project (Poznik et al. 2016)
NA19020	LWK	Luhya in Webuye, Kenya	Africa	E1b	1K Genomes Project (Poznik et al. 2016)
NA19025	LWK	Luhya in Webuye, Kenya	Africa	E1b	1K Genomes Project (Poznik et al. 2016)
NA19374	LWK	Luhya in Webuye, Kenya	Africa	E1b	1K Genomes Project (Poznik et al. 2016)
NA18498	YRI	Yoruba in Ibadan, Nigeria	Africa	E1b	1K Genomes Project (Poznik et al. 2016)
NA18501	YRI	Yoruba in Ibadan, Nigeria	Africa	E1b	1K Genomes Project (Poznik et al. 2016)
NA18879	YRI	Yoruba in Ibadan, Nigeria	Africa	E1b	1K Genomes Project (Poznik et al. 2016)
NA18923	YRI	Yoruba in Ibadan, Nigeria	Africa	E1b	1K Genomes Project (Poznik et al. 2016)
NA18934	YRI	Yoruba in Ibadan, Nigeria	Africa	E1b	1K Genomes Project (Poznik et al. 2016)
NA19141	YRI	Yoruba in Ibadan, Nigeria	Africa	E1b	1K Genomes Project (Poznik et al. 2016)
NA19144	YRI	Yoruba in Ibadan, Nigeria	Africa	E1b	1K Genomes Project (Poznik et al. 2016)
NA19236	YRI	Yoruba in Ibadan, Nigeria	Africa	E1b	1K Genomes Project (Poznik et al. 2016)
HG01912	ACB	African Caribbeans in Barbados	Africa	E1b	1K Genomes Project (Poznik et al. 2016)
HG01914	ACB	African Caribbeans in Barbados	Africa	E1b	1K Genomes Project (Poznik et al. 2016)
HG02053	ACB	African Caribbeans in Barbados	Africa	E1b	1K Genomes Project (Poznik et al. 2016)
HG02332	ACB	African Caribbeans in Barbados	Africa	E1b	1K Genomes Project (Poznik et al. 2016)
NA19700	ASW	African ancestry in Southwest USA	Africa	E1b	1K Genomes Project (Poznik et al. 2016)
HG03112	ESN	Esan in Nigeria	Africa	E1b	1K Genomes Project (Poznik et al. 2016)
HG03163	ESN	Esan in Nigeria	Africa	E1b	1K Genomes Project (Poznik et al. 2016)
HG03072	MSL	Mende in Sierra Leone	Africa	E1b	1K Genomes Project (Poznik et al. 2016)
HG03081	MSL	Mende in Sierra Leone	Africa	E1b	1K Genomes Project (Poznik et al. 2016)
HG03209	MSL	Mende in Sierra Leone	Africa	E1b	1K Genomes Project (Poznik et al. 2016)
HG03478	MSL	Mende in Sierra Leone	Africa	E1b	1K Genomes Project (Poznik et al. 2016)
HG03571	MSL	Mende in Sierra Leone	Africa	E1b	1K Genomes Project (Poznik et al. 2016)
NA18522	YRI	Yoruba in Ibadan, Nigeria	Africa	E1b	1K Genomes Project (Poznik et al. 2016)
NA18853	YRI	Yoruba in Ibadan, Nigeria	Africa	E1b	1K Genomes Project (Poznik et al. 2016)
NA18865	YRI	Yoruba in Ibadan, Nigeria	Africa	E1b	1K Genomes Project (Poznik et al. 2016)
NA18871	YRI	Yoruba in Ibadan, Nigeria	Africa	E1b	1K Genomes Project (Poznik et al. 2016)
NA19119	YRI	Yoruba in Ibadan, Nigeria	Africa	E1b	1K Genomes Project (Poznik et al. 2016)
NA19130	YRI	Yoruba in Ibadan, Nigeria	Africa	E1b	1K Genomes Project (Poznik et al. 2016)
NA19138	YRI	Yoruba in Ibadan, Nigeria	Africa	E1b	1K Genomes Project (Poznik et al. 2016)
NA19153	YRI	Yoruba in Ibadan, Nigeria	Africa	E1b	1K Genomes Project (Poznik et al. 2016)
NA19160	YRI	Yoruba in Ibadan, Nigeria	Africa	E1b	1K Genomes Project (Poznik et al. 2016)
NA19184	YRI	Yoruba in Ibadan, Nigeria	Africa	E1b	1K Genomes Project (Poznik et al. 2016)
NA19703	ASW	African ancestry in Southwest USA	Africa	E1b	1K Genomes Project (Poznik et al. 2016)
NA20340	ASW	African ancestry in Southwest USA	Africa	E1b	1K Genomes Project (Poznik et al. 2016)
HG02557	ACB	African Caribbeans in Barbados	Africa	E1b	1K Genomes Project (Poznik et al. 2016)
NA19346	LWK	Luhya in Webuye, Kenya	Africa	E1b	1K Genomes Project (Poznik et al. 2016)
NA19375	LWK	Luhya in Webuye, Kenya	Africa	E1b	1K Genomes Project (Poznik et al. 2016)
NA19397	LWK	Luhya in Webuye, Kenya	Africa	E1b	1K Genomes Project (Poznik et al. 2016)
NA19448	LWK	Luhya in Webuye, Kenya	Africa	E1b	1K Genomes Project (Poznik et al. 2016)
NA18486	YRI	Yoruba in Ibadan, Nigeria	Africa	E1b	1K Genomes Project (Poznik et al. 2016)
NA19096	YRI	Yoruba in Ibadan, Nigeria	Africa	E1b	1K Genomes Project (Poznik et al. 2016)
NA19256	YRI	Yoruba in Ibadan, Nigeria	Africa	E1b	1K Genomes Project (Poznik et al. 2016)
HG02807	GWD	Gambian in Western Divisions in the Gambia	Africa	E1b	1K Genomes Project (Poznik et al. 2016)
HG02330	ACB	African Caribbeans in Barbados	Africa	E1b	1K Genomes Project (Poznik et al. 2016)
NA19818	ASW	African ancestry in Southwest USA	Africa	E1b	1K Genomes Project (Poznik et al. 2016)
NA19309	LWK	Luhya in Webuye, Kenya	Africa	E1b	1K Genomes Project (Poznik et al. 2016)
HG02317	ACB	African Caribbeans in Barbados	Africa	E1b	1K Genomes Project (Poznik et al. 2016)
HG02798	GWD	Gambian in Western Divisions in the Gambia	Africa	E1b	1K Genomes Project (Poznik et al. 2016)
NA19311	LWK	Luhya in Webuye, Kenya	Africa	E1b	1K Genomes Project (Poznik et al. 2016)
NA19331	LWK	Luhya in Webuye, Kenya	Africa	E1b	1K Genomes Project (Poznik et al. 2016)
NA19334	LWK	Luhya in Webuye, Kenya	Africa	E1b	1K Genomes Project (Poznik et al. 2016)
NA20348	ASW	African ancestry in Southwest USA	Africa	E2	1K Genomes Project (Poznik et al. 2016)
NA19175	YRI	Yoruba in Ibadan, Nigeria	Africa	E2	1K Genomes Project (Poznik et al. 2016)
NA19035	LWK	Luhya in Webuye, Kenya	Africa	E2	1K Genomes Project (Poznik et al. 2016)
NA19380	LWK	Luhya in Webuye, Kenya	Africa	E2	1K Genomes Project (Poznik et al. 2016)
HG02445	ACB	African Caribbeans in Barbados	Africa	I1	1K Genomes Project (Poznik et al. 2016)
HG02420	ACB	African Caribbeans in Barbados	Africa	I1	1K Genomes Project (Poznik et al. 2016)
HG02433	ACB	African Caribbeans in Barbados	Africa	I1	1K Genomes Project (Poznik et al. 2016)
NA19982	ASW	African ancestry in Southwest USA	Africa	I1	1K Genomes Project (Poznik et al. 2016)
HG02470	ACB	African Caribbeans in Barbados	Africa	I2	1K Genomes Project (Poznik et al. 2016)
HG02536	ACB	African Caribbeans in Barbados	Africa	I2	1K Genomes Project (Poznik et al. 2016)
NA20351	ASW	African ancestry in Southwest USA	Africa	I2	1K Genomes Project (Poznik et al. 2016)
NA19984	ASW	African ancestry in Southwest USA	Africa	I2	1K Genomes Project (Poznik et al. 2016)
HG01988	ACB	African Caribbeans in Barbados	Africa	I2	1K Genomes Project (Poznik et al. 2016)
NA20356	ASW	African ancestry in Southwest USA	Africa	R1b	1K Genomes Project (Poznik et al. 2016)
HG02545	ACB	African Caribbeans in Barbados	Africa	R1b	1K Genomes Project (Poznik et al. 2016)
HG02281	ACB	African Caribbeans in Barbados	Africa	R1b	1K Genomes Project (Poznik et al. 2016)
NA19922	ASW	African ancestry in Southwest USA	Africa	R1b	1K Genomes Project (Poznik et al. 2016)
HG02343	ACB	African Caribbeans in Barbados	Africa	R1b	1K Genomes Project (Poznik et al. 2016)
HG01879	ACB	African Caribbeans in Barbados	Africa	R1b	1K Genomes Project (Poznik et al. 2016)
NA20342	ASW	African ancestry in Southwest USA	Africa	R1b	1K Genomes Project (Poznik et al. 2016)
HG02051	ACB	African Caribbeans in Barbados	Africa	R1b	1K Genomes Project (Poznik et al. 2016)
NA20278	ASW	African ancestry in Southwest USA	Africa	R1b	1K Genomes Project (Poznik et al. 2016)
HG02501	ACB	African Caribbeans in Barbados	Africa	R1b	1K Genomes Project (Poznik et al. 2016)
NA20318	ASW	African ancestry in Southwest USA	Africa	R1b	1K Genomes Project (Poznik et al. 2016)
HG02014	ACB	African Caribbeans in Barbados	Africa	R1b	1K Genomes Project (Poznik et al. 2016)
HG00553	PUR	Puerto Ricans from Puerto Rico	America	B	1K Genomes Project (Poznik et al. 2016)
HG01094	PUR	Puerto Ricans from Puerto Rico	America	E1a	1K Genomes Project (Poznik et al. 2016)
HG01187	PUR	Puerto Ricans from Puerto Rico	America	E1b	1K Genomes Project (Poznik et al. 2016)
NA19726	MXL	Mexican Ancestry from Los Angeles, USA	America	E1b	1K Genomes Project (Poznik et al. 2016)
HG01305	PUR	Puerto Ricans from Puerto Rico	America	E1b	1K Genomes Project (Poznik et al. 2016)
HG01556	CLM	Colombians from Medellin, Colombia	America	E1b	1K Genomes Project (Poznik et al. 2016)
HG01302	PUR	Puerto Ricans from Puerto Rico	America	E1b	1K Genomes Project (Poznik et al. 2016)
HG01485	CLM	Colombians from Medellin, Colombia	America	E1b	1K Genomes Project (Poznik et al. 2016)
HG01204	PUR	Puerto Ricans from Puerto Rico	America	E1b	1K Genomes Project (Poznik et al. 2016)
HG01362	CLM	Colombians from Medellin, Colombia	America	E1b	1K Genomes Project (Poznik et al. 2016)
HG01497	CLM	Colombians from Medellin, Colombia	America	E1b	1K Genomes Project (Poznik et al. 2016)
HG01970	PEL	Peruvians from Lima, Peru	America	E1b	1K Genomes Project (Poznik et al. 2016)
HG01054	PUR	Puerto Ricans from Puerto Rico	America	E1b	1K Genomes Project (Poznik et al. 2016)
HG01072	PUR	Puerto Ricans from Puerto Rico	America	E1b	1K Genomes Project (Poznik et al. 2016)
HG01107	PUR	Puerto Ricans from Puerto Rico	America	E1b	1K Genomes Project (Poznik et al. 2016)
HG01308	PUR	Puerto Ricans from Puerto Rico	America	E1b	1K Genomes Project (Poznik et al. 2016)
NA19780	MXL	Mexican Ancestry from Los Angeles, USA	America	E1b	1K Genomes Project (Poznik et al. 2016)
HG01200	PUR	Puerto Ricans from Puerto Rico	America	E1b	1K Genomes Project (Poznik et al. 2016)
HG01377	CLM	Colombians from Medellin, Colombia	America	E1b	1K Genomes Project (Poznik et al. 2016)
NA19676	MXL	Mexican Ancestry from Los Angeles, USA	America	E1b	1K Genomes Project (Poznik et al. 2016)
NA19759	MXL	Mexican Ancestry from Los Angeles, USA	America	E1b	1K Genomes Project (Poznik et al. 2016)
NA19792	MXL	Mexican Ancestry from Los Angeles, USA	America	E1b	1K Genomes Project (Poznik et al. 2016)
HG02150	PEL	Peruvians from Lima, Peru	America	E1b	1K Genomes Project (Poznik et al. 2016)
HG01088	PUR	Puerto Ricans from Puerto Rico	America	E1b	1K Genomes Project (Poznik et al. 2016)
HG01104	PUR	Puerto Ricans from Puerto Rico	America	E1b	1K Genomes Project (Poznik et al. 2016)
HG01161	PUR	Puerto Ricans from Puerto Rico	America	E1b	1K Genomes Project (Poznik et al. 2016)
HG01250	CLM	Colombians from Medellin, Colombia	America	E1b	1K Genomes Project (Poznik et al. 2016)
HG01110	PUR	Puerto Ricans from Puerto Rico	America	E1b	1K Genomes Project (Poznik et al. 2016)
HG01325	PUR	Puerto Ricans from Puerto Rico	America	E1b	1K Genomes Project (Poznik et al. 2016)
HG01112	CLM	Colombians from Medellin, Colombia	America	E1b	1K Genomes Project (Poznik et al. 2016)
HG01455	CLM	Colombians from Medellin, Colombia	America	E1b	1K Genomes Project (Poznik et al. 2016)
HG01311	PUR	Puerto Ricans from Puerto Rico	America	G2	1K Genomes Project (Poznik et al. 2016)
NA19747	MXL	Mexican Ancestry from Los Angeles, USA	America	G2	1K Genomes Project (Poznik et al. 2016)
HG01097	PUR	Puerto Ricans from Puerto Rico	America	G2	1K Genomes Project (Poznik et al. 2016)
NA19670	MXL	Mexican Ancestry from Los Angeles, USA	America	G2	1K Genomes Project (Poznik et al. 2016)
NA19723	MXL	Mexican Ancestry from Los Angeles, USA	America	I1	1K Genomes Project (Poznik et al. 2016)
HG02274	PEL	Peruvians from Lima, Peru	America	I1	1K Genomes Project (Poznik et al. 2016)
HG01167	PUR	Puerto Ricans from Puerto Rico	America	I2	1K Genomes Project (Poznik et al. 2016)
HG01344	CLM	Colombians from Medellin, Colombia	America	I2	1K Genomes Project (Poznik et al. 2016)
HG01101	PUR	Puerto Ricans from Puerto Rico	America	I2	1K Genomes Project (Poznik et al. 2016)
HG01197	PUR	Puerto Ricans from Puerto Rico	America	I2	1K Genomes Project (Poznik et al. 2016)
HG01253	CLM	Colombians from Medellin, Colombia	America	J1	1K Genomes Project (Poznik et al. 2016)
HG01256	CLM	Colombians from Medellin, Colombia	America	J1	1K Genomes Project (Poznik et al. 2016)
HG01130	CLM	Colombians from Medellin, Colombia	America	J1	1K Genomes Project (Poznik et al. 2016)
HG01431	CLM	Colombians from Medellin, Colombia	America	J1	1K Genomes Project (Poznik et al. 2016)
HG01437	CLM	Colombians from Medellin, Colombia	America	J1	1K Genomes Project (Poznik et al. 2016)
HG01571	PEL	Peruvians from Lima, Peru	America	J1	1K Genomes Project (Poznik et al. 2016)
HG01935	PEL	Peruvians from Lima, Peru	America	J1	1K Genomes Project (Poznik et al. 2016)
HG02253	PEL	Peruvians from Lima, Peru	America	J1	1K Genomes Project (Poznik et al. 2016)
HG01069	PUR	Puerto Ricans from Puerto Rico	America	J1	1K Genomes Project (Poznik et al. 2016)
HG01494	CLM	Colombians from Medellin, Colombia	America	J1	1K Genomes Project (Poznik et al. 2016)
HG01402	PUR	Puerto Ricans from Puerto Rico	America	J2	1K Genomes Project (Poznik et al. 2016)
HG01991	PEL	Peruvians from Lima, Peru	America	J2	1K Genomes Project (Poznik et al. 2016)
HG01164	PUR	Puerto Ricans from Puerto Rico	America	J2	1K Genomes Project (Poznik et al. 2016)
HG01412	PUR	Puerto Ricans from Puerto Rico	America	J2	1K Genomes Project (Poznik et al. 2016)
HG01944	PEL	Peruvians from Lima, Peru	America	Q1	1K Genomes Project (Poznik et al. 2016)
NA19774	MXL	Mexican Ancestry from Los Angeles, USA	America	Q1	1K Genomes Project (Poznik et al. 2016)
HG02090	PEL	Peruvians from Lima, Peru	America	Q1	1K Genomes Project (Poznik et al. 2016)
HG01124	CLM	Colombians from Medellin, Colombia	America	Q1	1K Genomes Project (Poznik et al. 2016)
HG01139	CLM	Colombians from Medellin, Colombia	America	Q1	1K Genomes Project (Poznik et al. 2016)
HG01142	CLM	Colombians from Medellin, Colombia	America	Q1	1K Genomes Project (Poznik et al. 2016)
NA19664	MXL	Mexican Ancestry from Los Angeles, USA	America	Q1	1K Genomes Project (Poznik et al. 2016)
NA19682	MXL	Mexican Ancestry from Los Angeles, USA	America	Q1	1K Genomes Project (Poznik et al. 2016)
NA19729	MXL	Mexican Ancestry from Los Angeles, USA	America	Q1	1K Genomes Project (Poznik et al. 2016)
NA19732	MXL	Mexican Ancestry from Los Angeles, USA	America	Q1	1K Genomes Project (Poznik et al. 2016)
NA19735	MXL	Mexican Ancestry from Los Angeles, USA	America	Q1	1K Genomes Project (Poznik et al. 2016)
NA19783	MXL	Mexican Ancestry from Los Angeles, USA	America	Q1	1K Genomes Project (Poznik et al. 2016)
NA19786	MXL	Mexican Ancestry from Los Angeles, USA	America	Q1	1K Genomes Project (Poznik et al. 2016)
HG01565	PEL	Peruvians from Lima, Peru	America	Q1	1K Genomes Project (Poznik et al. 2016)
HG01892	PEL	Peruvians from Lima, Peru	America	Q1	1K Genomes Project (Poznik et al. 2016)
HG01920	PEL	Peruvians from Lima, Peru	America	Q1	1K Genomes Project (Poznik et al. 2016)
HG01923	PEL	Peruvians from Lima, Peru	America	Q1	1K Genomes Project (Poznik et al. 2016)
HG01926	PEL	Peruvians from Lima, Peru	America	Q1	1K Genomes Project (Poznik et al. 2016)
HG01938	PEL	Peruvians from Lima, Peru	America	Q1	1K Genomes Project (Poznik et al. 2016)
HG01950	PEL	Peruvians from Lima, Peru	America	Q1	1K Genomes Project (Poznik et al. 2016)
HG01961	PEL	Peruvians from Lima, Peru	America	Q1	1K Genomes Project (Poznik et al. 2016)
HG01967	PEL	Peruvians from Lima, Peru	America	Q1	1K Genomes Project (Poznik et al. 2016)
HG01974	PEL	Peruvians from Lima, Peru	America	Q1	1K Genomes Project (Poznik et al. 2016)
HG01977	PEL	Peruvians from Lima, Peru	America	Q1	1K Genomes Project (Poznik et al. 2016)
HG01979	PEL	Peruvians from Lima, Peru	America	Q1	1K Genomes Project (Poznik et al. 2016)
HG02104	PEL	Peruvians from Lima, Peru	America	Q1	1K Genomes Project (Poznik et al. 2016)
HG02146	PEL	Peruvians from Lima, Peru	America	Q1	1K Genomes Project (Poznik et al. 2016)
HG02259	PEL	Peruvians from Lima, Peru	America	Q1	1K Genomes Project (Poznik et al. 2016)
HG02265	PEL	Peruvians from Lima, Peru	America	Q1	1K Genomes Project (Poznik et al. 2016)
HG02271	PEL	Peruvians from Lima, Peru	America	Q1	1K Genomes Project (Poznik et al. 2016)
HG02277	PEL	Peruvians from Lima, Peru	America	Q1	1K Genomes Project (Poznik et al. 2016)
HG02285	PEL	Peruvians from Lima, Peru	America	Q1	1K Genomes Project (Poznik et al. 2016)
HG02291	PEL	Peruvians from Lima, Peru	America	Q1	1K Genomes Project (Poznik et al. 2016)
HG02299	PEL	Peruvians from Lima, Peru	America	Q1	1K Genomes Project (Poznik et al. 2016)
HG02304	PEL	Peruvians from Lima, Peru	America	Q1	1K Genomes Project (Poznik et al. 2016)
NA19771	MXL	Mexican Ancestry from Los Angeles, USA	America	Q1	1K Genomes Project (Poznik et al. 2016)
NA19795	MXL	Mexican Ancestry from Los Angeles, USA	America	Q1	1K Genomes Project (Poznik et al. 2016)
HG01982	PEL	Peruvians from Lima, Peru	America	R1a	1K Genomes Project (Poznik et al. 2016)
HG01947	PEL	Peruvians from Lima, Peru	America	R1b	1K Genomes Project (Poznik et al. 2016)
HG00640	PUR	Puerto Ricans from Puerto Rico	America	R1b	1K Genomes Project (Poznik et al. 2016)
HG01066	PUR	Puerto Ricans from Puerto Rico	America	R1b	1K Genomes Project (Poznik et al. 2016)
HG01389	CLM	Colombians from Medellin, Colombia	America	R1b	1K Genomes Project (Poznik et al. 2016)
HG01550	CLM	Colombians from Medellin, Colombia	America	R1b	1K Genomes Project (Poznik et al. 2016)
HG01917	PEL	Peruvians from Lima, Peru	America	R1b	1K Genomes Project (Poznik et al. 2016)
HG02008	PEL	Peruvians from Lima, Peru	America	R1b	1K Genomes Project (Poznik et al. 2016)
HG01082	PUR	Puerto Ricans from Puerto Rico	America	R1b	1K Genomes Project (Poznik et al. 2016)
HG01170	PUR	Puerto Ricans from Puerto Rico	America	R1b	1K Genomes Project (Poznik et al. 2016)
HG01121	CLM	Colombians from Medellin, Colombia	America	R1b	1K Genomes Project (Poznik et al. 2016)
HG01341	CLM	Colombians from Medellin, Colombia	America	R1b	1K Genomes Project (Poznik et al. 2016)
HG01350	CLM	Colombians from Medellin, Colombia	America	R1b	1K Genomes Project (Poznik et al. 2016)
HG01353	CLM	Colombians from Medellin, Colombia	America	R1b	1K Genomes Project (Poznik et al. 2016)
HG01443	CLM	Colombians from Medellin, Colombia	America	R1b	1K Genomes Project (Poznik et al. 2016)
HG01461	CLM	Colombians from Medellin, Colombia	America	R1b	1K Genomes Project (Poznik et al. 2016)
HG01491	CLM	Colombians from Medellin, Colombia	America	R1b	1K Genomes Project (Poznik et al. 2016)
NA19762	MXL	Mexican Ancestry from Los Angeles, USA	America	R1b	1K Genomes Project (Poznik et al. 2016)
HG01577	PEL	Peruvians from Lima, Peru	America	R1b	1K Genomes Project (Poznik et al. 2016)
HG02002	PEL	Peruvians from Lima, Peru	America	R1b	1K Genomes Project (Poznik et al. 2016)
HG00731	PUR	Puerto Ricans from Puerto Rico	America	R1b	1K Genomes Project (Poznik et al. 2016)
HG00739	PUR	Puerto Ricans from Puerto Rico	America	R1b	1K Genomes Project (Poznik et al. 2016)
HG00742	PUR	Puerto Ricans from Puerto Rico	America	R1b	1K Genomes Project (Poznik et al. 2016)
HG01048	PUR	Puerto Ricans from Puerto Rico	America	R1b	1K Genomes Project (Poznik et al. 2016)
HG01063	PUR	Puerto Ricans from Puerto Rico	America	R1b	1K Genomes Project (Poznik et al. 2016)
HG01085	PUR	Puerto Ricans from Puerto Rico	America	R1b	1K Genomes Project (Poznik et al. 2016)
HG01176	PUR	Puerto Ricans from Puerto Rico	America	R1b	1K Genomes Project (Poznik et al. 2016)
HG01182	PUR	Puerto Ricans from Puerto Rico	America	R1b	1K Genomes Project (Poznik et al. 2016)
HG01241	PUR	Puerto Ricans from Puerto Rico	America	R1b	1K Genomes Project (Poznik et al. 2016)
HG01247	PUR	Puerto Ricans from Puerto Rico	America	R1b	1K Genomes Project (Poznik et al. 2016)
HG01395	PUR	Puerto Ricans from Puerto Rico	America	R1b	1K Genomes Project (Poznik et al. 2016)
HG01398	PUR	Puerto Ricans from Puerto Rico	America	R1b	1K Genomes Project (Poznik et al. 2016)
HG01413	PUR	Puerto Ricans from Puerto Rico	America	R1b	1K Genomes Project (Poznik et al. 2016)
HG01148	CLM	Colombians from Medellin, Colombia	America	R1b	1K Genomes Project (Poznik et al. 2016)
HG01365	CLM	Colombians from Medellin, Colombia	America	R1b	1K Genomes Project (Poznik et al. 2016)
HG01271	CLM	Colombians from Medellin, Colombia	America	R1b	1K Genomes Project (Poznik et al. 2016)
HG01479	CLM	Colombians from Medellin, Colombia	America	R1b	1K Genomes Project (Poznik et al. 2016)
HG01440	CLM	Colombians from Medellin, Colombia	America	R1b	1K Genomes Project (Poznik et al. 2016)
HG01286	PUR	Puerto Ricans from Puerto Rico	America	R1b	1K Genomes Project (Poznik et al. 2016)
HG01259	CLM	Colombians from Medellin, Colombia	America	R1b	1K Genomes Project (Poznik et al. 2016)
HG01488	CLM	Colombians from Medellin, Colombia	America	R1b	1K Genomes Project (Poznik et al. 2016)
NA19750	MXL	Mexican Ancestry from Los Angeles, USA	America	R1b	1K Genomes Project (Poznik et al. 2016)
HG00637	PUR	Puerto Ricans from Puerto Rico	America	R1b	1K Genomes Project (Poznik et al. 2016)
HG01173	PUR	Puerto Ricans from Puerto Rico	America	R1b	1K Genomes Project (Poznik et al. 2016)
HG01280	CLM	Colombians from Medellin, Colombia	America	R1b	1K Genomes Project (Poznik et al. 2016)
HG01932	PEL	Peruvians from Lima, Peru	America	R1b	1K Genomes Project (Poznik et al. 2016)
HG01047	PUR	Puerto Ricans from Puerto Rico	America	R1b	1K Genomes Project (Poznik et al. 2016)
HG01359	CLM	Colombians from Medellin, Colombia	America	R1b	1K Genomes Project (Poznik et al. 2016)
HG01374	CLM	Colombians from Medellin, Colombia	America	R1b	1K Genomes Project (Poznik et al. 2016)
HG01464	CLM	Colombians from Medellin, Colombia	America	R1b	1K Genomes Project (Poznik et al. 2016)
NA19741	MXL	Mexican Ancestry from Los Angeles, USA	America	R1b	1K Genomes Project (Poznik et al. 2016)
NA19777	MXL	Mexican Ancestry from Los Angeles, USA	America	R1b	1K Genomes Project (Poznik et al. 2016)
NA19756	MXL	Mexican Ancestry from Los Angeles, USA	America	R1b	1K Genomes Project (Poznik et al. 2016)
HG01075	PUR	Puerto Ricans from Puerto Rico	America	R1b	1K Genomes Project (Poznik et al. 2016)
HG01392	PUR	Puerto Ricans from Puerto Rico	America	R1b	1K Genomes Project (Poznik et al. 2016)
HG01383	CLM	Colombians from Medellin, Colombia	America	R1b	1K Genomes Project (Poznik et al. 2016)
NA19661	MXL	Mexican Ancestry from Los Angeles, USA	America	R1b	1K Genomes Project (Poznik et al. 2016)
NA19679	MXL	Mexican Ancestry from Los Angeles, USA	America	R1b	1K Genomes Project (Poznik et al. 2016)
NA19685	MXL	Mexican Ancestry from Los Angeles, USA	America	R1b	1K Genomes Project (Poznik et al. 2016)
NA19720	MXL	Mexican Ancestry from Los Angeles, USA	America	R1b	1K Genomes Project (Poznik et al. 2016)
HG01941	PEL	Peruvians from Lima, Peru	America	R1b	1K Genomes Project (Poznik et al. 2016)
HG00736	PUR	Puerto Ricans from Puerto Rico	America	R1b	1K Genomes Project (Poznik et al. 2016)
HG01060	PUR	Puerto Ricans from Puerto Rico	America	R1b	1K Genomes Project (Poznik et al. 2016)
HG01356	CLM	Colombians from Medellin, Colombia	America	R1b	1K Genomes Project (Poznik et al. 2016)
NA19649	MXL	Mexican Ancestry from Los Angeles, USA	America	R1b	1K Genomes Project (Poznik et al. 2016)
HG02262	PEL	Peruvians from Lima, Peru	America	R1b	1K Genomes Project (Poznik et al. 2016)
NA19652	MXL	Mexican Ancestry from Los Angeles, USA	America	R1b	1K Genomes Project (Poznik et al. 2016)
NA19658	MXL	Mexican Ancestry from Los Angeles, USA	America	R1b	1K Genomes Project (Poznik et al. 2016)
HG01953	PEL	Peruvians from Lima, Peru	America	R1b	1K Genomes Project (Poznik et al. 2016)
HG01079	PUR	Puerto Ricans from Puerto Rico	America	R1b	1K Genomes Project (Poznik et al. 2016)
HG01136	CLM	Colombians from Medellin, Colombia	America	R1b	1K Genomes Project (Poznik et al. 2016)
NA19717	MXL	Mexican Ancestry from Los Angeles, USA	America	R1b	1K Genomes Project (Poznik et al. 2016)
HG01405	PUR	Puerto Ricans from Puerto Rico	America	R1b	1K Genomes Project (Poznik et al. 2016)
HG01277	CLM	Colombians from Medellin, Colombia	America	R1b	1K Genomes Project (Poznik et al. 2016)
HG01133	CLM	Colombians from Medellin, Colombia	America	T	1K Genomes Project (Poznik et al. 2016)
NA19655	MXL	Mexican Ancestry from Los Angeles, USA	America	T	1K Genomes Project (Poznik et al. 2016)
HG01051	PUR	Puerto Ricans from Puerto Rico	America	T	1K Genomes Project (Poznik et al. 2016)
HG00628	CHS	Southern Han Chinese	EastAsia	C2b	1K Genomes Project (Poznik et al. 2016)
NA19079	JPT	Japan	EastAsia	C2b	1K Genomes Project (Poznik et al. 2016)
NA18612	CHB	Han Chinese in Beijing, China	EastAsia	C2b	1K Genomes Project (Poznik et al. 2016)
NA18620	CHB	Han Chinese in Beijing, China	EastAsia	C2b	1K Genomes Project (Poznik et al. 2016)
NA18749	CHB	Han Chinese in Beijing, China	EastAsia	C2b	1K Genomes Project (Poznik et al. 2016)
NA19091	JPT	Japan	EastAsia	C2b	1K Genomes Project (Poznik et al. 2016)
NA18960	JPT	Japan	EastAsia	D1a2	1K Genomes Project (Poznik et al. 2016)
NA18961	JPT	Japan	EastAsia	D1a2	1K Genomes Project (Poznik et al. 2016)
NA18970	JPT	Japan	EastAsia	D1a2	1K Genomes Project (Poznik et al. 2016)
NA18995	JPT	Japan	EastAsia	D1a2	1K Genomes Project (Poznik et al. 2016)
NA19004	JPT	Japan	EastAsia	D1a2	1K Genomes Project (Poznik et al. 2016)
NA19056	JPT	Japan	EastAsia	D1a2	1K Genomes Project (Poznik et al. 2016)
NA19063	JPT	Japan	EastAsia	D1a2	1K Genomes Project (Poznik et al. 2016)
NA19089	JPT	Japan	EastAsia	D1a2	1K Genomes Project (Poznik et al. 2016)
NA18944	JPT	Japan	EastAsia	D1a2	1K Genomes Project (Poznik et al. 2016)
NA18948	JPT	Japan	EastAsia	D1a2	1K Genomes Project (Poznik et al. 2016)
NA18967	JPT	Japan	EastAsia	D1a2	1K Genomes Project (Poznik et al. 2016)
NA18983	JPT	Japan	EastAsia	D1a2	1K Genomes Project (Poznik et al. 2016)
NA18988	JPT	Japan	EastAsia	D1a2	1K Genomes Project (Poznik et al. 2016)
NA19012	JPT	Japan	EastAsia	D1a2	1K Genomes Project (Poznik et al. 2016)
NA19058	JPT	Japan	EastAsia	D1a2	1K Genomes Project (Poznik et al. 2016)
NA19068	JPT	Japan	EastAsia	D1a2	1K Genomes Project (Poznik et al. 2016)
NA19082	JPT	Japan	EastAsia	D1a2	1K Genomes Project (Poznik et al. 2016)
NA18549	CHB	Han Chinese in Beijing, China	EastAsia	G2	1K Genomes Project (Poznik et al. 2016)
NA18558	CHB	Han Chinese in Beijing, China	EastAsia	N	1K Genomes Project (Poznik et al. 2016)
NA18608	CHB	Han Chinese in Beijing, China	EastAsia	N	1K Genomes Project (Poznik et al. 2016)
NA18639	CHB	Han Chinese in Beijing, China	EastAsia	N	1K Genomes Project (Poznik et al. 2016)
NA18747	CHB	Han Chinese in Beijing, China	EastAsia	N	1K Genomes Project (Poznik et al. 2016)
NA18748	CHB	Han Chinese in Beijing, China	EastAsia	N	1K Genomes Project (Poznik et al. 2016)
NA18613	CHB	Han Chinese in Beijing, China	EastAsia	N1	1K Genomes Project (Poznik et al. 2016)
HG01811	CDX	Chinese Dai in Xishuangbanna	EastAsia	O1	1K Genomes Project (Poznik et al. 2016)
HG02250	CDX	Chinese Dai in Xishuangbanna	EastAsia	O1	1K Genomes Project (Poznik et al. 2016)
HG02353	CDX	Chinese Dai in Xishuangbanna	EastAsia	O1	1K Genomes Project (Poznik et al. 2016)
HG02360	CDX	Chinese Dai in Xishuangbanna	EastAsia	O1	1K Genomes Project (Poznik et al. 2016)
HG02363	CDX	Chinese Dai in Xishuangbanna	EastAsia	O1	1K Genomes Project (Poznik et al. 2016)
HG02377	CDX	Chinese Dai in Xishuangbanna	EastAsia	O1	1K Genomes Project (Poznik et al. 2016)
HG02396	CDX	Chinese Dai in Xishuangbanna	EastAsia	O1	1K Genomes Project (Poznik et al. 2016)
HG02399	CDX	Chinese Dai in Xishuangbanna	EastAsia	O1	1K Genomes Project (Poznik et al. 2016)
NA18536	CHB	Han Chinese in Beijing, China	EastAsia	O1	1K Genomes Project (Poznik et al. 2016)
NA18606	CHB	Han Chinese in Beijing, China	EastAsia	O1	1K Genomes Project (Poznik et al. 2016)
NA18632	CHB	Han Chinese in Beijing, China	EastAsia	O1	1K Genomes Project (Poznik et al. 2016)
NA18647	CHB	Han Chinese in Beijing, China	EastAsia	O1	1K Genomes Project (Poznik et al. 2016)
NA18740	CHB	Han Chinese in Beijing, China	EastAsia	O1	1K Genomes Project (Poznik et al. 2016)
HG00580	CHS	Southern Han Chinese	EastAsia	O1	1K Genomes Project (Poznik et al. 2016)
NA18534	CHB	Han Chinese in Beijing, China	EastAsia	O1	1K Genomes Project (Poznik et al. 2016)
NA18603	CHB	Han Chinese in Beijing, China	EastAsia	O1	1K Genomes Project (Poznik et al. 2016)
NA18637	CHB	Han Chinese in Beijing, China	EastAsia	O1	1K Genomes Project (Poznik et al. 2016)
HG00406	CHS	Southern Han Chinese	EastAsia	O1	1K Genomes Project (Poznik et al. 2016)
HG00634	CHS	Southern Han Chinese	EastAsia	O1	1K Genomes Project (Poznik et al. 2016)
NA19055	JPT	Japan	EastAsia	O1	1K Genomes Project (Poznik et al. 2016)
NA18638	CHB	Han Chinese in Beijing, China	EastAsia	O1	1K Genomes Project (Poznik et al. 2016)
HG00457	CHS	Southern Han Chinese	EastAsia	O1	1K Genomes Project (Poznik et al. 2016)
HG01028	CDX	Chinese Dai in Xishuangbanna	EastAsia	O1	1K Genomes Project (Poznik et al. 2016)
HG01031	CDX	Chinese Dai in Xishuangbanna	EastAsia	O1	1K Genomes Project (Poznik et al. 2016)
HG02389	CDX	Chinese Dai in Xishuangbanna	EastAsia	O1	1K Genomes Project (Poznik et al. 2016)
HG02390	CDX	Chinese Dai in Xishuangbanna	EastAsia	O1	1K Genomes Project (Poznik et al. 2016)
HG02401	CDX	Chinese Dai in Xishuangbanna	EastAsia	O1	1K Genomes Project (Poznik et al. 2016)
HG02402	CDX	Chinese Dai in Xishuangbanna	EastAsia	O1	1K Genomes Project (Poznik et al. 2016)
HG02407	CDX	Chinese Dai in Xishuangbanna	EastAsia	O1	1K Genomes Project (Poznik et al. 2016)
NA18636	CHB	Han Chinese in Beijing, China	EastAsia	O1	1K Genomes Project (Poznik et al. 2016)
HG00442	CHS	Southern Han Chinese	EastAsia	O1	1K Genomes Project (Poznik et al. 2016)
NA19009	JPT	Japan	EastAsia	O1	1K Genomes Project (Poznik et al. 2016)
HG02351	CDX	Chinese Dai in Xishuangbanna	EastAsia	O1	1K Genomes Project (Poznik et al. 2016)
HG02364	CDX	Chinese Dai in Xishuangbanna	EastAsia	O1	1K Genomes Project (Poznik et al. 2016)
HG02382	CDX	Chinese Dai in Xishuangbanna	EastAsia	O1	1K Genomes Project (Poznik et al. 2016)
HG02394	CDX	Chinese Dai in Xishuangbanna	EastAsia	O1	1K Genomes Project (Poznik et al. 2016)
HG02395	CDX	Chinese Dai in Xishuangbanna	EastAsia	O1	1K Genomes Project (Poznik et al. 2016)
HG02397	CDX	Chinese Dai in Xishuangbanna	EastAsia	O1	1K Genomes Project (Poznik et al. 2016)
HG02398	CDX	Chinese Dai in Xishuangbanna	EastAsia	O1	1K Genomes Project (Poznik et al. 2016)
HG02408	CDX	Chinese Dai in Xishuangbanna	EastAsia	O1	1K Genomes Project (Poznik et al. 2016)
HG02410	CDX	Chinese Dai in Xishuangbanna	EastAsia	O1	1K Genomes Project (Poznik et al. 2016)
HG00701	CHS	Southern Han Chinese	EastAsia	O1	1K Genomes Project (Poznik et al. 2016)
HG00728	CHS	Southern Han Chinese	EastAsia	O1	1K Genomes Project (Poznik et al. 2016)
NA18563	CHB	Han Chinese in Beijing, China	EastAsia	O1	1K Genomes Project (Poznik et al. 2016)
HG00530	CHS	Southern Han Chinese	EastAsia	O1	1K Genomes Project (Poznik et al. 2016)
HG00533	CHS	Southern Han Chinese	EastAsia	O1	1K Genomes Project (Poznik et al. 2016)
NA18943	JPT	Japan	EastAsia	O1	1K Genomes Project (Poznik et al. 2016)
NA18953	JPT	Japan	EastAsia	O1	1K Genomes Project (Poznik et al. 2016)
NA18962	JPT	Japan	EastAsia	O1	1K Genomes Project (Poznik et al. 2016)
NA18965	JPT	Japan	EastAsia	O1	1K Genomes Project (Poznik et al. 2016)
NA18977	JPT	Japan	EastAsia	O1	1K Genomes Project (Poznik et al. 2016)
NA18985	JPT	Japan	EastAsia	O1	1K Genomes Project (Poznik et al. 2016)
NA18986	JPT	Japan	EastAsia	O1	1K Genomes Project (Poznik et al. 2016)
NA18990	JPT	Japan	EastAsia	O1	1K Genomes Project (Poznik et al. 2016)
NA18994	JPT	Japan	EastAsia	O1	1K Genomes Project (Poznik et al. 2016)
NA19000	JPT	Japan	EastAsia	O1	1K Genomes Project (Poznik et al. 2016)
NA19005	JPT	Japan	EastAsia	O1	1K Genomes Project (Poznik et al. 2016)
NA19060	JPT	Japan	EastAsia	O1	1K Genomes Project (Poznik et al. 2016)
NA19066	JPT	Japan	EastAsia	O1	1K Genomes Project (Poznik et al. 2016)
NA19067	JPT	Japan	EastAsia	O1	1K Genomes Project (Poznik et al. 2016)
NA19070	JPT	Japan	EastAsia	O1	1K Genomes Project (Poznik et al. 2016)
NA19088	JPT	Japan	EastAsia	O1	1K Genomes Project (Poznik et al. 2016)
NA18561	CHB	Han Chinese in Beijing, China	EastAsia	O1	1K Genomes Project (Poznik et al. 2016)
NA19075	JPT	Japan	EastAsia	O1	1K Genomes Project (Poznik et al. 2016)
HG00559	CHS	Southern Han Chinese	EastAsia	O2	1K Genomes Project (Poznik et al. 2016)
NA18605	CHB	Han Chinese in Beijing, China	EastAsia	O2	1K Genomes Project (Poznik et al. 2016)
NA18745	CHB	Han Chinese in Beijing, China	EastAsia	O2	1K Genomes Project (Poznik et al. 2016)
HG00463	CHS	Southern Han Chinese	EastAsia	O2	1K Genomes Project (Poznik et al. 2016)
HG00475	CHS	Southern Han Chinese	EastAsia	O2	1K Genomes Project (Poznik et al. 2016)
HG00478	CHS	Southern Han Chinese	EastAsia	O2	1K Genomes Project (Poznik et al. 2016)
HG00500	CHS	Southern Han Chinese	EastAsia	O2	1K Genomes Project (Poznik et al. 2016)
HG00536	CHS	Southern Han Chinese	EastAsia	O2	1K Genomes Project (Poznik et al. 2016)
HG00542	CHS	Southern Han Chinese	EastAsia	O2	1K Genomes Project (Poznik et al. 2016)
HG02392	CDX	Chinese Dai in Xishuangbanna	EastAsia	O2	1K Genomes Project (Poznik et al. 2016)
NA18984	JPT	Japan	EastAsia	O2	1K Genomes Project (Poznik et al. 2016)
NA18559	CHB	Han Chinese in Beijing, China	EastAsia	O2	1K Genomes Project (Poznik et al. 2016)
NA18611	CHB	Han Chinese in Beijing, China	EastAsia	O2	1K Genomes Project (Poznik et al. 2016)
NA18629	CHB	Han Chinese in Beijing, China	EastAsia	O2	1K Genomes Project (Poznik et al. 2016)
NA18633	CHB	Han Chinese in Beijing, China	EastAsia	O2	1K Genomes Project (Poznik et al. 2016)
HG00403	CHS	Southern Han Chinese	EastAsia	O2	1K Genomes Project (Poznik et al. 2016)
HG00421	CHS	Southern Han Chinese	EastAsia	O2	1K Genomes Project (Poznik et al. 2016)
HG00445	CHS	Southern Han Chinese	EastAsia	O2	1K Genomes Project (Poznik et al. 2016)
HG00451	CHS	Southern Han Chinese	EastAsia	O2	1K Genomes Project (Poznik et al. 2016)
HG00607	CHS	Southern Han Chinese	EastAsia	O2	1K Genomes Project (Poznik et al. 2016)
HG00707	CHS	Southern Han Chinese	EastAsia	O2	1K Genomes Project (Poznik et al. 2016)
NA18982	JPT	Japan	EastAsia	O2	1K Genomes Project (Poznik et al. 2016)
HG00472	CHS	Southern Han Chinese	EastAsia	O2	1K Genomes Project (Poznik et al. 2016)
HG01816	CDX	Chinese Dai in Xishuangbanna	EastAsia	O2	1K Genomes Project (Poznik et al. 2016)
NA18621	CHB	Han Chinese in Beijing, China	EastAsia	O2	1K Genomes Project (Poznik et al. 2016)
HG00622	CHS	Southern Han Chinese	EastAsia	O2	1K Genomes Project (Poznik et al. 2016)
HG00625	CHS	Southern Han Chinese	EastAsia	O2	1K Genomes Project (Poznik et al. 2016)
HG00653	CHS	Southern Han Chinese	EastAsia	O2	1K Genomes Project (Poznik et al. 2016)
HG00671	CHS	Southern Han Chinese	EastAsia	O2	1K Genomes Project (Poznik et al. 2016)
HG00674	CHS	Southern Han Chinese	EastAsia	O2	1K Genomes Project (Poznik et al. 2016)
HG00689	CHS	Southern Han Chinese	EastAsia	O2	1K Genomes Project (Poznik et al. 2016)
HG00692	CHS	Southern Han Chinese	EastAsia	O2	1K Genomes Project (Poznik et al. 2016)
HG00698	CHS	Southern Han Chinese	EastAsia	O2	1K Genomes Project (Poznik et al. 2016)
HG00704	CHS	Southern Han Chinese	EastAsia	O2	1K Genomes Project (Poznik et al. 2016)
HG02367	CDX	Chinese Dai in Xishuangbanna	EastAsia	O2	1K Genomes Project (Poznik et al. 2016)
NA18543	CHB	Han Chinese in Beijing, China	EastAsia	O2	1K Genomes Project (Poznik et al. 2016)
NA18546	CHB	Han Chinese in Beijing, China	EastAsia	O2	1K Genomes Project (Poznik et al. 2016)
NA18562	CHB	Han Chinese in Beijing, China	EastAsia	O2	1K Genomes Project (Poznik et al. 2016)
NA18572	CHB	Han Chinese in Beijing, China	EastAsia	O2	1K Genomes Project (Poznik et al. 2016)
NA18609	CHB	Han Chinese in Beijing, China	EastAsia	O2	1K Genomes Project (Poznik et al. 2016)
NA18635	CHB	Han Chinese in Beijing, China	EastAsia	O2	1K Genomes Project (Poznik et al. 2016)
NA18643	CHB	Han Chinese in Beijing, China	EastAsia	O2	1K Genomes Project (Poznik et al. 2016)
NA18648	CHB	Han Chinese in Beijing, China	EastAsia	O2	1K Genomes Project (Poznik et al. 2016)
HG00524	CHS	Southern Han Chinese	EastAsia	O2	1K Genomes Project (Poznik et al. 2016)
NA19076	JPT	Japan	EastAsia	O2	1K Genomes Project (Poznik et al. 2016)
NA19083	JPT	Japan	EastAsia	O2	1K Genomes Project (Poznik et al. 2016)
HG01810	CDX	Chinese Dai in Xishuangbanna	EastAsia	O2	1K Genomes Project (Poznik et al. 2016)
HG02355	CDX	Chinese Dai in Xishuangbanna	EastAsia	O2	1K Genomes Project (Poznik et al. 2016)
HG02371	CDX	Chinese Dai in Xishuangbanna	EastAsia	O2	1K Genomes Project (Poznik et al. 2016)
HG02379	CDX	Chinese Dai in Xishuangbanna	EastAsia	O2	1K Genomes Project (Poznik et al. 2016)
HG02380	CDX	Chinese Dai in Xishuangbanna	EastAsia	O2	1K Genomes Project (Poznik et al. 2016)
HG02387	CDX	Chinese Dai in Xishuangbanna	EastAsia	O2	1K Genomes Project (Poznik et al. 2016)
HG02406	CDX	Chinese Dai in Xishuangbanna	EastAsia	O2	1K Genomes Project (Poznik et al. 2016)
NA18530	CHB	Han Chinese in Beijing, China	EastAsia	O2	1K Genomes Project (Poznik et al. 2016)
NA18548	CHB	Han Chinese in Beijing, China	EastAsia	O2	1K Genomes Project (Poznik et al. 2016)
NA18557	CHB	Han Chinese in Beijing, China	EastAsia	O2	1K Genomes Project (Poznik et al. 2016)
NA18622	CHB	Han Chinese in Beijing, China	EastAsia	O2	1K Genomes Project (Poznik et al. 2016)
NA18623	CHB	Han Chinese in Beijing, China	EastAsia	O2	1K Genomes Project (Poznik et al. 2016)
NA18624	CHB	Han Chinese in Beijing, China	EastAsia	O2	1K Genomes Project (Poznik et al. 2016)
NA18757	CHB	Han Chinese in Beijing, China	EastAsia	O2	1K Genomes Project (Poznik et al. 2016)
HG00409	CHS	Southern Han Chinese	EastAsia	O2	1K Genomes Project (Poznik et al. 2016)
HG00565	CHS	Southern Han Chinese	EastAsia	O2	1K Genomes Project (Poznik et al. 2016)
HG00592	CHS	Southern Han Chinese	EastAsia	O2	1K Genomes Project (Poznik et al. 2016)
HG00598	CHS	Southern Han Chinese	EastAsia	O2	1K Genomes Project (Poznik et al. 2016)
HG00619	CHS	Southern Han Chinese	EastAsia	O2	1K Genomes Project (Poznik et al. 2016)
NA18945	JPT	Japan	EastAsia	O2	1K Genomes Project (Poznik et al. 2016)
NA19062	JPT	Japan	EastAsia	O2	1K Genomes Project (Poznik et al. 2016)
NA19072	JPT	Japan	EastAsia	O2	1K Genomes Project (Poznik et al. 2016)
NA19085	JPT	Japan	EastAsia	O2	1K Genomes Project (Poznik et al. 2016)
NA19086	JPT	Japan	EastAsia	O2	1K Genomes Project (Poznik et al. 2016)
HG00556	CHS	Southern Han Chinese	EastAsia	O2	1K Genomes Project (Poznik et al. 2016)
HG00631	CHS	Southern Han Chinese	EastAsia	O2	1K Genomes Project (Poznik et al. 2016)
NA18645	CHB	Han Chinese in Beijing, China	EastAsia	R1b	1K Genomes Project (Poznik et al. 2016)
NA20510	TSI	Toscani in Italy	Europe	E1b	1K Genomes Project (Poznik et al. 2016)
NA20516	TSI	Toscani in Italy	Europe	E1b	1K Genomes Project (Poznik et al. 2016)
NA20528	TSI	Toscani in Italy	Europe	E1b	1K Genomes Project (Poznik et al. 2016)
NA20544	TSI	Toscani in Italy	Europe	E1b	1K Genomes Project (Poznik et al. 2016)
HG01699	IBS	Iberian Population in Spain	Europe	E1b	1K Genomes Project (Poznik et al. 2016)
HG01680	IBS	Iberian Population in Spain	Europe	E1b	1K Genomes Project (Poznik et al. 2016)
NA12286	CEU	Utah	Europe	G2	1K Genomes Project (Poznik et al. 2016)
HG02224	IBS	Iberian Population in Spain	Europe	G2	1K Genomes Project (Poznik et al. 2016)
NA20767	TSI	Toscani in Italy	Europe	G2	1K Genomes Project (Poznik et al. 2016)
NA12546	CEU	Utah	Europe	G2	1K Genomes Project (Poznik et al. 2016)
NA20536	TSI	Toscani in Italy	Europe	G2	1K Genomes Project (Poznik et al. 2016)
NA12777	CEU	Utah	Europe	G2	1K Genomes Project (Poznik et al. 2016)
HG01512	IBS	Iberian Population in Spain	Europe	G2	1K Genomes Project (Poznik et al. 2016)
NA07051	CEU	Utah	Europe	I1	1K Genomes Project (Poznik et al. 2016)
NA11992	CEU	Utah	Europe	I1	1K Genomes Project (Poznik et al. 2016)
HG00140	GBR	British in England and Scotland	Europe	I1	1K Genomes Project (Poznik et al. 2016)
HG00186	FIN	Finland	Europe	I1	1K Genomes Project (Poznik et al. 2016)
HG00308	FIN	Finland	Europe	I1	1K Genomes Project (Poznik et al. 2016)
HG00321	FIN	Finland	Europe	I1	1K Genomes Project (Poznik et al. 2016)
HG00325	FIN	Finland	Europe	I1	1K Genomes Project (Poznik et al. 2016)
HG00345	FIN	Finland	Europe	I1	1K Genomes Project (Poznik et al. 2016)
HG00189	FIN	Finland	Europe	I1	1K Genomes Project (Poznik et al. 2016)
NA11829	CEU	Utah	Europe	I1	1K Genomes Project (Poznik et al. 2016)
NA11881	CEU	Utah	Europe	I1	1K Genomes Project (Poznik et al. 2016)
NA12750	CEU	Utah	Europe	I1	1K Genomes Project (Poznik et al. 2016)
HG00252	GBR	British in England and Scotland	Europe	I1	1K Genomes Project (Poznik et al. 2016)
NA06994	CEU	Utah	Europe	I1	1K Genomes Project (Poznik et al. 2016)
HG00159	GBR	British in England and Scotland	Europe	I1	1K Genomes Project (Poznik et al. 2016)
NA20762	TSI	Toscani in Italy	Europe	I1	1K Genomes Project (Poznik et al. 2016)
HG00234	GBR	British in England and Scotland	Europe	I1	1K Genomes Project (Poznik et al. 2016)
NA20511	TSI	Toscani in Italy	Europe	I1	1K Genomes Project (Poznik et al. 2016)
HG00310	FIN	Finland	Europe	I1	1K Genomes Project (Poznik et al. 2016)
NA11919	CEU	Utah	Europe	I1	1K Genomes Project (Poznik et al. 2016)
NA11893	CEU	Utah	Europe	I1	1K Genomes Project (Poznik et al. 2016)
HG01610	IBS	Iberian Population in Spain	Europe	I2	1K Genomes Project (Poznik et al. 2016)
NA11932	CEU	Utah	Europe	I2	1K Genomes Project (Poznik et al. 2016)
HG01527	IBS	Iberian Population in Spain	Europe	I2	1K Genomes Project (Poznik et al. 2016)
NA12413	CEU	Utah	Europe	I2	1K Genomes Project (Poznik et al. 2016)
NA12748	CEU	Utah	Europe	I2	1K Genomes Project (Poznik et al. 2016)
NA12282	CEU	Utah	Europe	J1	1K Genomes Project (Poznik et al. 2016)
NA20543	TSI	Toscani in Italy	Europe	J1	1K Genomes Project (Poznik et al. 2016)
HG02236	IBS	Iberian Population in Spain	Europe	J2	1K Genomes Project (Poznik et al. 2016)
NA20534	TSI	Toscani in Italy	Europe	J2	1K Genomes Project (Poznik et al. 2016)
NA20513	TSI	Toscani in Italy	Europe	J2	1K Genomes Project (Poznik et al. 2016)
NA20765	TSI	Toscani in Italy	Europe	J2	1K Genomes Project (Poznik et al. 2016)
NA20815	TSI	Toscani in Italy	Europe	J2	1K Genomes Project (Poznik et al. 2016)
NA20827	TSI	Toscani in Italy	Europe	J2	1K Genomes Project (Poznik et al. 2016)
NA20521	TSI	Toscani in Italy	Europe	J2	1K Genomes Project (Poznik et al. 2016)
NA20787	TSI	Toscani in Italy	Europe	J2	1K Genomes Project (Poznik et al. 2016)
NA20801	TSI	Toscani in Italy	Europe	J2	1K Genomes Project (Poznik et al. 2016)
HG01781	IBS	Iberian Population in Spain	Europe	J2	1K Genomes Project (Poznik et al. 2016)
HG01672	IBS	Iberian Population in Spain	Europe	J2	1K Genomes Project (Poznik et al. 2016)
NA20778	TSI	Toscani in Italy	Europe	J2	1K Genomes Project (Poznik et al. 2016)
NA20805	TSI	Toscani in Italy	Europe	J2	1K Genomes Project (Poznik et al. 2016)
NA20809	TSI	Toscani in Italy	Europe	J2	1K Genomes Project (Poznik et al. 2016)
NA20588	TSI	Toscani in Italy	Europe	J2	1K Genomes Project (Poznik et al. 2016)
NA20763	TSI	Toscani in Italy	Europe	J2	1K Genomes Project (Poznik et al. 2016)
HG00160	GBR	British in England and Scotland	Europe	J2	1K Genomes Project (Poznik et al. 2016)
NA11930	CEU	Utah	Europe	J2	1K Genomes Project (Poznik et al. 2016)
HG01509	IBS	Iberian Population in Spain	Europe	J2	1K Genomes Project (Poznik et al. 2016)
NA20525	TSI	Toscani in Italy	Europe	J2	1K Genomes Project (Poznik et al. 2016)
NA20811	TSI	Toscani in Italy	Europe	J2	1K Genomes Project (Poznik et al. 2016)
HG00342	FIN	Finland	Europe	N1	1K Genomes Project (Poznik et al. 2016)
HG00341	FIN	Finland	Europe	N1	1K Genomes Project (Poznik et al. 2016)
HG00375	FIN	Finland	Europe	N1	1K Genomes Project (Poznik et al. 2016)
HG00182	FIN	Finland	Europe	N1	1K Genomes Project (Poznik et al. 2016)
HG00183	FIN	Finland	Europe	N1	1K Genomes Project (Poznik et al. 2016)
HG00187	FIN	Finland	Europe	N1	1K Genomes Project (Poznik et al. 2016)
HG00278	FIN	Finland	Europe	N1	1K Genomes Project (Poznik et al. 2016)
HG00311	FIN	Finland	Europe	N1	1K Genomes Project (Poznik et al. 2016)
HG00329	FIN	Finland	Europe	N1	1K Genomes Project (Poznik et al. 2016)
HG00188	FIN	Finland	Europe	N1	1K Genomes Project (Poznik et al. 2016)
HG00271	FIN	Finland	Europe	N1	1K Genomes Project (Poznik et al. 2016)
HG00290	FIN	Finland	Europe	N1	1K Genomes Project (Poznik et al. 2016)
HG00335	FIN	Finland	Europe	N1	1K Genomes Project (Poznik et al. 2016)
HG00336	FIN	Finland	Europe	N1	1K Genomes Project (Poznik et al. 2016)
HG00338	FIN	Finland	Europe	N1	1K Genomes Project (Poznik et al. 2016)
NA12155	CEU	Utah	Europe	R1a	1K Genomes Project (Poznik et al. 2016)
HG00151	GBR	British in England and Scotland	Europe	R1a	1K Genomes Project (Poznik et al. 2016)
HG00382	FIN	Finland	Europe	R1a	1K Genomes Project (Poznik et al. 2016)
NA11843	CEU	Utah	Europe	R1a	1K Genomes Project (Poznik et al. 2016)
HG00113	GBR	British in England and Scotland	Europe	R1a	1K Genomes Project (Poznik et al. 2016)
HG00114	GBR	British in England and Scotland	Europe	R1a	1K Genomes Project (Poznik et al. 2016)
NA20539	TSI	Toscani in Italy	Europe	R1a	1K Genomes Project (Poznik et al. 2016)
NA20796	TSI	Toscani in Italy	Europe	R1a	1K Genomes Project (Poznik et al. 2016)
HG01617	IBS	Iberian Population in Spain	Europe	R1a	1K Genomes Project (Poznik et al. 2016)
NA20785	TSI	Toscani in Italy	Europe	R1b	1K Genomes Project (Poznik et al. 2016)
HG00148	GBR	British in England and Scotland	Europe	R1b	1K Genomes Project (Poznik et al. 2016)
HG01678	IBS	Iberian Population in Spain	Europe	R1b	1K Genomes Project (Poznik et al. 2016)
NA12827	CEU	Utah	Europe	R1b	1K Genomes Project (Poznik et al. 2016)
NA12842	CEU	Utah	Europe	R1b	1K Genomes Project (Poznik et al. 2016)
NA12872	CEU	Utah	Europe	R1b	1K Genomes Project (Poznik et al. 2016)
HG00260	GBR	British in England and Scotland	Europe	R1b	1K Genomes Project (Poznik et al. 2016)
HG02238	IBS	Iberian Population in Spain	Europe	R1b	1K Genomes Project (Poznik et al. 2016)
HG00155	GBR	British in England and Scotland	Europe	R1b	1K Genomes Project (Poznik et al. 2016)
NA12272	CEU	Utah	Europe	R1b	1K Genomes Project (Poznik et al. 2016)
HG02233	IBS	Iberian Population in Spain	Europe	R1b	1K Genomes Project (Poznik et al. 2016)
HG00265	GBR	British in England and Scotland	Europe	R1b	1K Genomes Project (Poznik et al. 2016)
NA06986	CEU	Utah	Europe	R1b	1K Genomes Project (Poznik et al. 2016)
NA12760	CEU	Utah	Europe	R1b	1K Genomes Project (Poznik et al. 2016)
NA12775	CEU	Utah	Europe	R1b	1K Genomes Project (Poznik et al. 2016)
NA07048	CEU	Utah	Europe	R1b	1K Genomes Project (Poznik et al. 2016)
HG00143	GBR	British in England and Scotland	Europe	R1b	1K Genomes Project (Poznik et al. 2016)
HG00149	GBR	British in England and Scotland	Europe	R1b	1K Genomes Project (Poznik et al. 2016)
HG00251	GBR	British in England and Scotland	Europe	R1b	1K Genomes Project (Poznik et al. 2016)
NA20586	TSI	Toscani in Italy	Europe	R1b	1K Genomes Project (Poznik et al. 2016)
NA20524	TSI	Toscani in Italy	Europe	R1b	1K Genomes Project (Poznik et al. 2016)
HG00157	GBR	British in England and Scotland	Europe	R1b	1K Genomes Project (Poznik et al. 2016)
HG01334	GBR	British in England and Scotland	Europe	R1b	1K Genomes Project (Poznik et al. 2016)
NA20755	TSI	Toscani in Italy	Europe	R1b	1K Genomes Project (Poznik et al. 2016)
NA20783	TSI	Toscani in Italy	Europe	R1b	1K Genomes Project (Poznik et al. 2016)
NA12347	CEU	Utah	Europe	R1b	1K Genomes Project (Poznik et al. 2016)
NA12812	CEU	Utah	Europe	R1b	1K Genomes Project (Poznik et al. 2016)
NA12814	CEU	Utah	Europe	R1b	1K Genomes Project (Poznik et al. 2016)
HG01789	GBR	British in England and Scotland	Europe	R1b	1K Genomes Project (Poznik et al. 2016)
HG01506	IBS	Iberian Population in Spain	Europe	R1b	1K Genomes Project (Poznik et al. 2016)
HG01518	IBS	Iberian Population in Spain	Europe	R1b	1K Genomes Project (Poznik et al. 2016)
HG01606	IBS	Iberian Population in Spain	Europe	R1b	1K Genomes Project (Poznik et al. 2016)
HG01615	IBS	Iberian Population in Spain	Europe	R1b	1K Genomes Project (Poznik et al. 2016)
HG01694	IBS	Iberian Population in Spain	Europe	R1b	1K Genomes Project (Poznik et al. 2016)
HG01705	IBS	Iberian Population in Spain	Europe	R1b	1K Genomes Project (Poznik et al. 2016)
HG01709	IBS	Iberian Population in Spain	Europe	R1b	1K Genomes Project (Poznik et al. 2016)
HG01775	IBS	Iberian Population in Spain	Europe	R1b	1K Genomes Project (Poznik et al. 2016)
HG01783	IBS	Iberian Population in Spain	Europe	R1b	1K Genomes Project (Poznik et al. 2016)
HG01785	IBS	Iberian Population in Spain	Europe	R1b	1K Genomes Project (Poznik et al. 2016)
NA20770	TSI	Toscani in Italy	Europe	R1b	1K Genomes Project (Poznik et al. 2016)
HG00112	GBR	British in England and Scotland	Europe	R1b	1K Genomes Project (Poznik et al. 2016)
NA20519	TSI	Toscani in Italy	Europe	R1b	1K Genomes Project (Poznik et al. 2016)
NA12874	CEU	Utah	Europe	R1b	1K Genomes Project (Poznik et al. 2016)
HG01524	IBS	Iberian Population in Spain	Europe	R1b	1K Genomes Project (Poznik et al. 2016)
HG01700	IBS	Iberian Population in Spain	Europe	R1b	1K Genomes Project (Poznik et al. 2016)
HG01765	IBS	Iberian Population in Spain	Europe	R1b	1K Genomes Project (Poznik et al. 2016)
NA20518	TSI	Toscani in Italy	Europe	R1b	1K Genomes Project (Poznik et al. 2016)
HG01608	IBS	Iberian Population in Spain	Europe	R1b	1K Genomes Project (Poznik et al. 2016)
HG01669	IBS	Iberian Population in Spain	Europe	R1b	1K Genomes Project (Poznik et al. 2016)
HG01603	IBS	Iberian Population in Spain	Europe	R1b	1K Genomes Project (Poznik et al. 2016)
HG02221	IBS	Iberian Population in Spain	Europe	R1b	1K Genomes Project (Poznik et al. 2016)
HG01521	IBS	Iberian Population in Spain	Europe	R1b	1K Genomes Project (Poznik et al. 2016)
NA12716	CEU	Utah	Europe	R1b	1K Genomes Project (Poznik et al. 2016)
HG01791	GBR	British in England and Scotland	Europe	R1b	1K Genomes Project (Poznik et al. 2016)
HG01747	IBS	Iberian Population in Spain	Europe	R1b	1K Genomes Project (Poznik et al. 2016)
HG00141	GBR	British in England and Scotland	Europe	R1b	1K Genomes Project (Poznik et al. 2016)
HG01631	IBS	Iberian Population in Spain	Europe	R1b	1K Genomes Project (Poznik et al. 2016)
NA20752	TSI	Toscani in Italy	Europe	R1b	1K Genomes Project (Poznik et al. 2016)
NA12144	CEU	Utah	Europe	R1b	1K Genomes Project (Poznik et al. 2016)
HG00129	GBR	British in England and Scotland	Europe	R1b	1K Genomes Project (Poznik et al. 2016)
HG00145	GBR	British in England and Scotland	Europe	R1b	1K Genomes Project (Poznik et al. 2016)
NA20512	TSI	Toscani in Italy	Europe	R1b	1K Genomes Project (Poznik et al. 2016)
NA20538	TSI	Toscani in Italy	Europe	R1b	1K Genomes Project (Poznik et al. 2016)
NA20754	TSI	Toscani in Italy	Europe	R1b	1K Genomes Project (Poznik et al. 2016)
NA20792	TSI	Toscani in Italy	Europe	R1b	1K Genomes Project (Poznik et al. 2016)
NA20798	TSI	Toscani in Italy	Europe	R1b	1K Genomes Project (Poznik et al. 2016)
NA20803	TSI	Toscani in Italy	Europe	R1b	1K Genomes Project (Poznik et al. 2016)
NA20806	TSI	Toscani in Italy	Europe	R1b	1K Genomes Project (Poznik et al. 2016)
NA12005	CEU	Utah	Europe	R1b	1K Genomes Project (Poznik et al. 2016)
HG01767	IBS	Iberian Population in Spain	Europe	R1b	1K Genomes Project (Poznik et al. 2016)
NA20515	TSI	Toscani in Italy	Europe	R1b	1K Genomes Project (Poznik et al. 2016)
NA20759	TSI	Toscani in Italy	Europe	R1b	1K Genomes Project (Poznik et al. 2016)
NA07347	CEU	Utah	Europe	R1b	1K Genomes Project (Poznik et al. 2016)
NA11994	CEU	Utah	Europe	R1b	1K Genomes Project (Poznik et al. 2016)
NA12829	CEU	Utah	Europe	R1b	1K Genomes Project (Poznik et al. 2016)
HG00142	GBR	British in England and Scotland	Europe	R1b	1K Genomes Project (Poznik et al. 2016)
HG00244	GBR	British in England and Scotland	Europe	R1b	1K Genomes Project (Poznik et al. 2016)
HG01536	IBS	Iberian Population in Spain	Europe	R1b	1K Genomes Project (Poznik et al. 2016)
HG01777	IBS	Iberian Population in Spain	Europe	R1b	1K Genomes Project (Poznik et al. 2016)
NA20812	TSI	Toscani in Italy	Europe	R1b	1K Genomes Project (Poznik et al. 2016)
HG02219	IBS	Iberian Population in Spain	Europe	R1b	1K Genomes Project (Poznik et al. 2016)
HG02231	IBS	Iberian Population in Spain	Europe	R1b	1K Genomes Project (Poznik et al. 2016)
NA12342	CEU	Utah	Europe	R1b	1K Genomes Project (Poznik et al. 2016)
NA20810	TSI	Toscani in Italy	Europe	R1b	1K Genomes Project (Poznik et al. 2016)
NA20581	TSI	Toscani in Italy	Europe	R1b	1K Genomes Project (Poznik et al. 2016)
NA20814	TSI	Toscani in Italy	Europe	R1b	1K Genomes Project (Poznik et al. 2016)
NA12340	CEU	Utah	Europe	R1b	1K Genomes Project (Poznik et al. 2016)
NA12399	CEU	Utah	Europe	R1b	1K Genomes Project (Poznik et al. 2016)
NA12045	CEU	Utah	Europe	R1b	1K Genomes Project (Poznik et al. 2016)
NA12154	CEU	Utah	Europe	R1b	1K Genomes Project (Poznik et al. 2016)
NA12762	CEU	Utah	Europe	R1b	1K Genomes Project (Poznik et al. 2016)
HG00246	GBR	British in England and Scotland	Europe	R1b	1K Genomes Project (Poznik et al. 2016)
HG00105	GBR	British in England and Scotland	Europe	R1b	1K Genomes Project (Poznik et al. 2016)
NA06984	CEU	Utah	Europe	R1b	1K Genomes Project (Poznik et al. 2016)
HG01500	IBS	Iberian Population in Spain	Europe	R1b	1K Genomes Project (Poznik et al. 2016)
HG01675	IBS	Iberian Population in Spain	Europe	R1b	1K Genomes Project (Poznik et al. 2016)
NA12043	CEU	Utah	Europe	R1b	1K Genomes Project (Poznik et al. 2016)
HG00242	GBR	British in England and Scotland	Europe	R1b	1K Genomes Project (Poznik et al. 2016)
NA11831	CEU	Utah	Europe	R1b	1K Genomes Project (Poznik et al. 2016)
HG00243	GBR	British in England and Scotland	Europe	R1b	1K Genomes Project (Poznik et al. 2016)
NA12889	CEU	Utah	Europe	R1b	1K Genomes Project (Poznik et al. 2016)
HG00138	GBR	British in England and Scotland	Europe	R1b	1K Genomes Project (Poznik et al. 2016)
HG01515	IBS	Iberian Population in Spain	Europe	R1b	1K Genomes Project (Poznik et al. 2016)
NA20532	TSI	Toscani in Italy	Europe	R1b	1K Genomes Project (Poznik et al. 2016)
NA20520	TSI	Toscani in Italy	Europe	T	1K Genomes Project (Poznik et al. 2016)
NA20527	TSI	Toscani in Italy	Europe	T	1K Genomes Project (Poznik et al. 2016)
HG01530	IBS	Iberian Population in Spain	Europe	T	1K Genomes Project (Poznik et al. 2016)
NA20758	TSI	Toscani in Italy	Europe	T	1K Genomes Project (Poznik et al. 2016)
HG03917	BEB	Bengali from Bangladesh	SouthAsia	C2b	1K Genomes Project (Poznik et al. 2016)
HG03593	BEB	Bengali from Bangladesh	SouthAsia	C1b1a1	1K Genomes Project (Poznik et al. 2016)
HG04155	BEB	Bengali from Bangladesh	SouthAsia	C1b1a1	1K Genomes Project (Poznik et al. 2016)
NA20889	GIH	Gujarati Indian from Houston, Texas	SouthAsia	C1b1a1	1K Genomes Project (Poznik et al. 2016)
NA20911	GIH	Gujarati Indian from Houston, Texas	SouthAsia	C1b1a1	1K Genomes Project (Poznik et al. 2016)
NA21091	GIH	Gujarati Indian from Houston, Texas	SouthAsia	C1b1a1	1K Genomes Project (Poznik et al. 2016)
NA21094	GIH	Gujarati Indian from Houston, Texas	SouthAsia	C1b1a1	1K Genomes Project (Poznik et al. 2016)
NA21100	GIH	Gujarati Indian from Houston, Texas	SouthAsia	C1b1a1	1K Genomes Project (Poznik et al. 2016)
NA21117	GIH	Gujarati Indian from Houston, Texas	SouthAsia	C1b1a1	1K Genomes Project (Poznik et al. 2016)
NA21118	GIH	Gujarati Indian from Houston, Texas	SouthAsia	C1b1a1	1K Genomes Project (Poznik et al. 2016)
NA21119	GIH	Gujarati Indian from Houston, Texas	SouthAsia	C1b1a1	1K Genomes Project (Poznik et al. 2016)
NA21123	GIH	Gujarati Indian from Houston, Texas	SouthAsia	C1b1a1	1K Genomes Project (Poznik et al. 2016)
NA21124	GIH	Gujarati Indian from Houston, Texas	SouthAsia	C1b1a1	1K Genomes Project (Poznik et al. 2016)
NA21127	GIH	Gujarati Indian from Houston, Texas	SouthAsia	C1b1a1	1K Genomes Project (Poznik et al. 2016)
HG03850	STU	Sri Lankan Tamil from the UK	SouthAsia	C1b1a1	1K Genomes Project (Poznik et al. 2016)
NA20858	GIH	Gujarati Indian from Houston, Texas	SouthAsia	G1	1K Genomes Project (Poznik et al. 2016)
NA20870	GIH	Gujarati Indian from Houston, Texas	SouthAsia	G1	1K Genomes Project (Poznik et al. 2016)
HG03708	PJL	Punjabi from Lahore, Pakistan, SAS	SouthAsia	G2	1K Genomes Project (Poznik et al. 2016)
HG02681	PJL	Punjabi from Lahore, Pakistan, SAS	SouthAsia	G2	1K Genomes Project (Poznik et al. 2016)
HG02687	PJL	Punjabi from Lahore, Pakistan, SAS	SouthAsia	G2	1K Genomes Project (Poznik et al. 2016)
HG02789	PJL	Punjabi from Lahore, Pakistan, SAS	SouthAsia	G2	1K Genomes Project (Poznik et al. 2016)
HG03812	BEB	Bengali from Bangladesh	SouthAsia	H1a1	1K Genomes Project (Poznik et al. 2016)
HG04146	BEB	Bengali from Bangladesh	SouthAsia	H1a1	1K Genomes Project (Poznik et al. 2016)
HG04185	BEB	Bengali from Bangladesh	SouthAsia	H1a1	1K Genomes Project (Poznik et al. 2016)
HG03809	BEB	Bengali from Bangladesh	SouthAsia	H1a2	1K Genomes Project (Poznik et al. 2016)
NA21087	GIH	Gujarati Indian from Houston, Texas	SouthAsia	H1a1	1K Genomes Project (Poznik et al. 2016)
HG03991	STU	Sri Lankan Tamil from the UK	SouthAsia	H1a2	1K Genomes Project (Poznik et al. 2016)
HG03870	ITU	Indian Telugu from the UK	SouthAsia	H3	1K Genomes Project (Poznik et al. 2016)
HG04033	STU	Sri Lankan Tamil from the UK	SouthAsia	H3	1K Genomes Project (Poznik et al. 2016)
HG03009	BEB	Bengali from Bangladesh	SouthAsia	H1a1	1K Genomes Project (Poznik et al. 2016)
NA20871	GIH	Gujarati Indian from Houston, Texas	SouthAsia	H1a1	1K Genomes Project (Poznik et al. 2016)
NA20901	GIH	Gujarati Indian from Houston, Texas	SouthAsia	H1a1	1K Genomes Project (Poznik et al. 2016)
NA21099	GIH	Gujarati Indian from Houston, Texas	SouthAsia	H1a1	1K Genomes Project (Poznik et al. 2016)
NA21107	GIH	Gujarati Indian from Houston, Texas	SouthAsia	H1a1	1K Genomes Project (Poznik et al. 2016)
NA21113	GIH	Gujarati Indian from Houston, Texas	SouthAsia	H1a1	1K Genomes Project (Poznik et al. 2016)
HG04002	ITU	Indian Telugu from the UK	SouthAsia	H1a1	1K Genomes Project (Poznik et al. 2016)
HG04060	ITU	Indian Telugu from the UK	SouthAsia	H1a1	1K Genomes Project (Poznik et al. 2016)
HG04061	ITU	Indian Telugu from the UK	SouthAsia	H1a1	1K Genomes Project (Poznik et al. 2016)
HG01583	PJL	Punjabi from Lahore, Pakistan, SAS	SouthAsia	H1a1	1K Genomes Project (Poznik et al. 2016)
HG03646	STU	Sri Lankan Tamil from the UK	SouthAsia	H1a1	1K Genomes Project (Poznik et al. 2016)
HG03738	STU	Sri Lankan Tamil from the UK	SouthAsia	H1a1	1K Genomes Project (Poznik et al. 2016)
HG03745	STU	Sri Lankan Tamil from the UK	SouthAsia	H1a1	1K Genomes Project (Poznik et al. 2016)
HG03985	STU	Sri Lankan Tamil from the UK	SouthAsia	H1a1	1K Genomes Project (Poznik et al. 2016)
HG03846	STU	Sri Lankan Tamil from the UK	SouthAsia	H1a1	1K Genomes Project (Poznik et al. 2016)
HG03767	PJL	Punjabi from Lahore, Pakistan, SAS	SouthAsia	J1	1K Genomes Project (Poznik et al. 2016)
HG01589	PJL	Punjabi from Lahore, Pakistan, SAS	SouthAsia	J2	1K Genomes Project (Poznik et al. 2016)
HG02774	PJL	Punjabi from Lahore, Pakistan, SAS	SouthAsia	J2	1K Genomes Project (Poznik et al. 2016)
HG03012	BEB	Bengali from Bangladesh	SouthAsia	J2	1K Genomes Project (Poznik et al. 2016)
HG03615	BEB	Bengali from Bangladesh	SouthAsia	J2	1K Genomes Project (Poznik et al. 2016)
HG03905	BEB	Bengali from Bangladesh	SouthAsia	J2	1K Genomes Project (Poznik et al. 2016)
NA20884	GIH	Gujarati Indian from Houston, Texas	SouthAsia	J2	1K Genomes Project (Poznik et al. 2016)
NA21090	GIH	Gujarati Indian from Houston, Texas	SouthAsia	J2	1K Genomes Project (Poznik et al. 2016)
HG02493	PJL	Punjabi from Lahore, Pakistan, SAS	SouthAsia	J2	1K Genomes Project (Poznik et al. 2016)
HG02733	PJL	Punjabi from Lahore, Pakistan, SAS	SouthAsia	J2	1K Genomes Project (Poznik et al. 2016)
HG03018	PJL	Punjabi from Lahore, Pakistan, SAS	SouthAsia	J2	1K Genomes Project (Poznik et al. 2016)
HG03021	PJL	Punjabi from Lahore, Pakistan, SAS	SouthAsia	J2	1K Genomes Project (Poznik et al. 2016)
HG03660	PJL	Punjabi from Lahore, Pakistan, SAS	SouthAsia	J2	1K Genomes Project (Poznik et al. 2016)
HG04003	STU	Sri Lankan Tamil from the UK	SouthAsia	J2	1K Genomes Project (Poznik et al. 2016)
HG04107	STU	Sri Lankan Tamil from the UK	SouthAsia	J2	1K Genomes Project (Poznik et al. 2016)
HG02490	PJL	Punjabi from Lahore, Pakistan, SAS	SouthAsia	J2	1K Genomes Project (Poznik et al. 2016)
HG02651	PJL	Punjabi from Lahore, Pakistan, SAS	SouthAsia	J2	1K Genomes Project (Poznik et al. 2016)
HG03693	STU	Sri Lankan Tamil from the UK	SouthAsia	J2	1K Genomes Project (Poznik et al. 2016)
HG03854	STU	Sri Lankan Tamil from the UK	SouthAsia	J2	1K Genomes Project (Poznik et al. 2016)
NA21130	GIH	Gujarati Indian from Houston, Texas	SouthAsia	J2	1K Genomes Project (Poznik et al. 2016)
HG03237	PJL	Punjabi from Lahore, Pakistan, SAS	SouthAsia	J2	1K Genomes Project (Poznik et al. 2016)
HG03851	STU	Sri Lankan Tamil from the UK	SouthAsia	J2	1K Genomes Project (Poznik et al. 2016)
HG03006	BEB	Bengali from Bangladesh	SouthAsia	J2	1K Genomes Project (Poznik et al. 2016)
HG03908	BEB	Bengali from Bangladesh	SouthAsia	J2	1K Genomes Project (Poznik et al. 2016)
NA20885	GIH	Gujarati Indian from Houston, Texas	SouthAsia	J2	1K Genomes Project (Poznik et al. 2016)
NA20905	GIH	Gujarati Indian from Houston, Texas	SouthAsia	J2	1K Genomes Project (Poznik et al. 2016)
HG03785	ITU	Indian Telugu from the UK	SouthAsia	J2	1K Genomes Project (Poznik et al. 2016)
HG03969	ITU	Indian Telugu from the UK	SouthAsia	J2	1K Genomes Project (Poznik et al. 2016)
HG03976	ITU	Indian Telugu from the UK	SouthAsia	J2	1K Genomes Project (Poznik et al. 2016)
HG04239	ITU	Indian Telugu from the UK	SouthAsia	J2	1K Genomes Project (Poznik et al. 2016)
HG02690	PJL	Punjabi from Lahore, Pakistan, SAS	SouthAsia	J2	1K Genomes Project (Poznik et al. 2016)
HG03696	STU	Sri Lankan Tamil from the UK	SouthAsia	J2	1K Genomes Project (Poznik et al. 2016)
HG03998	STU	Sri Lankan Tamil from the UK	SouthAsia	J2	1K Genomes Project (Poznik et al. 2016)
HG04210	STU	Sri Lankan Tamil from the UK	SouthAsia	J2	1K Genomes Project (Poznik et al. 2016)
HG03920	BEB	Bengali from Bangladesh	SouthAsia	L1	1K Genomes Project (Poznik et al. 2016)
NA20861	GIH	Gujarati Indian from Houston, Texas	SouthAsia	L1	1K Genomes Project (Poznik et al. 2016)
NA20867	GIH	Gujarati Indian from Houston, Texas	SouthAsia	L1	1K Genomes Project (Poznik et al. 2016)
NA21109	GIH	Gujarati Indian from Houston, Texas	SouthAsia	L1	1K Genomes Project (Poznik et al. 2016)
NA21128	GIH	Gujarati Indian from Houston, Texas	SouthAsia	L1	1K Genomes Project (Poznik et al. 2016)
NA21135	GIH	Gujarati Indian from Houston, Texas	SouthAsia	L1	1K Genomes Project (Poznik et al. 2016)
HG03786	ITU	Indian Telugu from the UK	SouthAsia	L1	1K Genomes Project (Poznik et al. 2016)
HG03788	ITU	Indian Telugu from the UK	SouthAsia	L1	1K Genomes Project (Poznik et al. 2016)
HG03875	ITU	Indian Telugu from the UK	SouthAsia	L1	1K Genomes Project (Poznik et al. 2016)
HG03971	ITU	Indian Telugu from the UK	SouthAsia	L1	1K Genomes Project (Poznik et al. 2016)
HG04080	ITU	Indian Telugu from the UK	SouthAsia	L1	1K Genomes Project (Poznik et al. 2016)
HG04093	ITU	Indian Telugu from the UK	SouthAsia	L1	1K Genomes Project (Poznik et al. 2016)
HG02654	PJL	Punjabi from Lahore, Pakistan, SAS	SouthAsia	L1	1K Genomes Project (Poznik et al. 2016)
HG02792	PJL	Punjabi from Lahore, Pakistan, SAS	SouthAsia	L1	1K Genomes Project (Poznik et al. 2016)
HG03686	STU	Sri Lankan Tamil from the UK	SouthAsia	L1	1K Genomes Project (Poznik et al. 2016)
HG03746	STU	Sri Lankan Tamil from the UK	SouthAsia	L1	1K Genomes Project (Poznik et al. 2016)
HG03885	STU	Sri Lankan Tamil from the UK	SouthAsia	L1	1K Genomes Project (Poznik et al. 2016)
HG03953	STU	Sri Lankan Tamil from the UK	SouthAsia	L1	1K Genomes Project (Poznik et al. 2016)
HG03990	STU	Sri Lankan Tamil from the UK	SouthAsia	L1	1K Genomes Project (Poznik et al. 2016)
HG04100	STU	Sri Lankan Tamil from the UK	SouthAsia	L1	1K Genomes Project (Poznik et al. 2016)
HG03821	BEB	Bengali from Bangladesh	SouthAsia	L1	1K Genomes Project (Poznik et al. 2016)
HG03790	ITU	Indian Telugu from the UK	SouthAsia	L1	1K Genomes Project (Poznik et al. 2016)
HG04094	ITU	Indian Telugu from the UK	SouthAsia	L1	1K Genomes Project (Poznik et al. 2016)
HG03672	STU	Sri Lankan Tamil from the UK	SouthAsia	L1	1K Genomes Project (Poznik et al. 2016)
HG03695	STU	Sri Lankan Tamil from the UK	SouthAsia	L1	1K Genomes Project (Poznik et al. 2016)
HG03753	STU	Sri Lankan Tamil from the UK	SouthAsia	L1	1K Genomes Project (Poznik et al. 2016)
HG03900	STU	Sri Lankan Tamil from the UK	SouthAsia	L1	1K Genomes Project (Poznik et al. 2016)
HG04015	ITU	Indian Telugu from the UK	SouthAsia	N	1K Genomes Project (Poznik et al. 2016)
HG03742	ITU	Indian Telugu from the UK	SouthAsia	excluded from current study	1K Genomes Project (Poznik et al. 2016)
HG04140	BEB	Bengali from Bangladesh	SouthAsia	O1	1K Genomes Project (Poznik et al. 2016)
HG04173	BEB	Bengali from Bangladesh	SouthAsia	O1	1K Genomes Project (Poznik et al. 2016)
HG03830	BEB	Bengali from Bangladesh	SouthAsia	O2	1K Genomes Project (Poznik et al. 2016)
HG04134	BEB	Bengali from Bangladesh	SouthAsia	O2	1K Genomes Project (Poznik et al. 2016)
HG02696	PJL	Punjabi from Lahore, Pakistan, SAS	SouthAsia	Q1	1K Genomes Project (Poznik et al. 2016)
HG03681	STU	Sri Lankan Tamil from the UK	SouthAsia	Q1	1K Genomes Project (Poznik et al. 2016)
HG03943	STU	Sri Lankan Tamil from the UK	SouthAsia	Q1	1K Genomes Project (Poznik et al. 2016)
HG03914	BEB	Bengali from Bangladesh	SouthAsia	Q2	1K Genomes Project (Poznik et al. 2016)
HG03864	ITU	Indian Telugu from the UK	SouthAsia	Q2	1K Genomes Project (Poznik et al. 2016)
HG03652	PJL	Punjabi from Lahore, Pakistan, SAS	SouthAsia	Q2	1K Genomes Project (Poznik et al. 2016)
HG03926	BEB	Bengali from Bangladesh	SouthAsia	R1a	1K Genomes Project (Poznik et al. 2016)
HG04194	BEB	Bengali from Bangladesh	SouthAsia	R1a	1K Genomes Project (Poznik et al. 2016)
NA20897	GIH	Gujarati Indian from Houston, Texas	SouthAsia	R1a	1K Genomes Project (Poznik et al. 2016)
HG02603	PJL	Punjabi from Lahore, Pakistan, SAS	SouthAsia	R1a	1K Genomes Project (Poznik et al. 2016)
HG02699	PJL	Punjabi from Lahore, Pakistan, SAS	SouthAsia	R1a	1K Genomes Project (Poznik et al. 2016)
HG03629	PJL	Punjabi from Lahore, Pakistan, SAS	SouthAsia	R1a	1K Genomes Project (Poznik et al. 2016)
HG03705	PJL	Punjabi from Lahore, Pakistan, SAS	SouthAsia	R1a	1K Genomes Project (Poznik et al. 2016)
HG03744	STU	Sri Lankan Tamil from the UK	SouthAsia	R1a	1K Genomes Project (Poznik et al. 2016)
HG03750	STU	Sri Lankan Tamil from the UK	SouthAsia	R1a	1K Genomes Project (Poznik et al. 2016)
HG03585	BEB	Bengali from Bangladesh	SouthAsia	R1a	1K Genomes Project (Poznik et al. 2016)
HG03603	BEB	Bengali from Bangladesh	SouthAsia	R1a	1K Genomes Project (Poznik et al. 2016)
HG03803	BEB	Bengali from Bangladesh	SouthAsia	R1a	1K Genomes Project (Poznik et al. 2016)
HG03833	BEB	Bengali from Bangladesh	SouthAsia	R1a	1K Genomes Project (Poznik et al. 2016)
HG03911	BEB	Bengali from Bangladesh	SouthAsia	R1a	1K Genomes Project (Poznik et al. 2016)
NA20852	GIH	Gujarati Indian from Houston, Texas	SouthAsia	R1a	1K Genomes Project (Poznik et al. 2016)
NA20890	GIH	Gujarati Indian from Houston, Texas	SouthAsia	R1a	1K Genomes Project (Poznik et al. 2016)
NA20898	GIH	Gujarati Indian from Houston, Texas	SouthAsia	R1a	1K Genomes Project (Poznik et al. 2016)
NA20904	GIH	Gujarati Indian from Houston, Texas	SouthAsia	R1a	1K Genomes Project (Poznik et al. 2016)
NA21098	GIH	Gujarati Indian from Houston, Texas	SouthAsia	R1a	1K Genomes Project (Poznik et al. 2016)
NA21104	GIH	Gujarati Indian from Houston, Texas	SouthAsia	R1a	1K Genomes Project (Poznik et al. 2016)
HG03713	ITU	Indian Telugu from the UK	SouthAsia	R1a	1K Genomes Project (Poznik et al. 2016)
HG03715	ITU	Indian Telugu from the UK	SouthAsia	R1a	1K Genomes Project (Poznik et al. 2016)
HG03775	ITU	Indian Telugu from the UK	SouthAsia	R1a	1K Genomes Project (Poznik et al. 2016)
HG03866	ITU	Indian Telugu from the UK	SouthAsia	R1a	1K Genomes Project (Poznik et al. 2016)
HG03871	ITU	Indian Telugu from the UK	SouthAsia	R1a	1K Genomes Project (Poznik et al. 2016)
HG04017	ITU	Indian Telugu from the UK	SouthAsia	R1a	1K Genomes Project (Poznik et al. 2016)
HG04098	ITU	Indian Telugu from the UK	SouthAsia	R1a	1K Genomes Project (Poznik et al. 2016)
HG02597	PJL	Punjabi from Lahore, Pakistan, SAS	SouthAsia	R1a	1K Genomes Project (Poznik et al. 2016)
HG02780	PJL	Punjabi from Lahore, Pakistan, SAS	SouthAsia	R1a	1K Genomes Project (Poznik et al. 2016)
HG03685	STU	Sri Lankan Tamil from the UK	SouthAsia	R1a	1K Genomes Project (Poznik et al. 2016)
HG03711	STU	Sri Lankan Tamil from the UK	SouthAsia	R1a	1K Genomes Project (Poznik et al. 2016)
HG03899	STU	Sri Lankan Tamil from the UK	SouthAsia	R1a	1K Genomes Project (Poznik et al. 2016)
HG04039	STU	Sri Lankan Tamil from the UK	SouthAsia	R1a	1K Genomes Project (Poznik et al. 2016)
HG04229	STU	Sri Lankan Tamil from the UK	SouthAsia	R1a	1K Genomes Project (Poznik et al. 2016)
HG03902	BEB	Bengali from Bangladesh	SouthAsia	R1a	1K Genomes Project (Poznik et al. 2016)
NA20846	GIH	Gujarati Indian from Houston, Texas	SouthAsia	R1a	1K Genomes Project (Poznik et al. 2016)
NA20850	GIH	Gujarati Indian from Houston, Texas	SouthAsia	R1a	1K Genomes Project (Poznik et al. 2016)
NA20891	GIH	Gujarati Indian from Houston, Texas	SouthAsia	R1a	1K Genomes Project (Poznik et al. 2016)
NA21095	GIH	Gujarati Indian from Houston, Texas	SouthAsia	R1a	1K Genomes Project (Poznik et al. 2016)
NA21114	GIH	Gujarati Indian from Houston, Texas	SouthAsia	R1a	1K Genomes Project (Poznik et al. 2016)
NA21115	GIH	Gujarati Indian from Houston, Texas	SouthAsia	R1a	1K Genomes Project (Poznik et al. 2016)
NA21129	GIH	Gujarati Indian from Houston, Texas	SouthAsia	R1a	1K Genomes Project (Poznik et al. 2016)
HG03720	ITU	Indian Telugu from the UK	SouthAsia	R1a	1K Genomes Project (Poznik et al. 2016)
HG03779	ITU	Indian Telugu from the UK	SouthAsia	R1a	1K Genomes Project (Poznik et al. 2016)
HG04219	ITU	Indian Telugu from the UK	SouthAsia	R1a	1K Genomes Project (Poznik et al. 2016)
HG02600	PJL	Punjabi from Lahore, Pakistan, SAS	SouthAsia	R1a	1K Genomes Project (Poznik et al. 2016)
HG02648	PJL	Punjabi from Lahore, Pakistan, SAS	SouthAsia	R1a	1K Genomes Project (Poznik et al. 2016)
HG02727	PJL	Punjabi from Lahore, Pakistan, SAS	SouthAsia	R1a	1K Genomes Project (Poznik et al. 2016)
HG02736	PJL	Punjabi from Lahore, Pakistan, SAS	SouthAsia	R1a	1K Genomes Project (Poznik et al. 2016)
HG03234	PJL	Punjabi from Lahore, Pakistan, SAS	SouthAsia	R1a	1K Genomes Project (Poznik et al. 2016)
HG03490	PJL	Punjabi from Lahore, Pakistan, SAS	SouthAsia	R1a	1K Genomes Project (Poznik et al. 2016)
HG03624	PJL	Punjabi from Lahore, Pakistan, SAS	SouthAsia	R1a	1K Genomes Project (Poznik et al. 2016)
HG03649	PJL	Punjabi from Lahore, Pakistan, SAS	SouthAsia	R1a	1K Genomes Project (Poznik et al. 2016)
HG03663	PJL	Punjabi from Lahore, Pakistan, SAS	SouthAsia	R1a	1K Genomes Project (Poznik et al. 2016)
HG03667	PJL	Punjabi from Lahore, Pakistan, SAS	SouthAsia	R1a	1K Genomes Project (Poznik et al. 2016)
HG03679	STU	Sri Lankan Tamil from the UK	SouthAsia	R1a	1K Genomes Project (Poznik et al. 2016)
HG03694	STU	Sri Lankan Tamil from the UK	SouthAsia	R1a	1K Genomes Project (Poznik et al. 2016)
HG03896	STU	Sri Lankan Tamil from the UK	SouthAsia	R1a	1K Genomes Project (Poznik et al. 2016)
HG04131	BEB	Bengali from Bangladesh	SouthAsia	R1a	1K Genomes Project (Poznik et al. 2016)
NA20864	GIH	Gujarati Indian from Houston, Texas	SouthAsia	R1a	1K Genomes Project (Poznik et al. 2016)
NA21092	GIH	Gujarati Indian from Houston, Texas	SouthAsia	R1a	1K Genomes Project (Poznik et al. 2016)
HG03960	ITU	Indian Telugu from the UK	SouthAsia	R1a	1K Genomes Project (Poznik et al. 2016)
HG03963	ITU	Indian Telugu from the UK	SouthAsia	R1a	1K Genomes Project (Poznik et al. 2016)
HG04019	ITU	Indian Telugu from the UK	SouthAsia	R1a	1K Genomes Project (Poznik et al. 2016)
HG04020	ITU	Indian Telugu from the UK	SouthAsia	R1a	1K Genomes Project (Poznik et al. 2016)
HG04023	ITU	Indian Telugu from the UK	SouthAsia	R1a	1K Genomes Project (Poznik et al. 2016)
HG04096	ITU	Indian Telugu from the UK	SouthAsia	R1a	1K Genomes Project (Poznik et al. 2016)
HG03636	PJL	Punjabi from Lahore, Pakistan, SAS	SouthAsia	R1a	1K Genomes Project (Poznik et al. 2016)
HG03687	STU	Sri Lankan Tamil from the UK	SouthAsia	R1a	1K Genomes Project (Poznik et al. 2016)
HG03740	STU	Sri Lankan Tamil from the UK	SouthAsia	R1a	1K Genomes Project (Poznik et al. 2016)
HG03743	STU	Sri Lankan Tamil from the UK	SouthAsia	R1a	1K Genomes Project (Poznik et al. 2016)
HG03887	STU	Sri Lankan Tamil from the UK	SouthAsia	R1a	1K Genomes Project (Poznik et al. 2016)
HG03999	STU	Sri Lankan Tamil from the UK	SouthAsia	R1a	1K Genomes Project (Poznik et al. 2016)
NA20866	GIH	Gujarati Indian from Houston, Texas	SouthAsia	R1b	1K Genomes Project (Poznik et al. 2016)
HG04152	BEB	Bengali from Bangladesh	SouthAsia	R2	1K Genomes Project (Poznik et al. 2016)
HG04158	BEB	Bengali from Bangladesh	SouthAsia	R2	1K Genomes Project (Poznik et al. 2016)
NA20845	GIH	Gujarati Indian from Houston, Texas	SouthAsia	R2	1K Genomes Project (Poznik et al. 2016)
NA20887	GIH	Gujarati Indian from Houston, Texas	SouthAsia	R2	1K Genomes Project (Poznik et al. 2016)
NA20895	GIH	Gujarati Indian from Houston, Texas	SouthAsia	R2	1K Genomes Project (Poznik et al. 2016)
NA20903	GIH	Gujarati Indian from Houston, Texas	SouthAsia	R2	1K Genomes Project (Poznik et al. 2016)
NA21105	GIH	Gujarati Indian from Houston, Texas	SouthAsia	R2	1K Genomes Project (Poznik et al. 2016)
HG03718	ITU	Indian Telugu from the UK	SouthAsia	R2	1K Genomes Project (Poznik et al. 2016)
HG03727	ITU	Indian Telugu from the UK	SouthAsia	R2	1K Genomes Project (Poznik et al. 2016)
HG03729	ITU	Indian Telugu from the UK	SouthAsia	R2	1K Genomes Project (Poznik et al. 2016)
HG03771	ITU	Indian Telugu from the UK	SouthAsia	R2	1K Genomes Project (Poznik et al. 2016)
HG03869	ITU	Indian Telugu from the UK	SouthAsia	R2	1K Genomes Project (Poznik et al. 2016)
HG03967	ITU	Indian Telugu from the UK	SouthAsia	R2	1K Genomes Project (Poznik et al. 2016)
HG03974	ITU	Indian Telugu from the UK	SouthAsia	R2	1K Genomes Project (Poznik et al. 2016)
HG03978	ITU	Indian Telugu from the UK	SouthAsia	R2	1K Genomes Project (Poznik et al. 2016)
HG04056	ITU	Indian Telugu from the UK	SouthAsia	R2	1K Genomes Project (Poznik et al. 2016)
HG04225	ITU	Indian Telugu from the UK	SouthAsia	R2	1K Genomes Project (Poznik et al. 2016)
HG01586	PJL	Punjabi from Lahore, Pakistan, SAS	SouthAsia	R2	1K Genomes Project (Poznik et al. 2016)
HG02657	PJL	Punjabi from Lahore, Pakistan, SAS	SouthAsia	R2	1K Genomes Project (Poznik et al. 2016)
HG03702	PJL	Punjabi from Lahore, Pakistan, SAS	SouthAsia	R2	1K Genomes Project (Poznik et al. 2016)
HG03691	STU	Sri Lankan Tamil from the UK	SouthAsia	R2	1K Genomes Project (Poznik et al. 2016)
HG03844	STU	Sri Lankan Tamil from the UK	SouthAsia	R2	1K Genomes Project (Poznik et al. 2016)
HG03856	STU	Sri Lankan Tamil from the UK	SouthAsia	R2	1K Genomes Project (Poznik et al. 2016)
HG04182	BEB	Bengali from Bangladesh	SouthAsia	R2	1K Genomes Project (Poznik et al. 2016)
HG03773	ITU	Indian Telugu from the UK	SouthAsia	R2	1K Genomes Project (Poznik et al. 2016)
HG04022	ITU	Indian Telugu from the UK	SouthAsia	R2	1K Genomes Project (Poznik et al. 2016)
HG02660	PJL	Punjabi from Lahore, Pakistan, SAS	SouthAsia	R2	1K Genomes Project (Poznik et al. 2016)
HG03015	PJL	Punjabi from Lahore, Pakistan, SAS	SouthAsia	R2	1K Genomes Project (Poznik et al. 2016)
HG02141	KHV	Kinh Vietnamese	SouthEastAsia	C2b	1K Genomes Project (Poznik et al. 2016)
HG02138	KHV	Kinh Vietnamese	SouthEastAsia	N	1K Genomes Project (Poznik et al. 2016)
HG02026	KHV	Kinh Vietnamese	SouthEastAsia	N1	1K Genomes Project (Poznik et al. 2016)
HG02079	KHV	Kinh Vietnamese	SouthEastAsia	O1	1K Genomes Project (Poznik et al. 2016)
HG01844	KHV	Kinh Vietnamese	SouthEastAsia	O1	1K Genomes Project (Poznik et al. 2016)
HG01865	KHV	Kinh Vietnamese	SouthEastAsia	O1	1K Genomes Project (Poznik et al. 2016)
HG01867	KHV	Kinh Vietnamese	SouthEastAsia	O1	1K Genomes Project (Poznik et al. 2016)
HG02061	KHV	Kinh Vietnamese	SouthEastAsia	O1	1K Genomes Project (Poznik et al. 2016)
HG02064	KHV	Kinh Vietnamese	SouthEastAsia	O1	1K Genomes Project (Poznik et al. 2016)
HG01840	KHV	Kinh Vietnamese	SouthEastAsia	O1	1K Genomes Project (Poznik et al. 2016)
HG01842	KHV	Kinh Vietnamese	SouthEastAsia	O1	1K Genomes Project (Poznik et al. 2016)
HG01849	KHV	Kinh Vietnamese	SouthEastAsia	O1	1K Genomes Project (Poznik et al. 2016)
HG01873	KHV	Kinh Vietnamese	SouthEastAsia	O1	1K Genomes Project (Poznik et al. 2016)
HG02020	KHV	Kinh Vietnamese	SouthEastAsia	O1	1K Genomes Project (Poznik et al. 2016)
HG02032	KHV	Kinh Vietnamese	SouthEastAsia	O1	1K Genomes Project (Poznik et al. 2016)
HG02085	KHV	Kinh Vietnamese	SouthEastAsia	O1	1K Genomes Project (Poznik et al. 2016)
HG02088	KHV	Kinh Vietnamese	SouthEastAsia	O2	1K Genomes Project (Poznik et al. 2016)
HG02029	KHV	Kinh Vietnamese	SouthEastAsia	O2	1K Genomes Project (Poznik et al. 2016)
HG02067	KHV	Kinh Vietnamese	SouthEastAsia	O2	1K Genomes Project (Poznik et al. 2016)
HG01596	KHV	Kinh Vietnamese	SouthEastAsia	O2	1K Genomes Project (Poznik et al. 2016)
HG02047	KHV	Kinh Vietnamese	SouthEastAsia	O2	1K Genomes Project (Poznik et al. 2016)
HG02128	KHV	Kinh Vietnamese	SouthEastAsia	O2	1K Genomes Project (Poznik et al. 2016)
HG01861	KHV	Kinh Vietnamese	SouthEastAsia	O2	1K Genomes Project (Poznik et al. 2016)
HG02023	KHV	Kinh Vietnamese	SouthEastAsia	O2	1K Genomes Project (Poznik et al. 2016)
HG02035	KHV	Kinh Vietnamese	SouthEastAsia	O2	1K Genomes Project (Poznik et al. 2016)
HG02137	KHV	Kinh Vietnamese	SouthEastAsia	O2	1K Genomes Project (Poznik et al. 2016)
HG01860	KHV	Kinh Vietnamese	SouthEastAsia	O2	1K Genomes Project (Poznik et al. 2016)
HG01864	KHV	Kinh Vietnamese	SouthEastAsia	O2	1K Genomes Project (Poznik et al. 2016)
HG02050	KHV	Kinh Vietnamese	SouthEastAsia	O2	1K Genomes Project (Poznik et al. 2016)
HG02058	KHV	Kinh Vietnamese	SouthEastAsia	O2	1K Genomes Project (Poznik et al. 2016)
HG01852	KHV	Kinh Vietnamese	SouthEastAsia	O2	1K Genomes Project (Poznik et al. 2016)
HG01866	KHV	Kinh Vietnamese	SouthEastAsia	O2	1K Genomes Project (Poznik et al. 2016)
HG02082	KHV	Kinh Vietnamese	SouthEastAsia	O2	1K Genomes Project (Poznik et al. 2016)
HG02122	KHV	Kinh Vietnamese	SouthEastAsia	O2	1K Genomes Project (Poznik et al. 2016)
HG01872	KHV	Kinh Vietnamese	SouthEastAsia	O2	1K Genomes Project (Poznik et al. 2016)
HG02116	KHV	Kinh Vietnamese	SouthEastAsia	Q1	1K Genomes Project (Poznik et al. 2016)
HG02134	KHV	Kinh Vietnamese	SouthEastAsia	Q1	1K Genomes Project (Poznik et al. 2016)
SSM018	Malays	Singapore	SouthEastAsia	C1b1a1	Wong et al. 2013
SSM084	Malays	Singapore	SouthEastAsia	C1b1a1	Wong et al. 2013
SSM099	Malays	Singapore	SouthEastAsia	C1b3a	Wong et al. 2013
SSM021	Malays	Singapore	SouthEastAsia	J1	Wong et al. 2013
SSM079	Malays	Singapore	SouthEastAsia	J2	Wong et al. 2013
SSM082	Malays	Singapore	SouthEastAsia	J2	Wong et al. 2013
SSM016	Malays	Singapore	SouthEastAsia	excluded	Wong et al. 2013
SSM017	Malays	Singapore	SouthEastAsia	O1	Wong et al. 2013
SSM055	Malays	Singapore	SouthEastAsia	O1	Wong et al. 2013
SSM083	Malays	Singapore	SouthEastAsia	O1	Wong et al. 2013
SSM090	Malays	Singapore	SouthEastAsia	O1	Wong et al. 2013
SSM091	Malays	Singapore	SouthEastAsia	O1	Wong et al. 2013
SSM092	Malays	Singapore	SouthEastAsia	O1	Wong et al. 2013
SSM031	Malays	Singapore	SouthEastAsia	O1	Wong et al. 2013
SSM074	Malays	Singapore	SouthEastAsia	O1	Wong et al. 2013
SSM081	Malays	Singapore	SouthEastAsia	O1	Wong et al. 2013
SSM100	Malays	Singapore	SouthEastAsia	O1	Wong et al. 2013
SSM008	Malays	Singapore	SouthEastAsia	O1	Wong et al. 2013
SSM024	Malays	Singapore	SouthEastAsia	O1	Wong et al. 2013
SSM034	Malays	Singapore	SouthEastAsia	O1	Wong et al. 2013
SSM042	Malays	Singapore	SouthEastAsia	O1	Wong et al. 2013
SSM077	Malays	Singapore	SouthEastAsia	O1	Wong et al. 2013
SSM080	Malays	Singapore	SouthEastAsia	O1	Wong et al. 2013
SSM089	Malays	Singapore	SouthEastAsia	O1	Wong et al. 2013
SSM062	Malays	Singapore	SouthEastAsia	O1	Wong et al. 2013
SSM027	Malays	Singapore	SouthEastAsia	O1	Wong et al. 2013
SSM037	Malays	Singapore	SouthEastAsia	O1	Wong et al. 2013
SSM058	Malays	Singapore	SouthEastAsia	O1	Wong et al. 2013
SSM085	Malays	Singapore	SouthEastAsia	O1	Wong et al. 2013
SSM088	Malays	Singapore	SouthEastAsia	O1	Wong et al. 2013
SSM094	Malays	Singapore	SouthEastAsia	O1	Wong et al. 2013
SSM095	Malays	Singapore	SouthEastAsia	O1	Wong et al. 2013
SSM096	Malays	Singapore	SouthEastAsia	O1	Wong et al. 2013
SSM003	Malays	Singapore	SouthEastAsia	O2	Wong et al. 2013
SSM032	Malays	Singapore	SouthEastAsia	O2	Wong et al. 2013
SSM046	Malays	Singapore	SouthEastAsia	O2	Wong et al. 2013
SSM067	Malays	Singapore	SouthEastAsia	O2	Wong et al. 2013
SSM030	Malays	Singapore	SouthEastAsia	O2	Wong et al. 2013
SSM075	Malays	Singapore	SouthEastAsia	O2	Wong et al. 2013
SSM076	Malays	Singapore	SouthEastAsia	O2	Wong et al. 2013
SSM078	Malays	Singapore	SouthEastAsia	O2	Wong et al. 2013
SSM098	Malays	Singapore	SouthEastAsia	O2	Wong et al. 2013
SSM050	Malays	Singapore	SouthEastAsia	P	Wong et al. 2013
SSM097	Malays	Singapore	SouthEastAsia	P	Wong et al. 2013
SSM093	Malays	Singapore	SouthEastAsia	R2	Wong et al. 2013
SSM053	Malays	Singapore	SouthEastAsia	S1a1b	Wong et al. 2013

## Sheet: Suppl5
Supplementary table 5. Summary of included populations
Population	Country/Region	Geographic region used	Population size	Merged group for the maps	Sample size of the merged group	Lat	Long
Aboriginal Australian	Australia	Oceania	1	not merged	1	-17.9614	122.236
Aboriginal Australian	Australia	Oceania	1	not merged	1	-17.6742	141.075
Aboriginal Australian	Australia	Oceania	1	not merged	1	-17.2661	145.486
Aboriginal Australian	Australia	Oceania	1	not merged	1	-13	143
Aboriginal Australian	Australia	Oceania	1	not merged	1	-27.4698	153.025
Aboriginal Australian	Australia	Oceania	1	not merged	1	-21.5921	121.524
Aboriginal Australian	Australia	Oceania	1	not merged	1	-20.6976	139.485
Aboriginal Australian	Australia	Oceania	1	not merged	1	-16.8167	145.633
Armenian	Armenia	Cent/WestAsia	1	not merged	1	39.815	46.752
Armenian	Armenia	Cent/WestAsia	1	not merged	1	40.605	43.101
Babtized-Tatars	Russia	NorthAsia	1	not merged	1	55.9	51.2
Balkars	Russia	NorthAsia	1	not merged	1	43.7	44.2
Chane	Argentina	America	1	not merged	1	-22.53	-63.82
Chechen	Russia	NorthAsia	1	not merged	1	43.333	45.65
Chuvashes	Russia	NorthAsia	1	not merged	1	53.7	54.7
Crete	Greece	Europe	1	not merged	1	35.163	25.445
Czech	Czechoslovia(pre1989)	Europe	1	not merged	1	50.1	14.4
Estonian	Estonia	Europe	1	not merged	1	58.386	24.502
Estonian	Estonia	Europe	1	not merged	1	58.985	26.864
Forest-Nenets	Russia	NorthAsia	1	not merged	1	64.9	77.8
Georgians	Georgia	Cent/WestAsia	1	not merged	1	43	41.4
Georgians-Imeretins	Georgia	Cent/WestAsia	1	not merged	1	41.8	44.7
Germans	Germany	Europe	1	not merged	1	52.5	10.1
Hawaiian	USA	Oceania	1	not merged	1	21.3	-157.8
Hungarian	Hungary	Europe	1	not merged	1	47.5	19.1
Iraqi_Jew	Iraq	Cent/WestAsia	1	not merged	1	33.3	44.4
Japanese	Japan	EastAsia	1	not merged	1	37.85	139
Kumyks	Russia	NorthAsia	1	not merged	1	43	47.5
Lebanese	Lebanon	Cent/WestAsia	1	not merged	1	33.8	35.6
Lithuanians	Lithuania	Europe	1	not merged	1	55.3	24
Luhya	Kenya	Africa	1	not merged	1	1.3	36.8
Luo	Kenya	Africa	1	not merged	1	-0.1	34.3
Mansi	Russia	NorthAsia	1	not merged	1	63.8	61.45
Maori	New Zealand	Oceania	1	not merged	1	-41.3	174.5
Mende	Sierra Leone	Africa	1	not merged	1	8.5	-13.2
Mishar-Tatars	Russia	NorthAsia	1	not merged	1	54.8	51.4
Mixtec	Mexico	America	1	not merged	1	17	-97
Moldavians	Moldova	Europe	1	not merged	1	47.1	28.7
Polish	Poland	Europe	1	not merged	1	52.2	21
Quechua	Peru	America	1	not merged	1	-13.5	-72
Saami	Finland	Europe	1	not merged	1	69.9	27
Samaritan	Israel	Cent/WestAsia	1	not merged	1	32.203	35.27
Selkups	Russia	NorthAsia	1	not merged	1	65.7	87
Spanish	Spain	Europe	1	not merged	1	39.9	-4
Turkish	Turkey	Cent/WestAsia	1	not merged	1	38.7	35.5
Yemenite_Jew	Yemen	Cent/WestAsia	1	not merged	1	15.4	44.2
Abkhasian	Abkhazia	Cent/WestAsia	2	not merged	2	43.003	41.015
Abkhazians	Georgia	Cent/WestAsia	2	not merged	2	43.1	40.6
Aboriginal Australian	Australia	Oceania	2	not merged	2	-20.3107	118.588
Aboriginal Australian	Australia	Oceania	2	not merged	2	-16.9281	145.872
Aboriginal Australian	Australia	Oceania	2	not merged	2	-9.91676	144.051
Arab-Muslim	Israel	Cent/WestAsia	2	not merged	2	32.8	35.2
Arabs	Saudi Arabia	Cent/WestAsia	2	not merged	2	33.8	35.6
Avars	Russia	NorthAsia	2	not merged	2	42.2	47
Azerbaijanis	Azerbaijan	Cent/WestAsia	2	not merged	2	40.1	47.5
Bashkirs	Russia	NorthAsia	2	not merged	2	51.9	58.2
Bulgarian	Bulgaria	Europe	2	not merged	2	42.163	24.741
Circassians	Russia	NorthAsia	2	not merged	2	44.7	40
Colombian	Colombia	America	2	not merged	2	3	-68
Congo-pygmies	Congo	Africa	2	not merged	2	0.9	15.9
Cossacks	Ukraine	Europe	2	not merged	2	47.8	35.2
Druze	Israel	Cent/WestAsia	2	not merged	2	32.8	35.2
Georgian	Georgia	Cent/WestAsia	2	not merged	2	42.5	41.85
Greek	Greece	Europe	2	not merged	2	38	23.7
Hungarians	Ukraine	Europe	2	not merged	2	48	24.3
Iranian	Iran	Cent/WestAsia	2	not merged	2	35.586	51.46
Jordanians	Jordan	Cent/WestAsia	2	not merged	2	31.9	35.9
Kabardins	Russia	NorthAsia	2	not merged	2	43.5	43.6
Kets	Russia	NorthAsia	2	not merged	2	62.5	86.3
Komis	Russia	NorthAsia	2	not merged	2	62.6	58
Kuban-Cossacks	Russia	NorthAsia	2	not merged	2	45	38.7
Latvians	Latvia	Europe	2	not merged	2	56.9	24.5
Lezgin	Russia	NorthAsia	2	not merged	2	42.117	48.183
Lezgins	Russia	NorthAsia	2	not merged	2	41.6	48.3
Masai	Kenya	Africa	2	not merged	2	-1.5	35.2
Maya	Mexico	America	2	not merged	2	19	-91
North_Ossetian	Russia	NorthAsia	2	not merged	2	43.017	44.65
North-Ossetians	Russia	NorthAsia	2	not merged	2	43.2	43.9
North-Russians	Russia	NorthAsia	2	not merged	2	64.7	43.4
Saharawi	Western Sahara (Morocco)	Africa	2	not merged	2	27.3	-8.9
Swedes	Sweden	Europe	2	not merged	2	59.4	18
Tabasarans	Russia	NorthAsia	2	not merged	2	42	47.9
Tatars	Russia	NorthAsia	2	not merged	2	54.6	53.8
Tundra-Nenets	Russia	NorthAsia	2	not merged	2	67	78.2
Wichi, Andean-LA	Argentina	America	2	not merged	2	-23.2	-64.1
Zapotec	Mexico	America	2	not merged	2	16.5	-97.2
Albanians	Albania	Europe	3	not merged	3	41.3	19.8
Andean-Calchaquíes	Argentina	America	3	not merged	3	-25.1	-66.2
Arab-Christian	Israel	Cent/WestAsia	3	not merged	3	32.9	35.3
Assyrians	Armenia	Cent/WestAsia	3	not merged	3	40.1	44
Belarusians	Belarus	Europe	3	not merged	3	52.2	24.4
Central-Russians	Russia	NorthAsia	3	not merged	3	57.8	28.3
Croats	Bosnia-Herzegovina	Europe	3	not merged	3	43.3	17.8
Dinka	Sudan	Africa	3	not merged	3	8.78333	27.4
Jordanian	Jordan	Cent/WestAsia	3	not merged	3	32.055	35.914
Karelians	Russia	NorthAsia	3	not merged	3	61.2	32.4
Koinanbe	Papua New Guinea	Oceania	3	not merged	3	-5.5	144.6
Kosipe	Papua New Guinea	Oceania	3	not merged	3	-8.5	147.2
Maris	Russia	NorthAsia	3	not merged	3	55.4	56
Mordvins	Russia	NorthAsia	3	not merged	3	54.1	43.3
Nigerian	Nigeria	Africa	3	not merged	3	9.082	8.67528
Saami	Norway	Europe	3	not merged	3	69.9	25.2
Udmurds	Russia	NorthAsia	3	not merged	3	57.3	54.1
Vepsas	Russia	NorthAsia	3	not merged	3	61.4	34.8
Iranians	Iran	Cent/WestAsia	4	not merged	4	35.1	51.2
Melanesian	Bougainville	Oceania	4	not merged	4	-6	155
Surui	Brazil	America	4	not merged	4	-11	-62
Papuan	New Guinea	Oceania	5	not merged	5	-6.1	145.4
Armenians	Armenia	Cent/WestAsia	6	not merged	6	40.2	44.5
Karitiana	Brazil	America	6	not merged	6	-10	-63
San	Namibia	Africa	6	not merged	6	-21	20
Tuscan	Italy	Europe	6	not merged	6	43	11
Adygei	Russia-Caucasus	NorthAsia	7	not merged	7	44	39
Italian	Italy-Bergamo	Europe	7	not merged	7	46	10
Orcadian	Orkney Islands	Europe	7	not merged	7	59	-3
Ukrainians	Ukraine	Europe	7	not merged	7	51.5	31.4
Bantu	South Africa	Africa	8	not merged	8	-25.6	24.25
Colla, Andean-HA	Argentina	America	8	not merged	8	-24.2	-66.3
Papuan	New Guinea	Oceania	8	not merged	8	-4	143
Pima	Mexico	America	8	not merged	8	29	-108
Bantu	Kenya	Africa	10	not merged	10	-3	37
Mbuti Pygmy	Congo	Africa	11	not merged	11	1	29
Druze	Israel-Carmel	Cent/WestAsia	12	not merged	12	32	35
French	France	Europe	12	not merged	12	46	2
Yoruba	Nigeria	Africa	12	not merged	12	8	5
Estonians	Estonia	Europe	13	not merged	13	59	22.8
Basque	France	Europe	15	not merged	15	43	0
FIN	Finland	Europe	15	not merged	15	60.2	24.9
Mandenka	Senegal	Africa	15	not merged	15	12	-12
Palestinian	Israel-Central	Cent/WestAsia	15	not merged	15	32	35
Russian	Russia	NorthAsia	16	not merged	16	61	40
Sardinian	Italy	Europe	16	not merged	16	40	9
Aeta	Philippines	SouthEastAsia	3	2	18	17.6	121
Agta	Philippines	SouthEastAsia	3	2	18	17.8	121.2
Ami	Taiwan	EastAsia	2	2	18	22.8431	121.185
Atayal	Taiwan	EastAsia	1	2	18	24.6117	121.296
Igorot	Philippines	Oceania	2	2	18	17.1	121
She	China	EastAsia	7	2	18	27	119
Japanese	Japan	EastAsia	19	not merged	19	37.5	139
Mozabite	Algeria-Mzab	Africa	19	not merged	19	32	3
Biaka Pygmy	Central African Republic	Africa	22	not merged	22	4	17
FIN	Finland	Europe	23	not merged	23	61.9241	25.7482
Dai	China	EastAsia	7	5	25	21	100
Kinh	Vietnam	SouthEastAsia	1	5	25	21	105.9
Lahu	China	EastAsia	7	5	25	22	100
Naxi	China	EastAsia	6	5	25	26	100
Vietnamese	Vietnam	SouthEastAsia	4	5	25	21	105.9
ASW	African ancestry in Southwest USA	Africa	26	not merged	26	35.0078	-97.0929
Bedouin	Israel-Negev	Cent/WestAsia	26	not merged	26	31	35
MXL	Mexican ancestry in Los Angeles, California	America	33	not merged	33	23.6345	-102.553
Hazara	Pakistan	SouthAsia	19	1	38	33.5	70
Pathan	Pakistan	SouthAsia	19	1	38	33.5	70.5
PEL	Peruvians from Lima, Peru	America	41	not merged	41	-12.0464	-77.0428
CLM	Colombians from Medellin, Colombia	America	43	not merged	43	6.25184	-75.5636
MSL	Mende in Sierra Leone	Africa	43	not merged	43	8.46056	-11.7799
LWK	Luhya in Webuye, Kenya	Africa	45	not merged	45	0.599206	34.7796
CHB	Han Chinese in Beijing, China	EastAsia	45	13	46	39.9167	116.383
Korean	Korea	EastAsia	1	13	46	37.6	127
ACB	African Caribbeans in Barbados	Africa	47	not merged	47	13.1939	-59.5432
GBR	British in England and Scotland	Europe	47	not merged	47	51.2	0.7
CDX	Chinese Dai in Xishuangbanna, China	EastAsia	50	not merged	50	22.0074	100.798
Altai-Kizhi	Russia	NorthAsia	3	12	51	51.3	85.4
Altai-Telengit	Russia	NorthAsia	1	12	51	50.8	88.3
Altaian	Russia	NorthAsia	1	12	51	50.84	85.654
Buryats	Russia	NorthAsia	12	12	51	53.8	102.8
Daur	China	EastAsia	7	12	51	48.5	124
Hezhen	China	EastAsia	6	12	51	47.5	133.5
Mongol-Khalkh	Mongolia	EastAsia	4	12	51	43.5	104.3
Mongol-Khalkh	Mongolia	EastAsia	1	12	51	45.7	106.3
Mongol-Zakhchin	Mongolia	EastAsia	1	12	51	48	91.6
Mongola	China	EastAsia	6	12	51	48.5	119
Oroqen	China	EastAsia	6	12	51	50.4	126.5
Shor	Russia	NorthAsia	1	12	51	52.8	87.9
Tuvinians	Russia	NorthAsia	2	12	51	51.5	92.8
CEU	Utah Residents with Northern and Western European Ancestry	Europe	52	not merged	52	46.2276	2.21375
ESN	Esan in Nigeria	Africa	53	not merged	53	6.5	6
IBS	Iberian Population in Spain	Europe	53	not merged	53	40.4637	-3.74922
TSI	Toscani in Italia	Europe	53	not merged	53	43.7696	11.2558
CHS	Southern Han Chinese, China	EastAsia	54	not merged	54	22.5429	114.063
PUR	Puerto Ricans from Puerto Rico	America	54	not merged	54	18.2208	-66.5901
JPT	Japan	EastAsia	55	not merged	55	35.6528	139.839
Han	China	EastAsia	16	10	55	32.3	114
Han-NChina	China	EastAsia	8	10	55	34.7	107.8
Miao	China	EastAsia	7	10	55	28	109
Tu	China	EastAsia	7	10	55	36	101
Tujia	China	EastAsia	8	10	55	29	109
Yi	China	EastAsia	9	10	55	28	103
Aleut	Russia	NorthAsia	1	14	55	55.18	166
Chukchi	Russia	NorthAsia	1	14	55	69	169
Chukchis	Russia	NorthAsia	2	14	55	64.7	177.5
Eskimo	Russia	NorthAsia	2	14	55	64.5	-172.9
Eskimo_Chaplin	Russia	NorthAsia	1	14	55	64.48	172.86
Eskimo_Sireniki	Russia	NorthAsia	1	14	55	64.4	173.9
Even	Russia	NorthAsia	1	14	55	57.53	135.88
Evenks	Russia	NorthAsia	3	14	55	58.9	128.7
Evens	Russia	NorthAsia	8	14	55	65.3	130
Koryaks	Russia	NorthAsia	12	14	55	59.1	159.9
Tlingit	Russia	NorthAsia	1	14	55	53	158.65
Yakut	Siberia	NorthAsia	18	14	55	63	129.5
Yakutian	Russia	NorthAsia	4	14	55	62.3	132
GWD	Gambian in Western Divisions in the Gambia	Africa	55	not merged	55	13.4	-16.7
STU	Sri Lankan Tamil from the UK	SouthAsia	55	not merged	55	6.92708	79.8612
YRI	Yoruba in Ibadan, Nigeria	Africa	55	not merged	55	7.37754	3.94704
GIH	Gujarati Indian from Houston, Texas	SouthAsia	58	not merged	58	23.2376	72.6478
Bajo	Indonesia	SouthEastAsia	4	3	65	-4	122.6
Batak	Philippines	SouthEastAsia	3	3	65	10.5	119.5
Dusun	Brunei	SouthEastAsia	3	3	65	4.5	114.7
Lebbo	Indonesia	SouthEastAsia	4	3	65	1.7	117.2
Malays	Singapore	SouthEastAsia	46	3	65	1.29027	103.852
Murut	Brunei	SouthEastAsia	5	3	65	4.5	114.7
Asur	India	SouthAsia	1	11	66	23.7	85.3
Bangladeshi	Bangladesh	SouthAsia	2	11	66	23.7	90.4
BEB	Bengali from Bangladesh	SouthAsia	42	11	66	23.7288	90.3938
Brahmin	India	SouthAsia	2	11	66	25.3	83.1
Gond	India	SouthAsia	1	11	66	22.2	79.9
Gupta	India	SouthAsia	1	11	66	25.5	82.9
Ho	India	SouthAsia	1	11	66	24.1	84.2
Kol	India	SouthAsia	1	11	66	24.5	83.2
Kshatriya	India	SouthAsia	1	11	66	25.7	82.7
Kurmi	India	SouthAsia	1	11	66	25.2	83
Kusunda	Nepal	SouthAsia	1	11	66	28.0725	82.4878
Kusunda	Nepal	SouthAsia	1	11	66	28.0725	84.2595
Madhya-Pradesh caste	India	SouthAsia	1	11	66	23.3	77.1
Nepali	Nepal	SouthAsia	1	11	66	26.8	87.3
Odisha	India	SouthAsia	1	11	66	20.5	85.9
Santhal	India	SouthAsia	1	11	66	22.8	85.7
Tamang	India	SouthAsia	1	11	66	27.1	88.3
Thakur	India	SouthAsia	1	11	66	27	77.2
Tibetan	China	EastAsia	4	11	66	29.6453	91.2263
West-Bengali	India	SouthAsia	1	11	66	22.9	88.3
Andamanese	Andaman Islands	SouthAsia	5	4	67	11.6	92.6
Burmese	Myanmar	SouthEastAsia	8	4	67	16.4	95.9
Burmese	Myanmar	SouthEastAsia	2	4	67	17	96.7
Cambodian	Cambodia	SouthEastAsia	5	4	67	12	105
KHV	Kinh Vietnamese, Vietnam	SouthEastAsia	46	4	67	10.7626	106.66
Thai	Thailand	SouthEastAsia	1	4	67	13.8	100.5
PJL	Punjabi from Lahore, Pakistan, SAS	SouthAsia	46	7	69	31.582	74.3294
Punjabi	India	SouthAsia	1	7	69	17	75.9
Punjabi	Pakistan	SouthAsia	2	7	69	31.5	74.3
Sindhi	Pakistan	SouthAsia	20	7	69	25.5	69
Balochi	Pakistan	SouthAsia	24	9	69	30.5	66.5
Brahui	Pakistan	SouthAsia	25	9	69	30.5	66.5
Makrani	Pakistan	SouthAsia	20	9	69	26	64
Burusho	Pakistan	SouthAsia	20	8	76	36.5	74
Ishkasim	Tajikistan	Cent/WestAsia	2	8	76	37	71.7
Kalash	Pakistan	SouthAsia	17	8	76	36	71.5
Kazakhs	Kazakhstan	Cent/WestAsia	3	8	76	47.5	61.5
Kyrgyz	Kyrgyzstan	Cent/WestAsia	7	8	76	42.2	77
Kyrgyz	Kyrgyzystan	Cent/WestAsia	1	8	76	42.9	74.6
Rushan-Vanch	Tajikistan	Cent/WestAsia	2	8	76	38.5	71.7
Shugnan	Tajikistan	Cent/WestAsia	1	8	76	37.5	72.4
Tajik	Tajikistan	Cent/WestAsia	2	8	76	37.508	71.568
Tajiks	Tajikistan	Cent/WestAsia	1	8	76	38.4	68.9
Turkmens	Uzbekistan	Cent/WestAsia	3	8	76	42.6	58.9
Uygur	China	EastAsia	8	8	76	44	81
Uzbek	Uzbekistan	Cent/WestAsia	1	8	76	41	70.9
Xibo	China	EastAsia	8	8	76	43.5	81.5
Balija	India	SouthAsia	1	6	78	14.7	77.6
Brahmin	India	SouthAsia	2	6	78	17.7	83.3
Irula	India	SouthAsia	2	6	78	13.5	80
ITU	Indian Telugu from the UK	SouthAsia	60	6	78	17.1232	79.2088
Kapu	India	SouthAsia	1	6	78	17.7	83.2
Kapu	India	SouthAsia	2	6	78	17.7	83.3
Khonda_Dora	India	SouthAsia	1	6	78	18.3	82.9
Madiga	India	SouthAsia	2	6	78	17.7	83.3
Mala	India	SouthAsia	2	6	78	17.7	83.3
Malayan	India	SouthAsia	1	6	78	10.4	76.7
Relli	India	SouthAsia	2	6	78	17.7	83.3
Yadava	India	SouthAsia	2	6	78	17.7	83.3
Ashkenazi-Jews	France	Europe	2	not merged	NA	NA	NA
Cochin-Jews	India	SouthAsia	1	not merged	NA	NA	NA
Georgian-Jews	Georgia	Cent/WestAsia	1	not merged	NA	NA	NA
Iranian-Jews	Iran	Cent/WestAsia	1	not merged	NA	NA	NA
Iraqi-Jews	Iraq	Cent/WestAsia	3	not merged	NA	NA	NA
Kurdistan-Jews	Iraq	Cent/WestAsia	1	not merged	NA	NA	NA
Moroccan-Jews	Morocco	Africa	1	not merged	NA	NA	NA
Mumbai-Jews	India	SouthAsia	2	not merged	NA	NA	NA
Turkey-Jews	Turkey	Cent/WestAsia	1	not merged	NA	NA	NA
Uzbekistan-Jews	Uzbekistan	Cent/WestAsia	2	not merged	NA	NA	NA
Yemen-Jews	Yemen	Cent/WestAsia	1	not merged	NA	NA	NA
Yemenite-Jews	Yemen	Cent/WestAsia	1	not merged	NA	NA	NA
